# Supplementary material
Source: ML conference proceedings conference paper supplement (https://openreview.net/forum?id=WcZLG8XxhD)

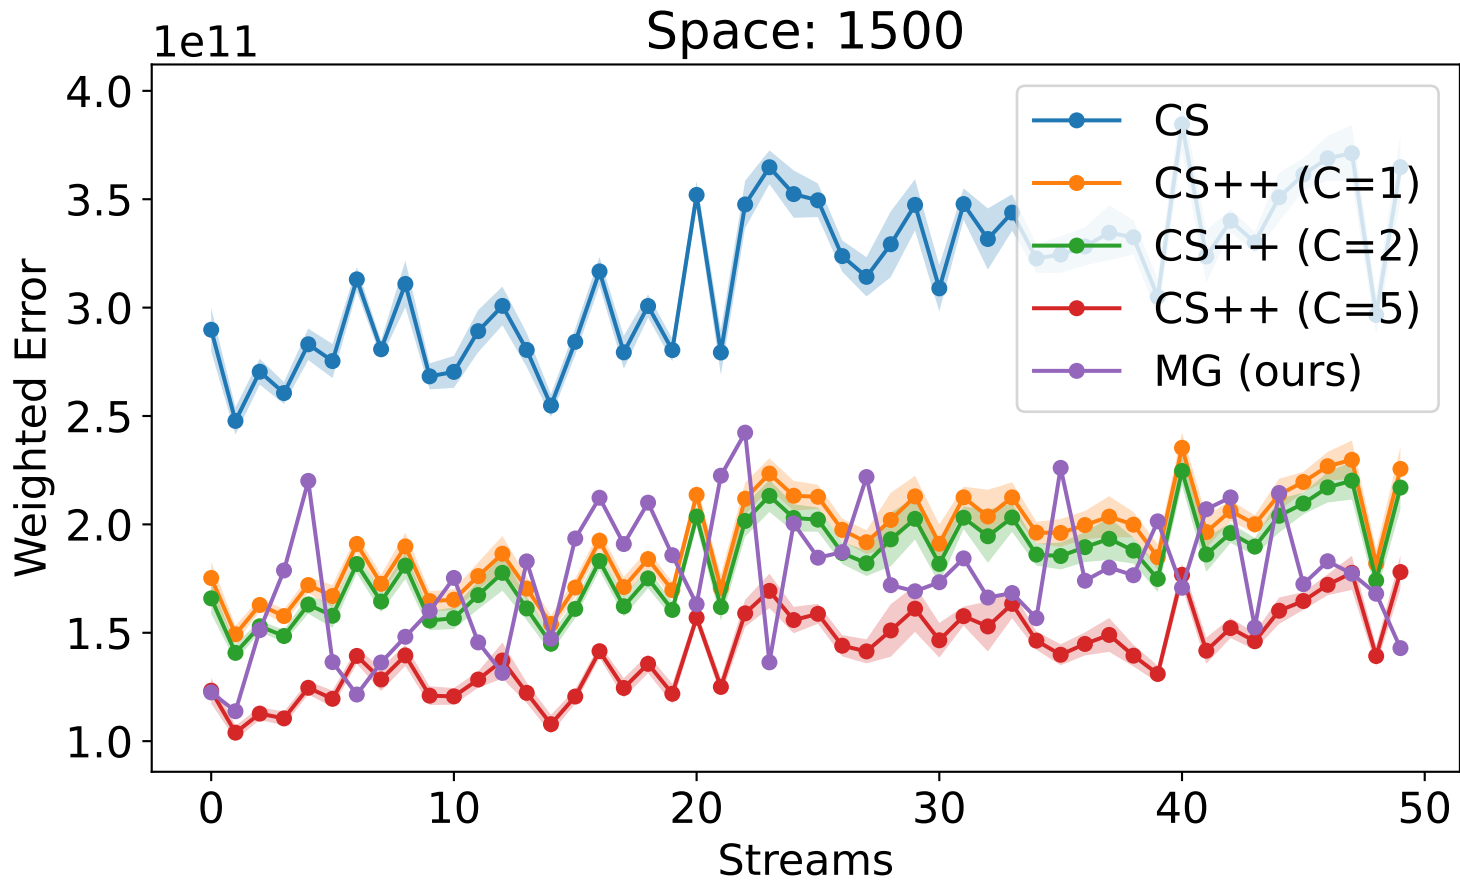

Supplement: supplementary_material [file attachment]

Rank: 140

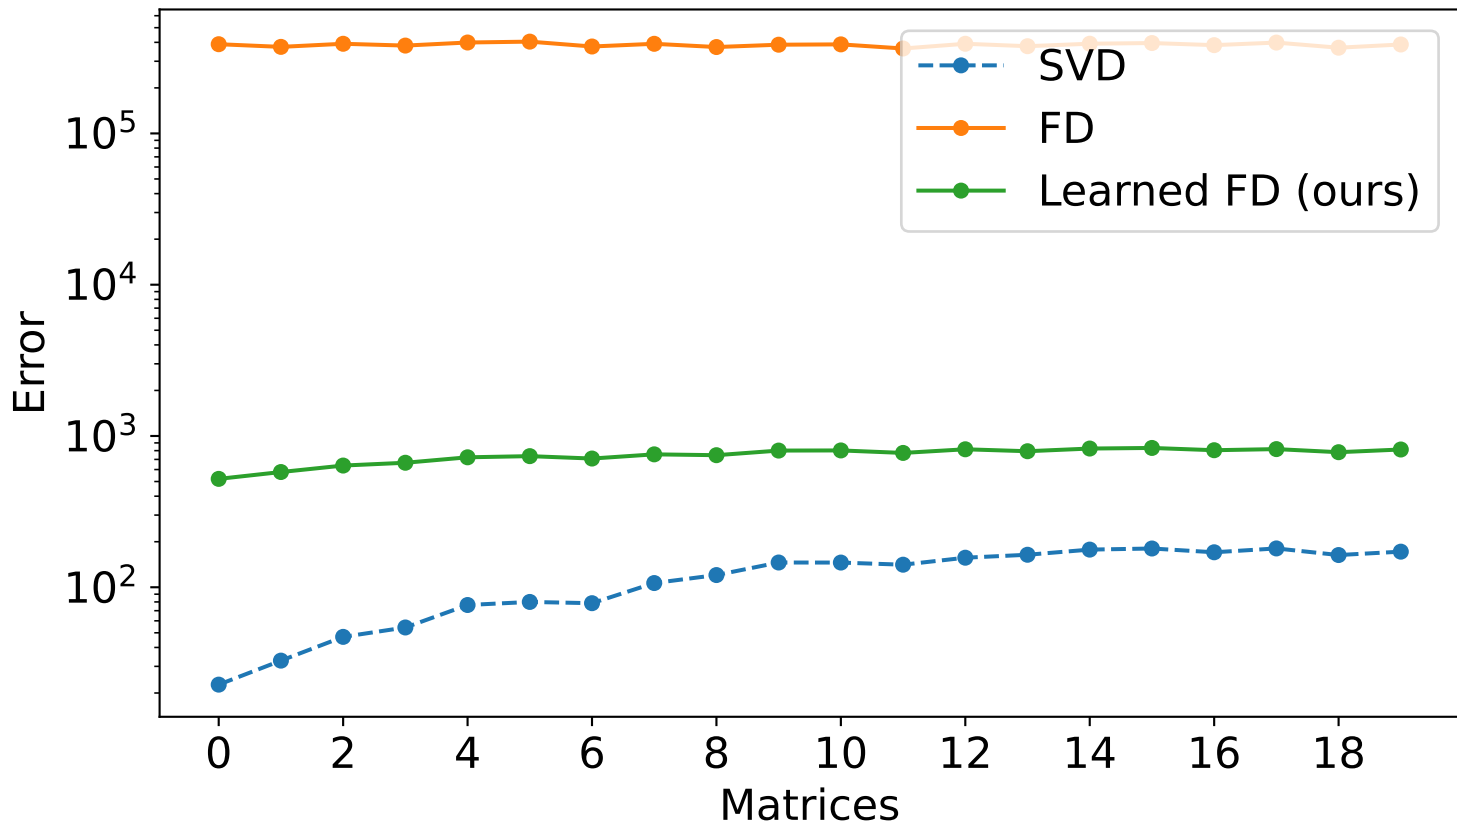

Supplement: supplementary_material [file attachment]

Space: 3000

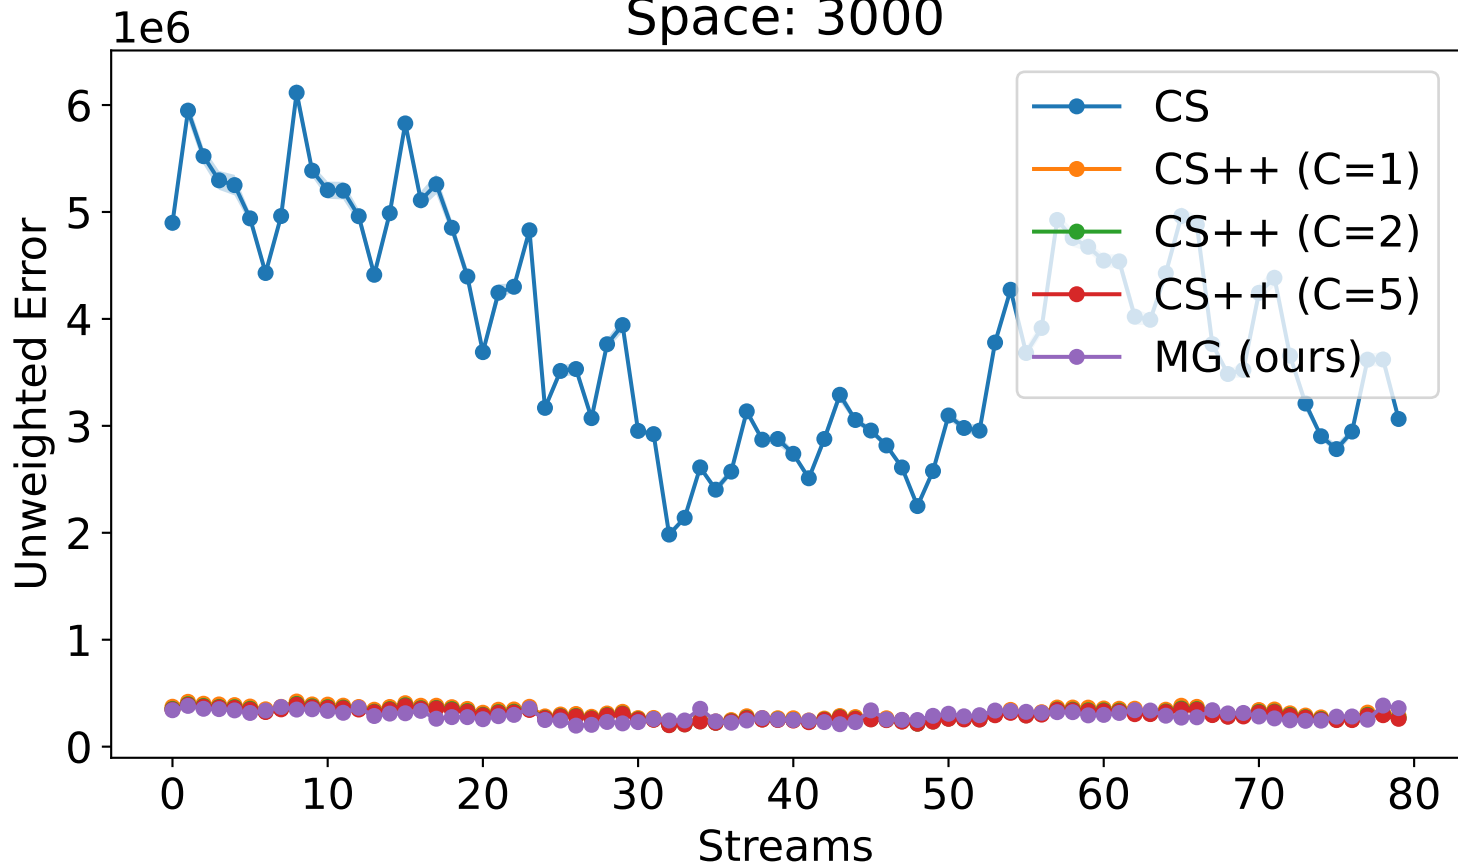

Supplement: supplementary_material [file attachment]

# Error/Rank Tradeoff

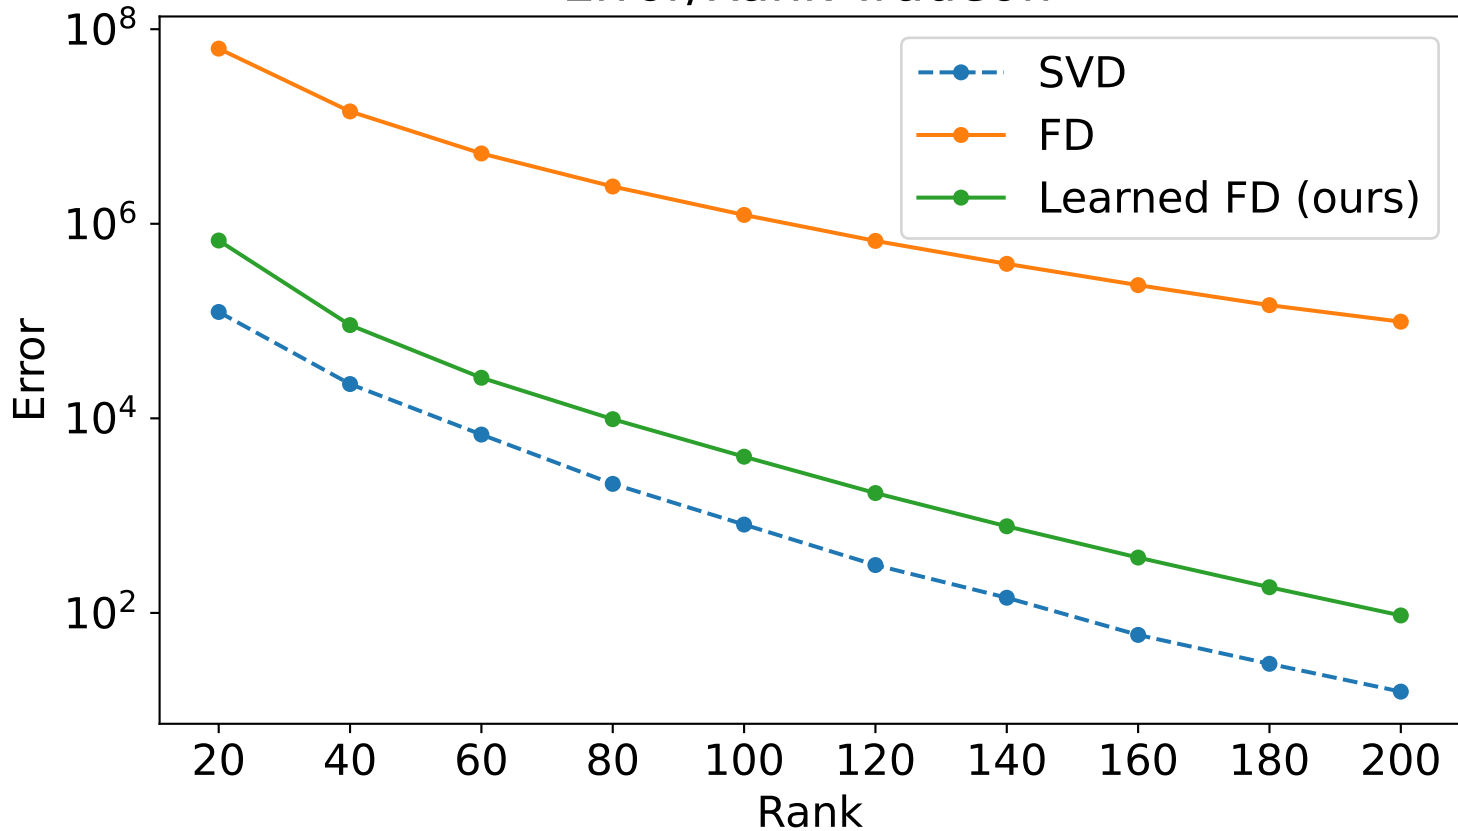

Supplement: supplementary_material [file attachment]

Rank: 60

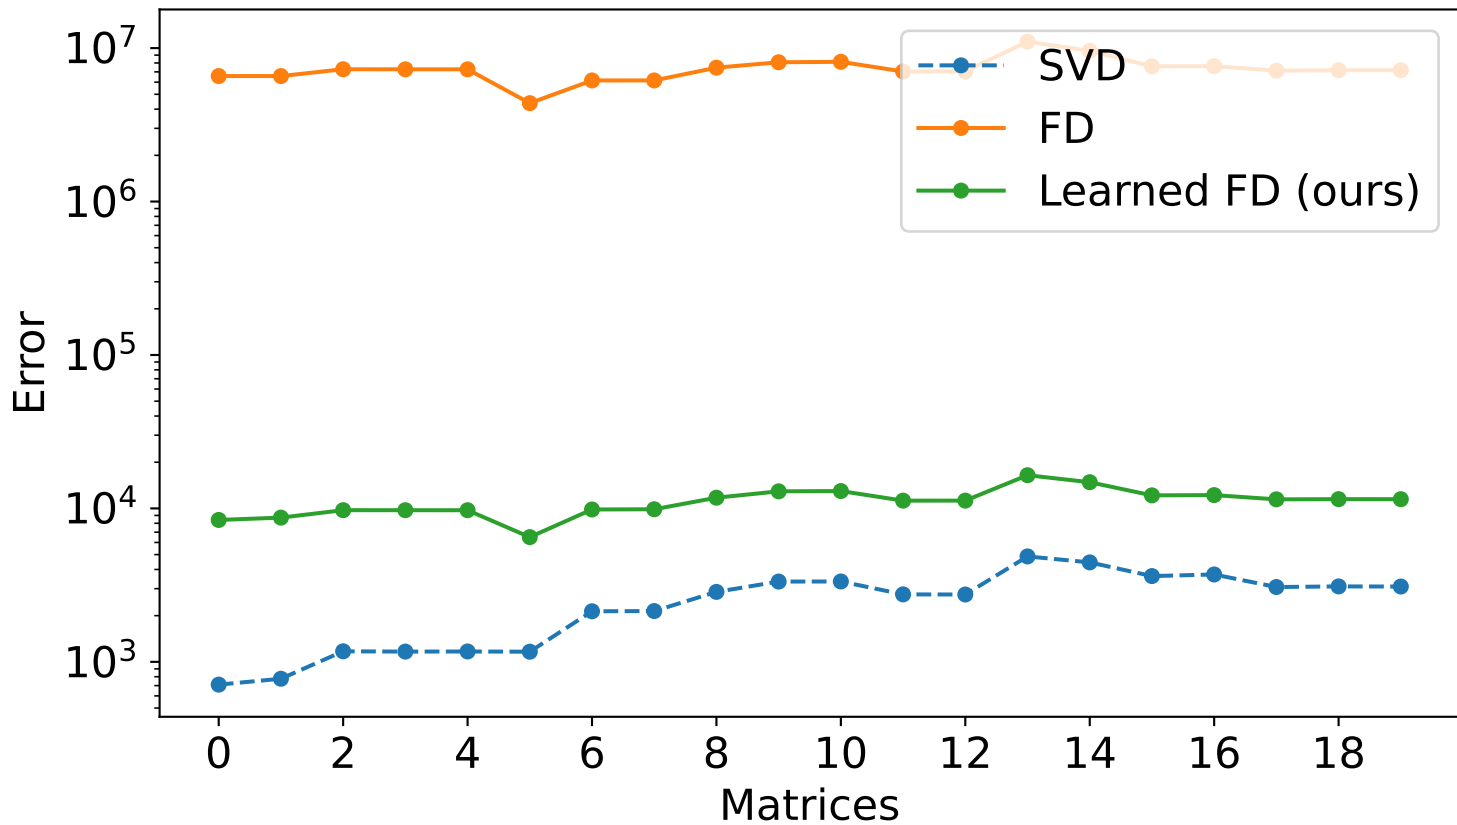

Supplement: supplementary_material [file attachment]

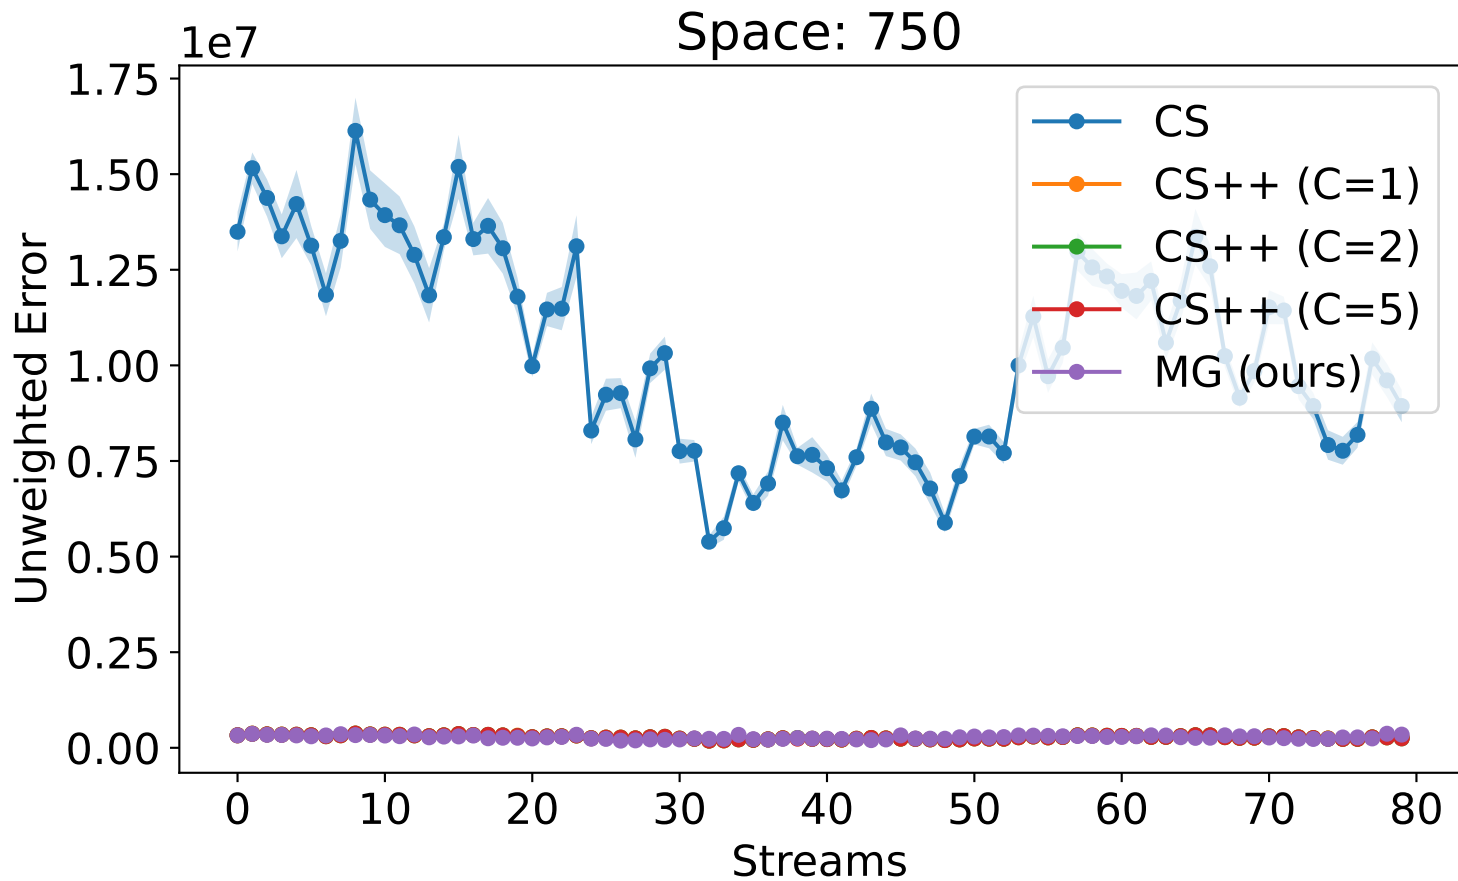

Supplement: supplementary_material [file attachment]

Rank: 20

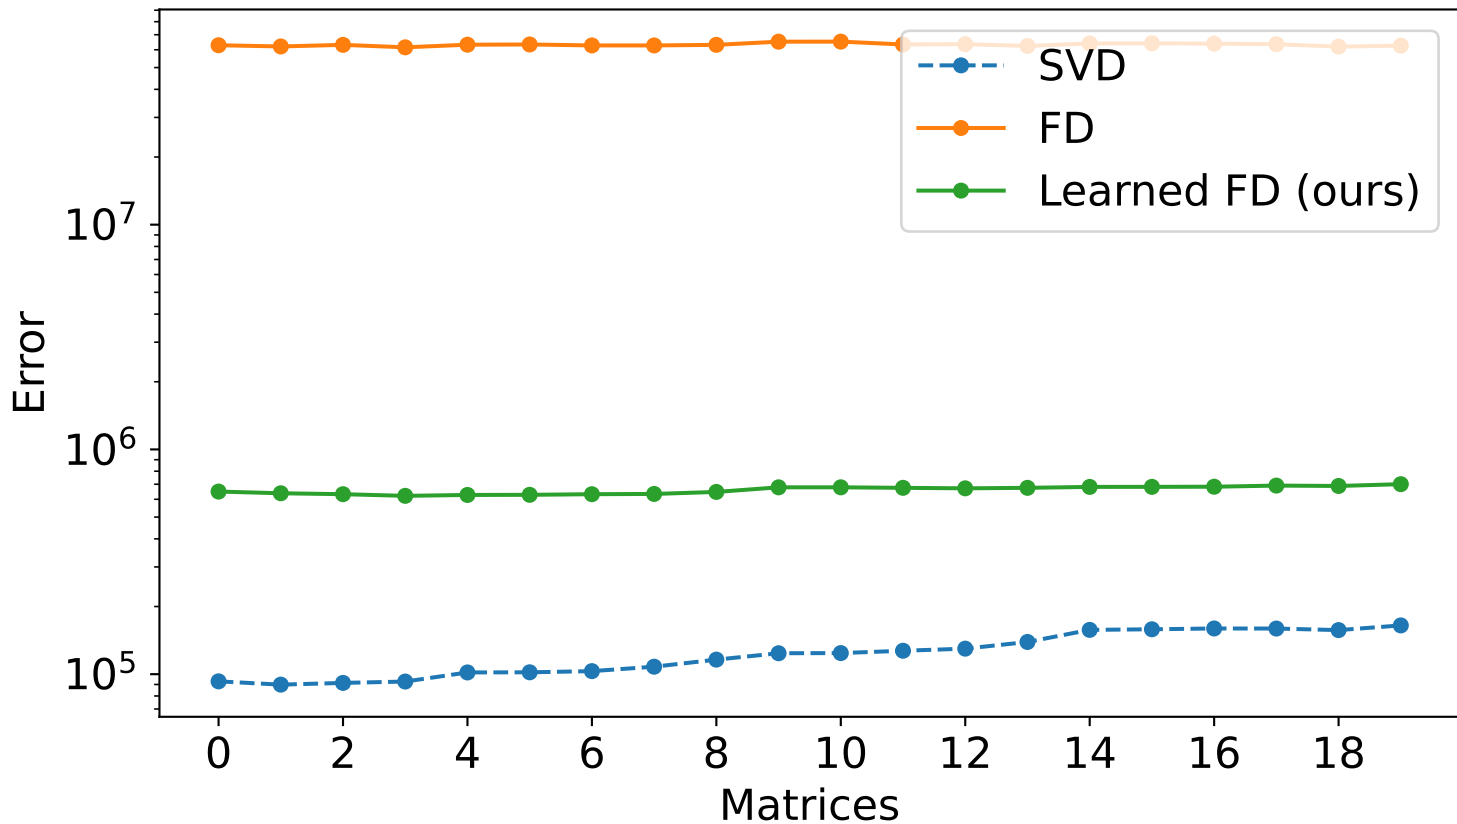

Supplement: supplementary_material [file attachment]

# Error/Space Tradeoff

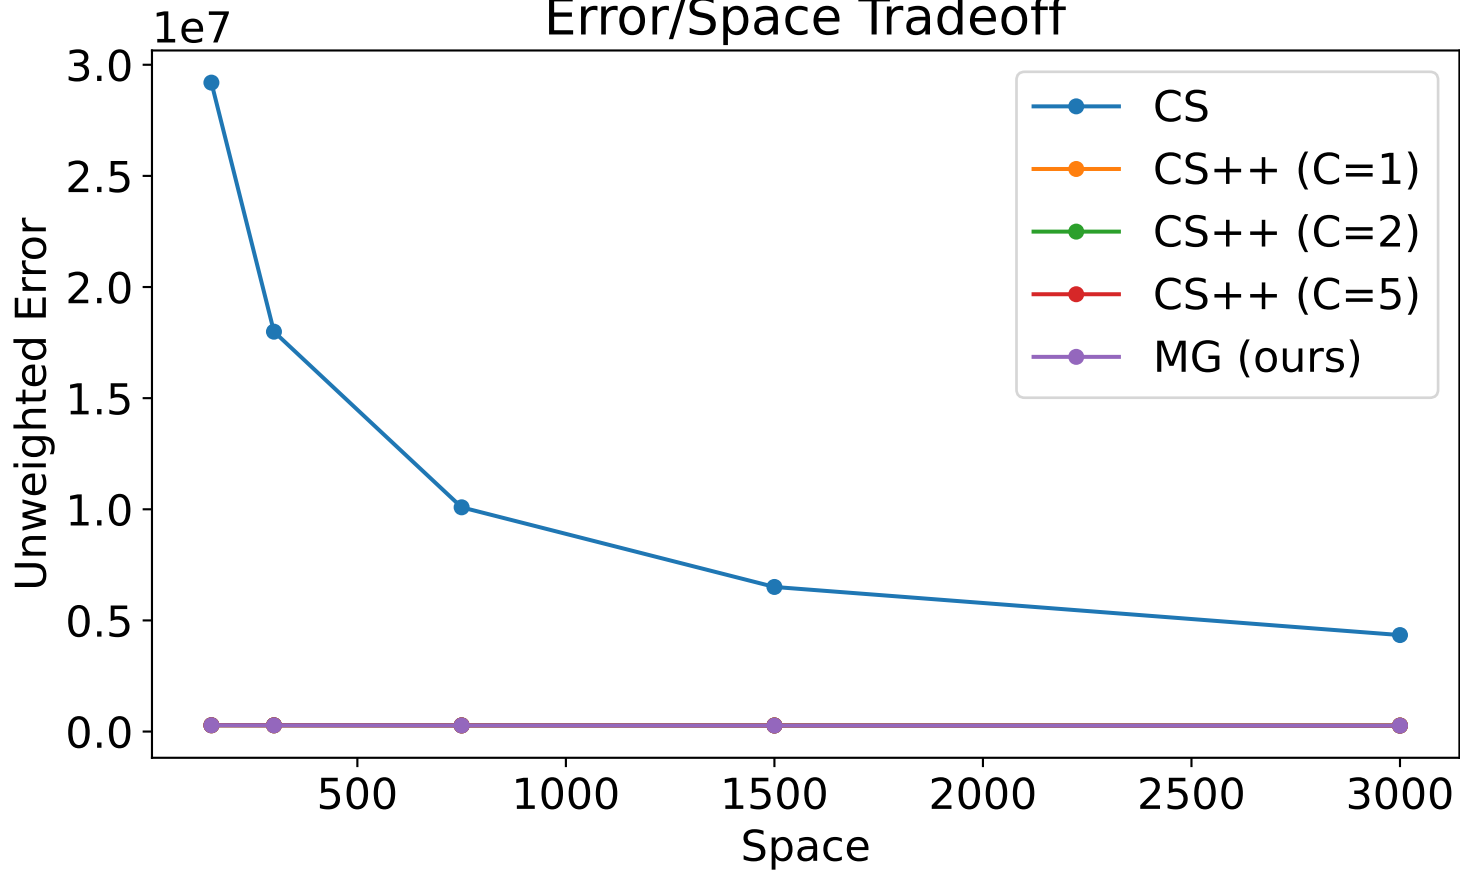

Supplement: supplementary_material [file attachment]

Rank: 140

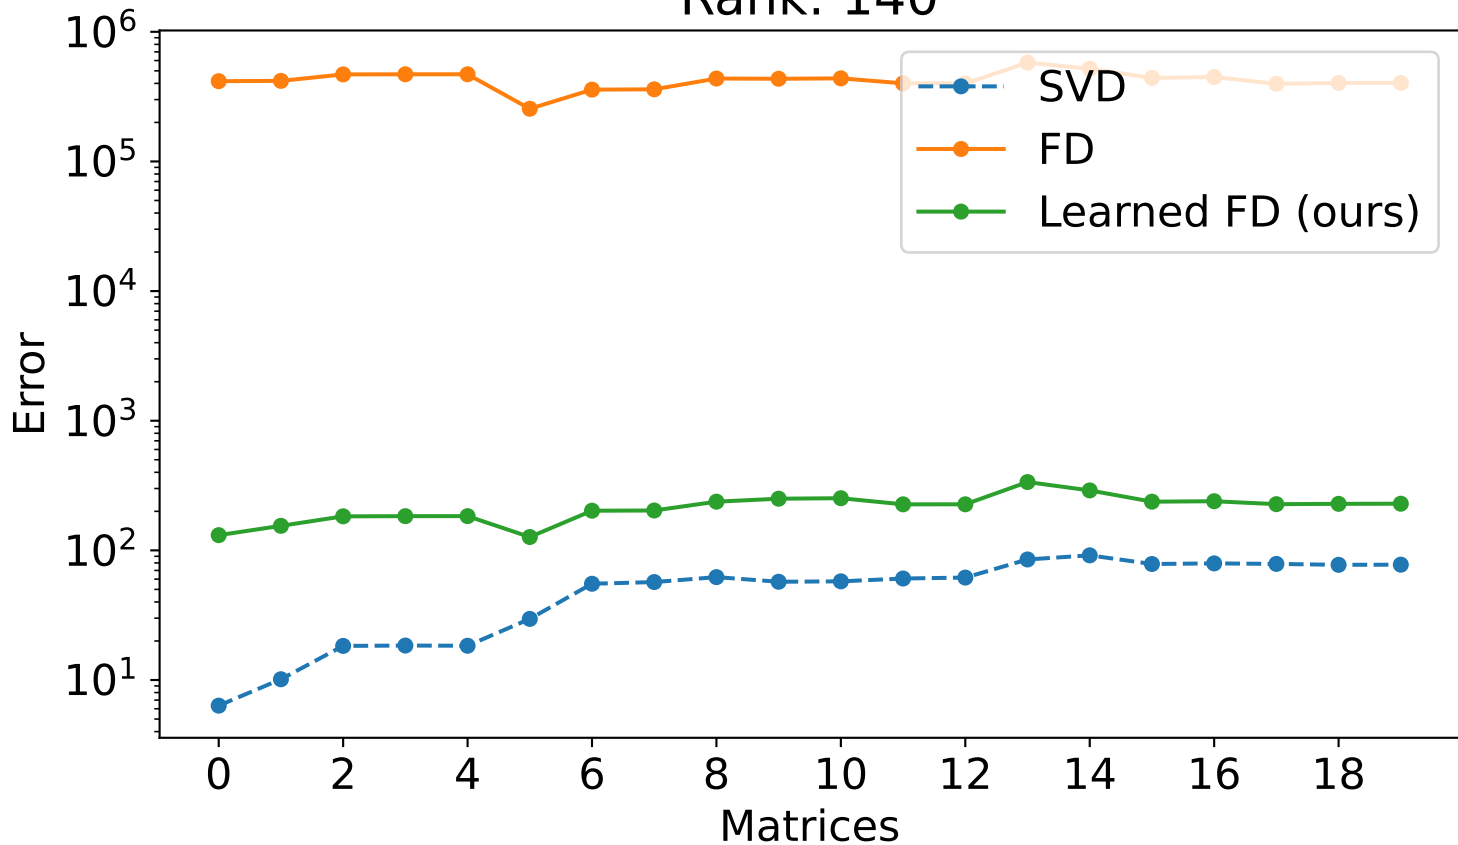

Supplement: supplementary_material [file attachment]

Rank: 100

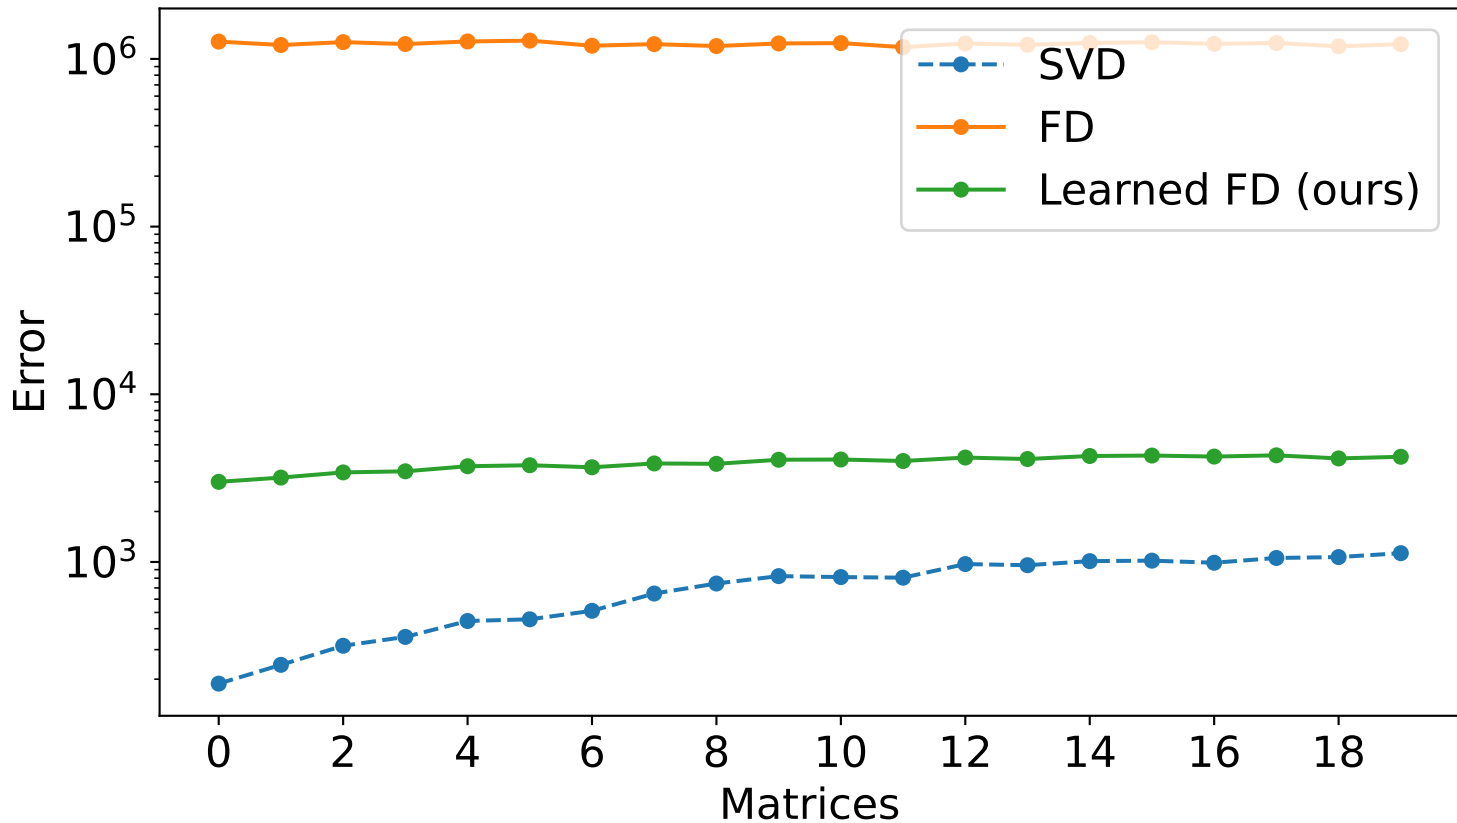

Supplement: supplementary_material [file attachment]

Rank: 200

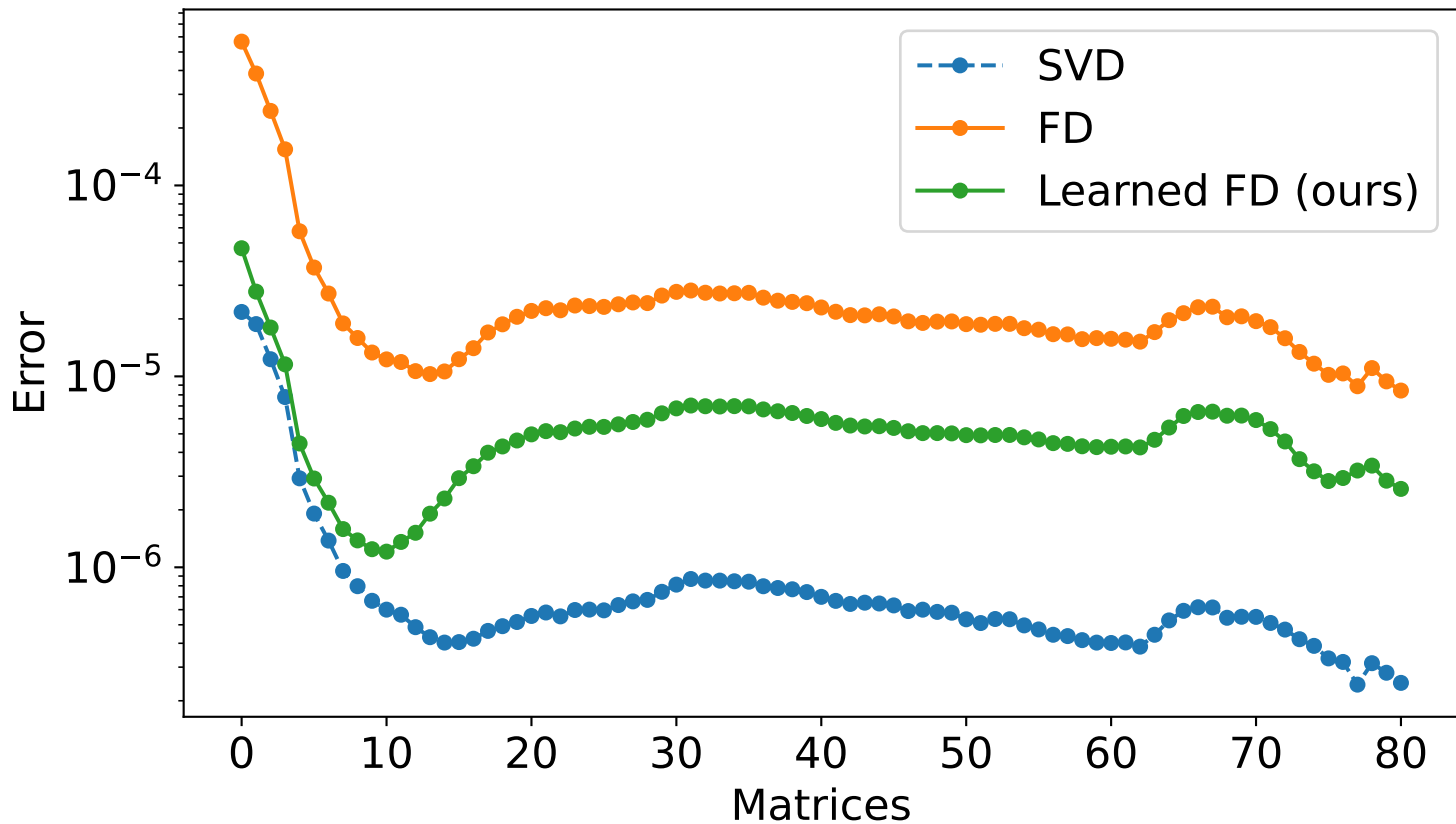

Supplement: supplementary_material [file attachment]

1e11

Space: 3000

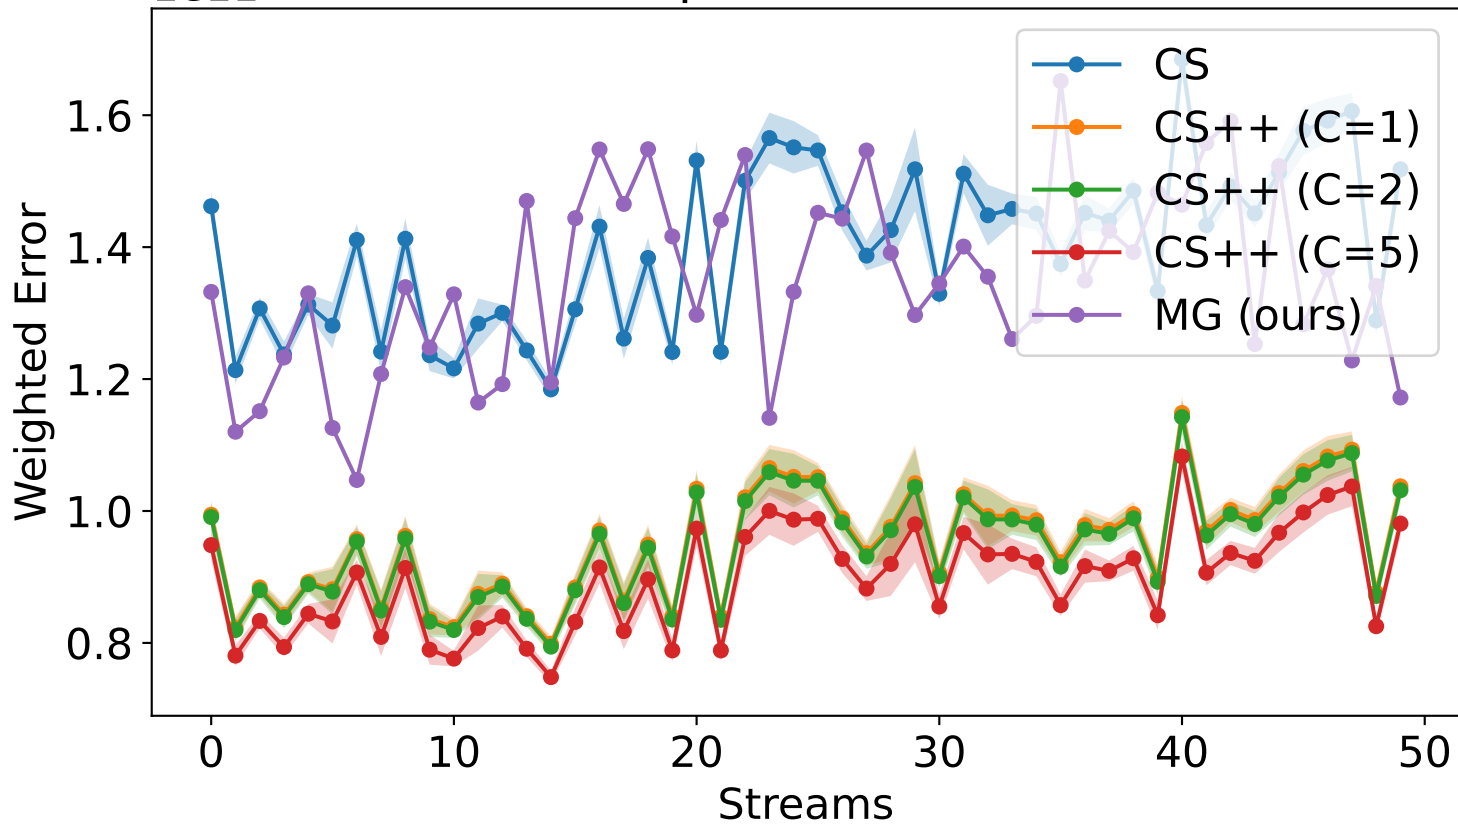

Supplement: supplementary_material [file attachment]

# Logo Log-Log Singular Values

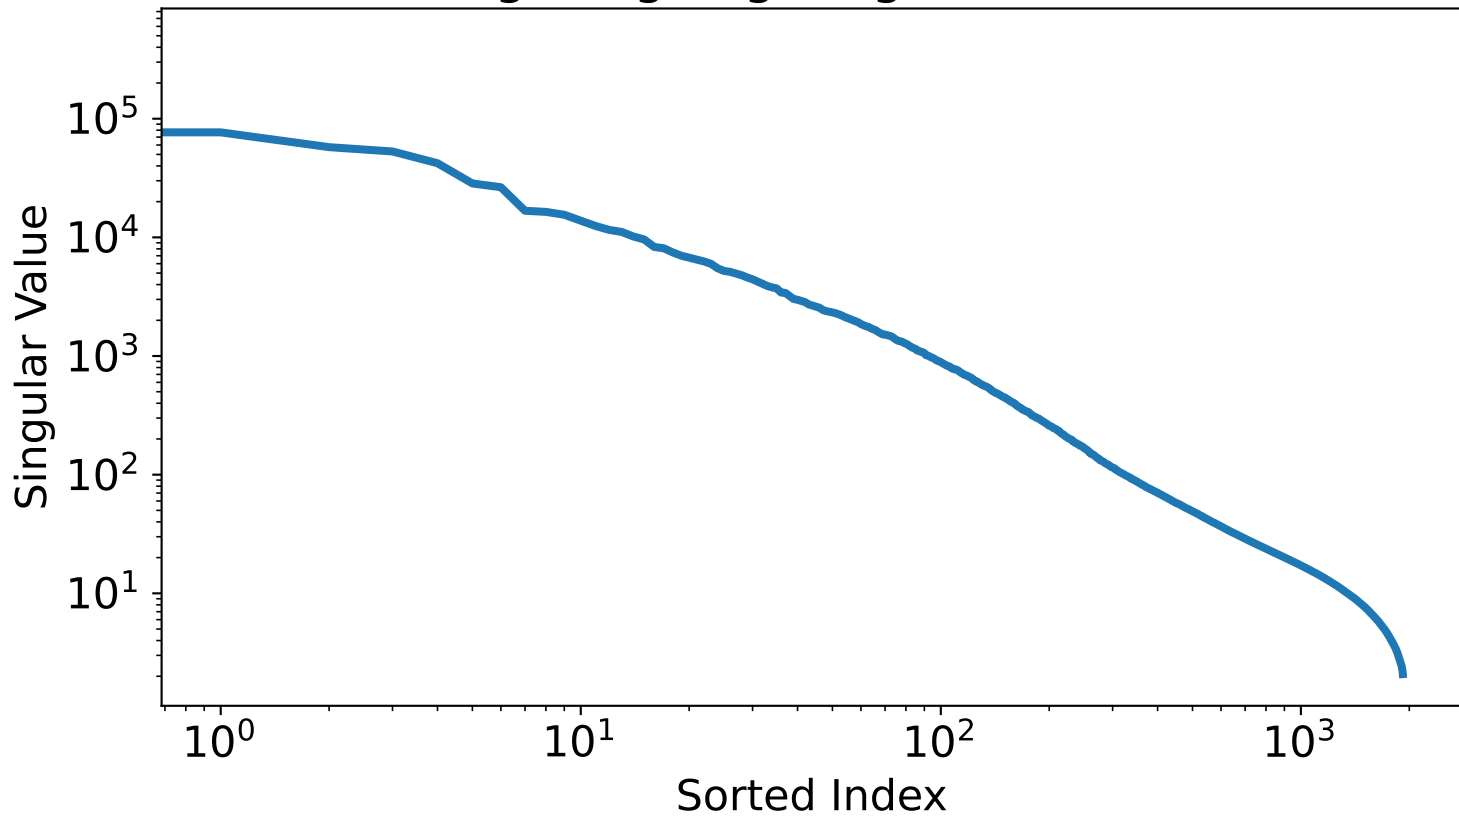

Supplement: supplementary_material [file attachment]

Rank: 40

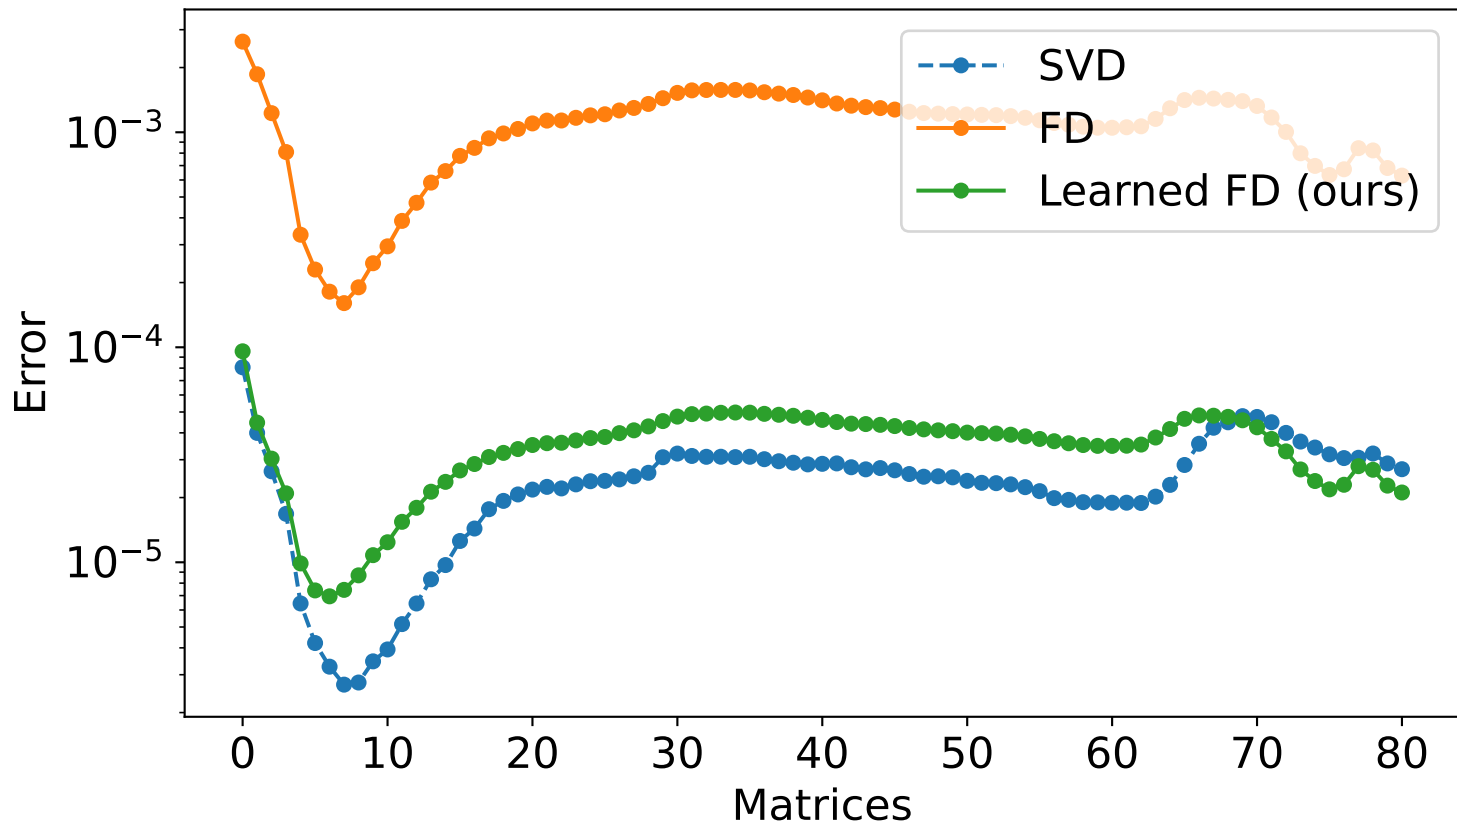

Supplement: supplementary_material [file attachment]

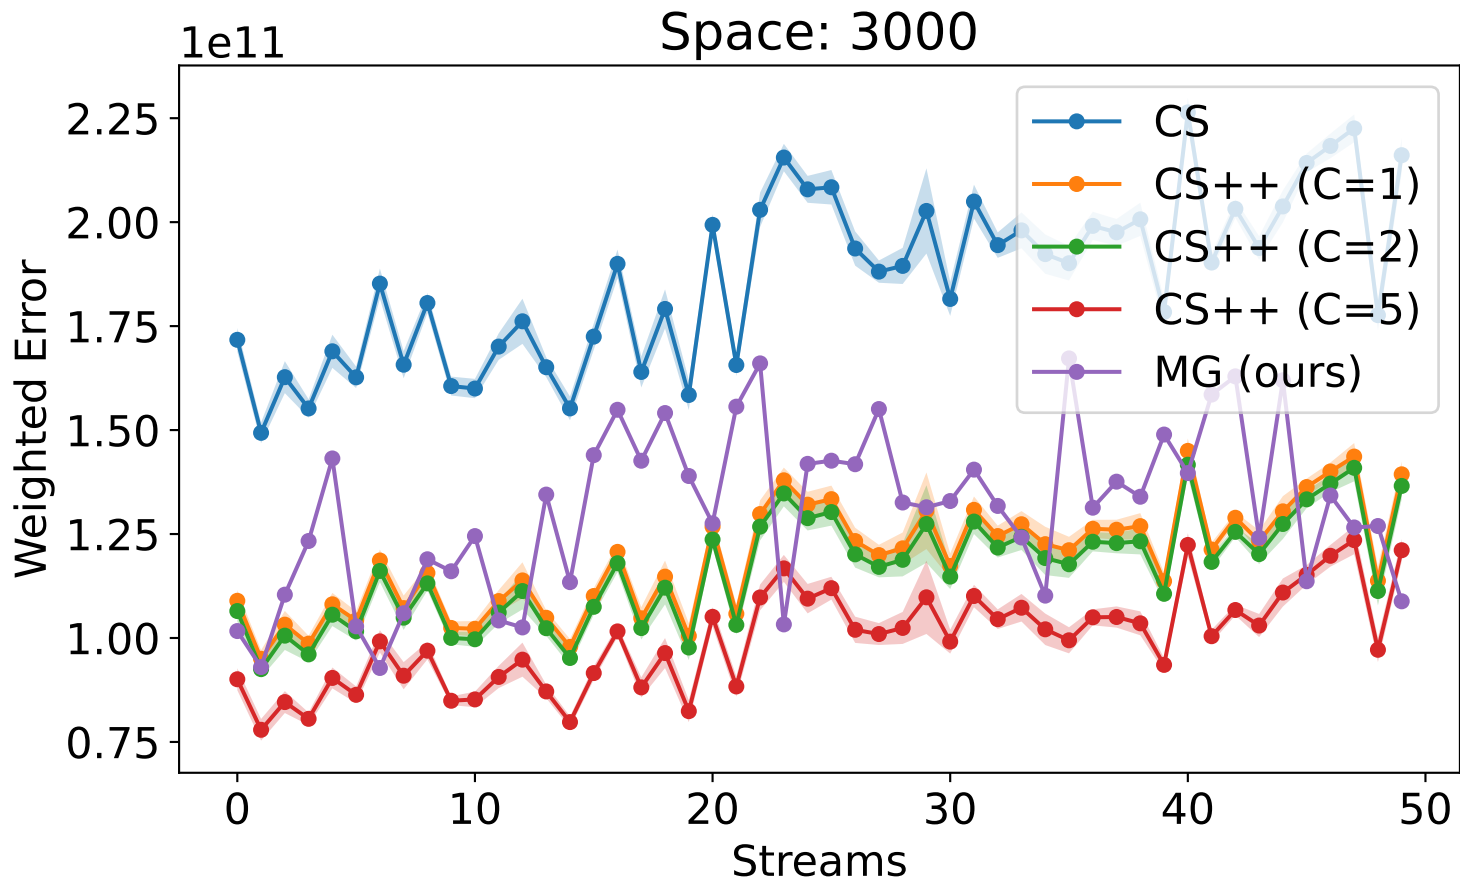

Supplement: supplementary_material [file attachment]

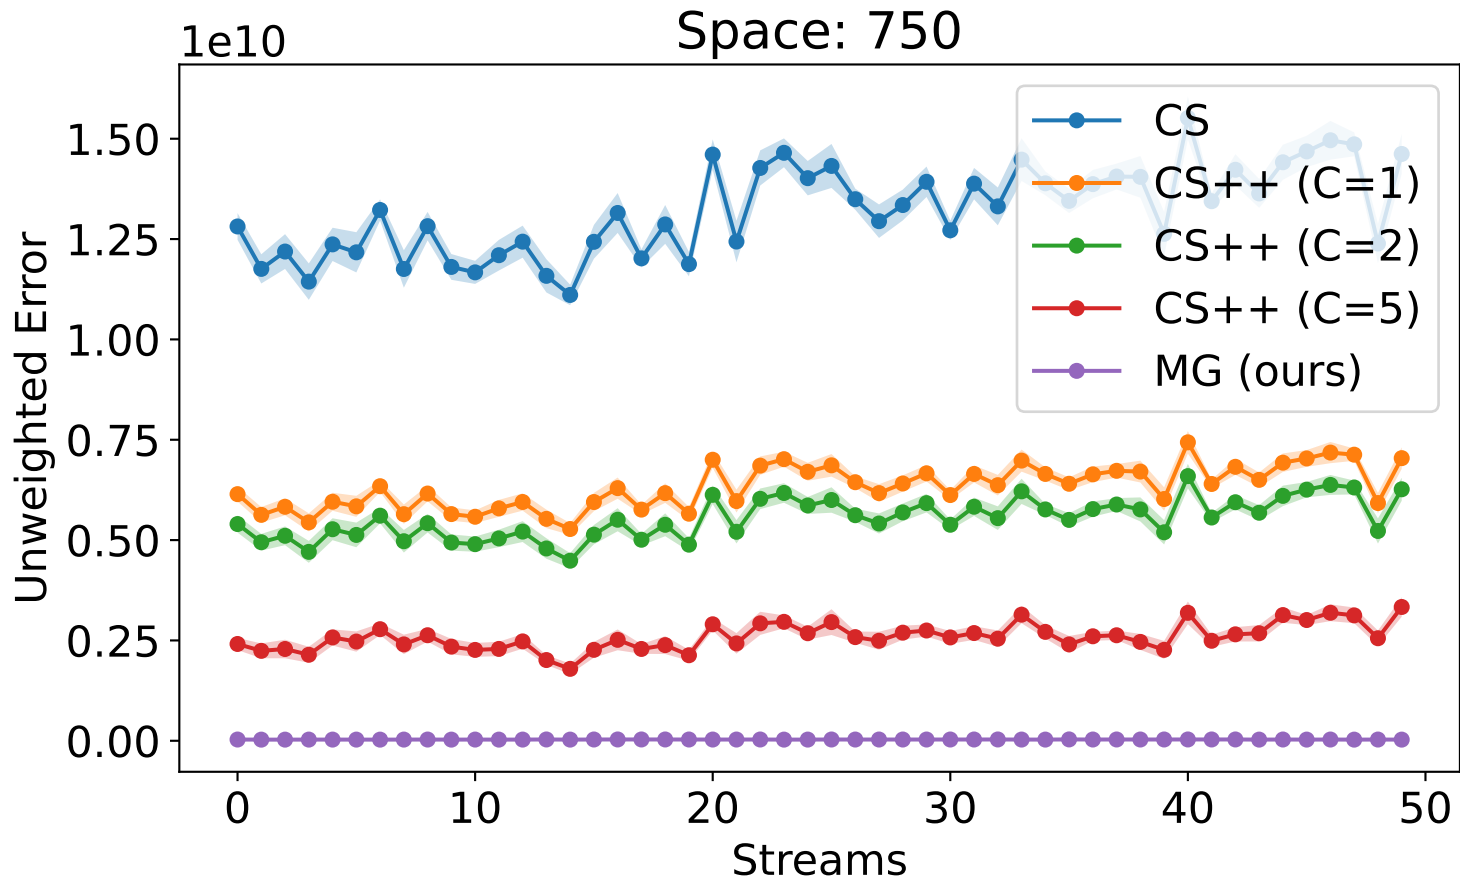

Supplement: supplementary_material [file attachment]

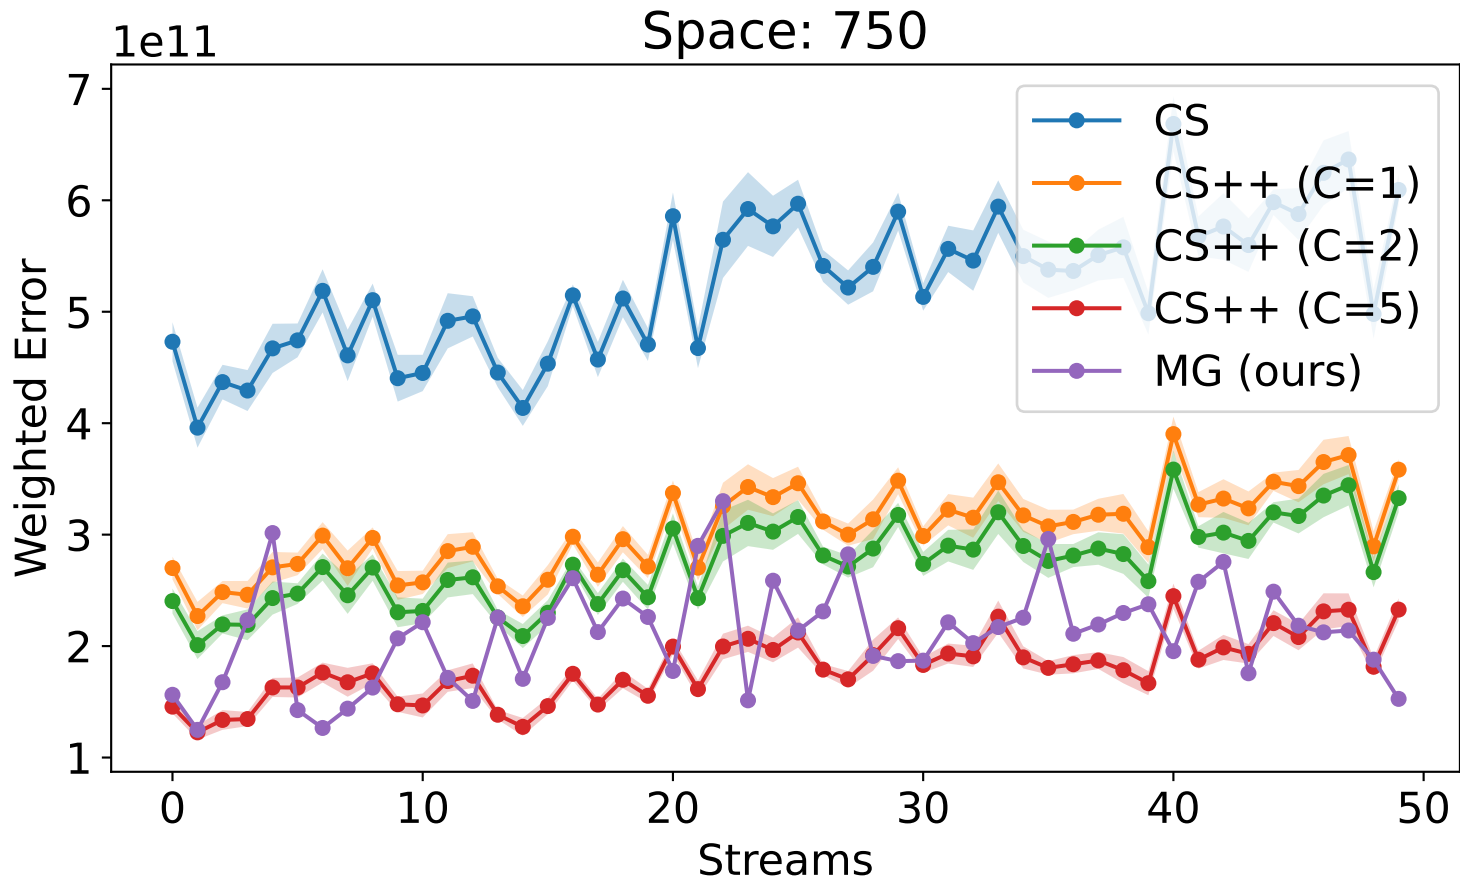

Supplement: supplementary_material [file attachment]

Space: 300

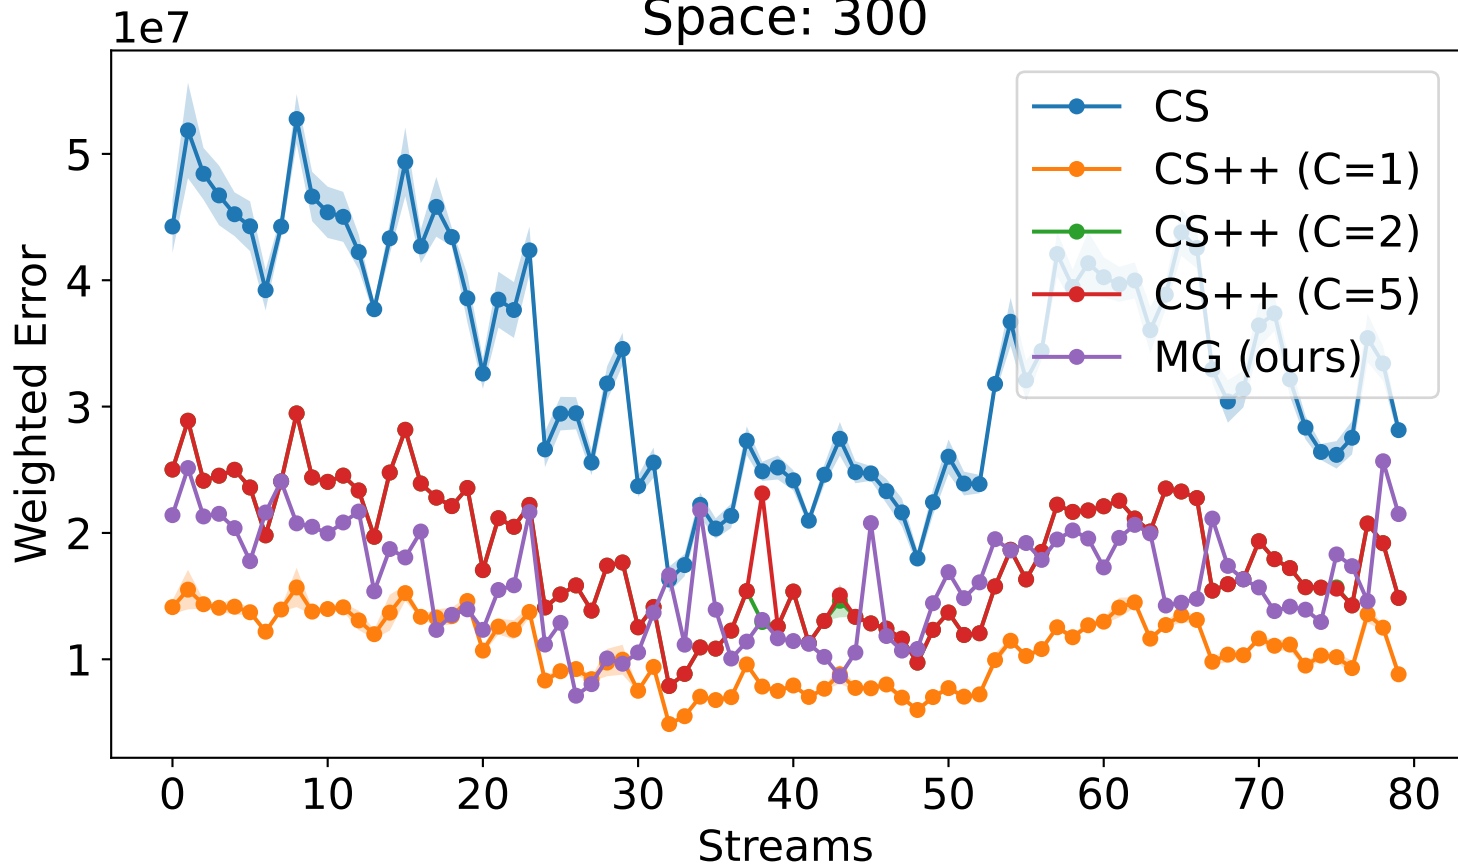

Supplement: supplementary_material [file attachment]

# AOL Log-Log Frequencies

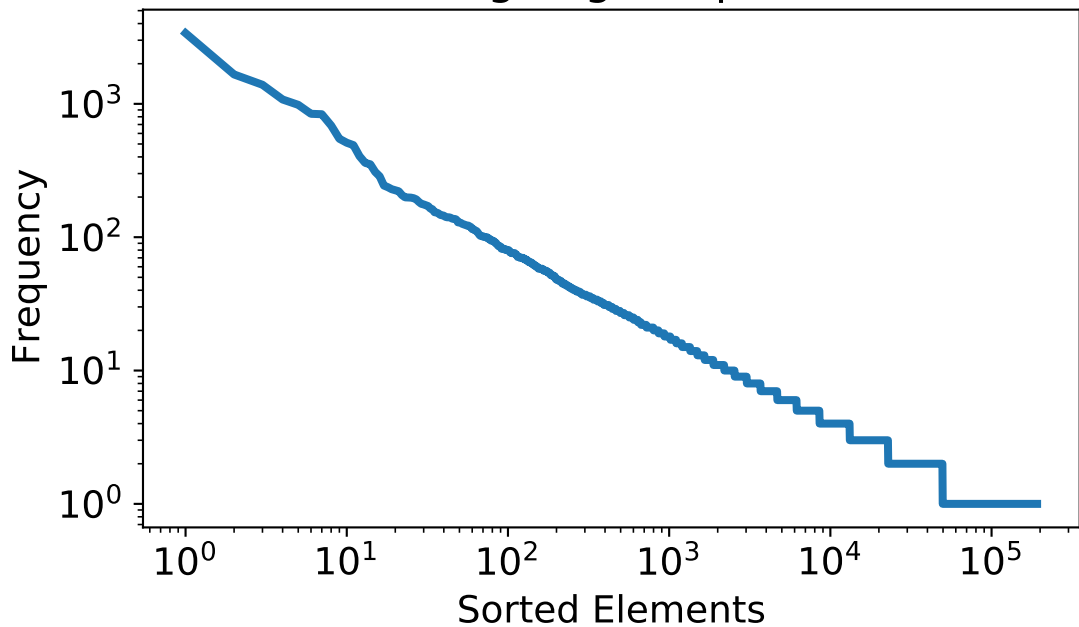

Supplement: supplementary_material [file attachment]

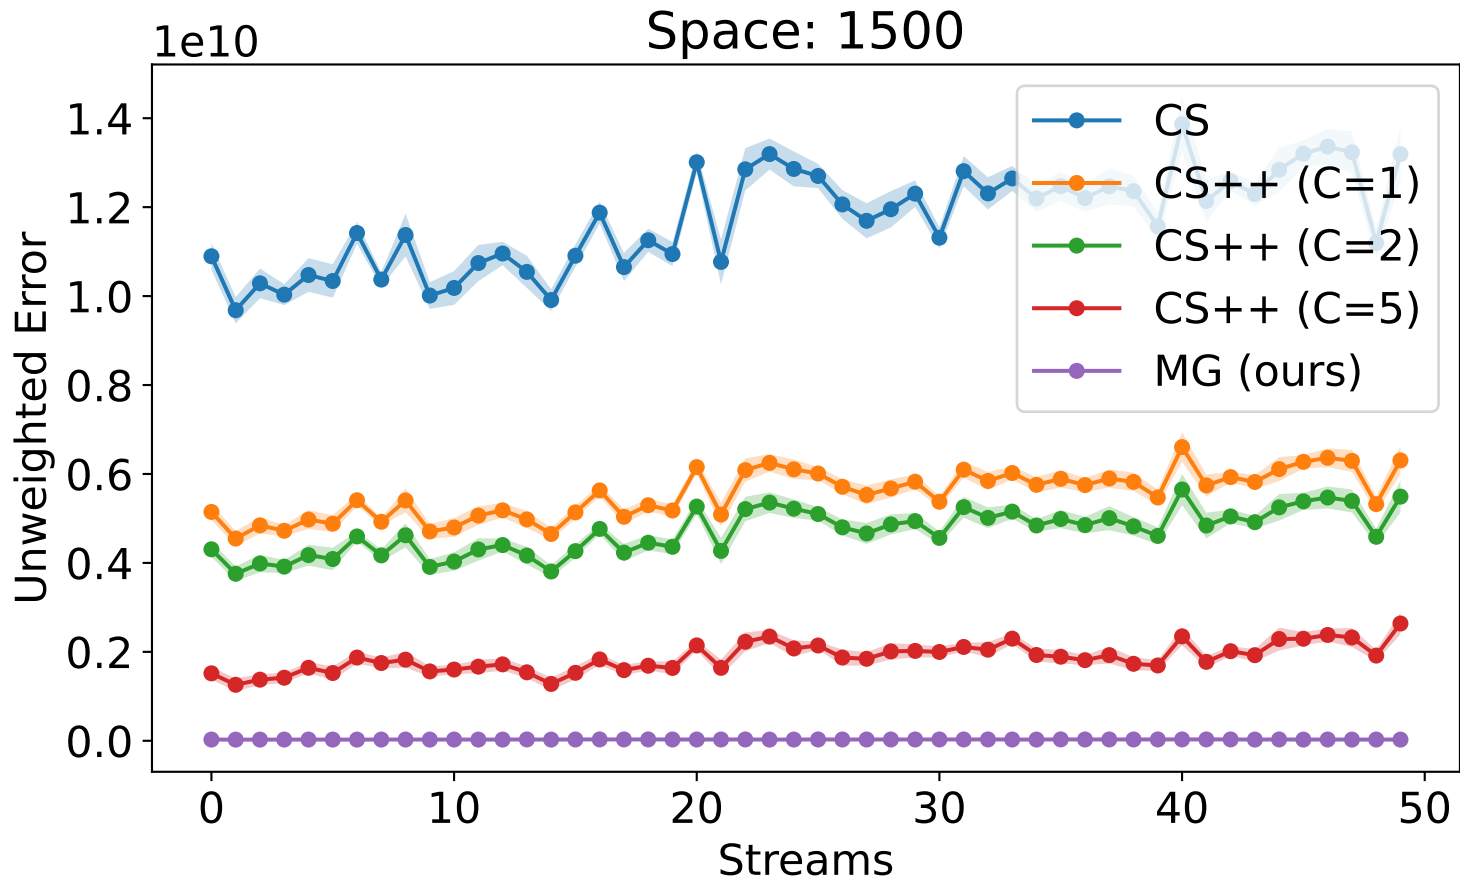

Supplement: supplementary_material [file attachment]

Space: 300

1e7

Unweighted Error

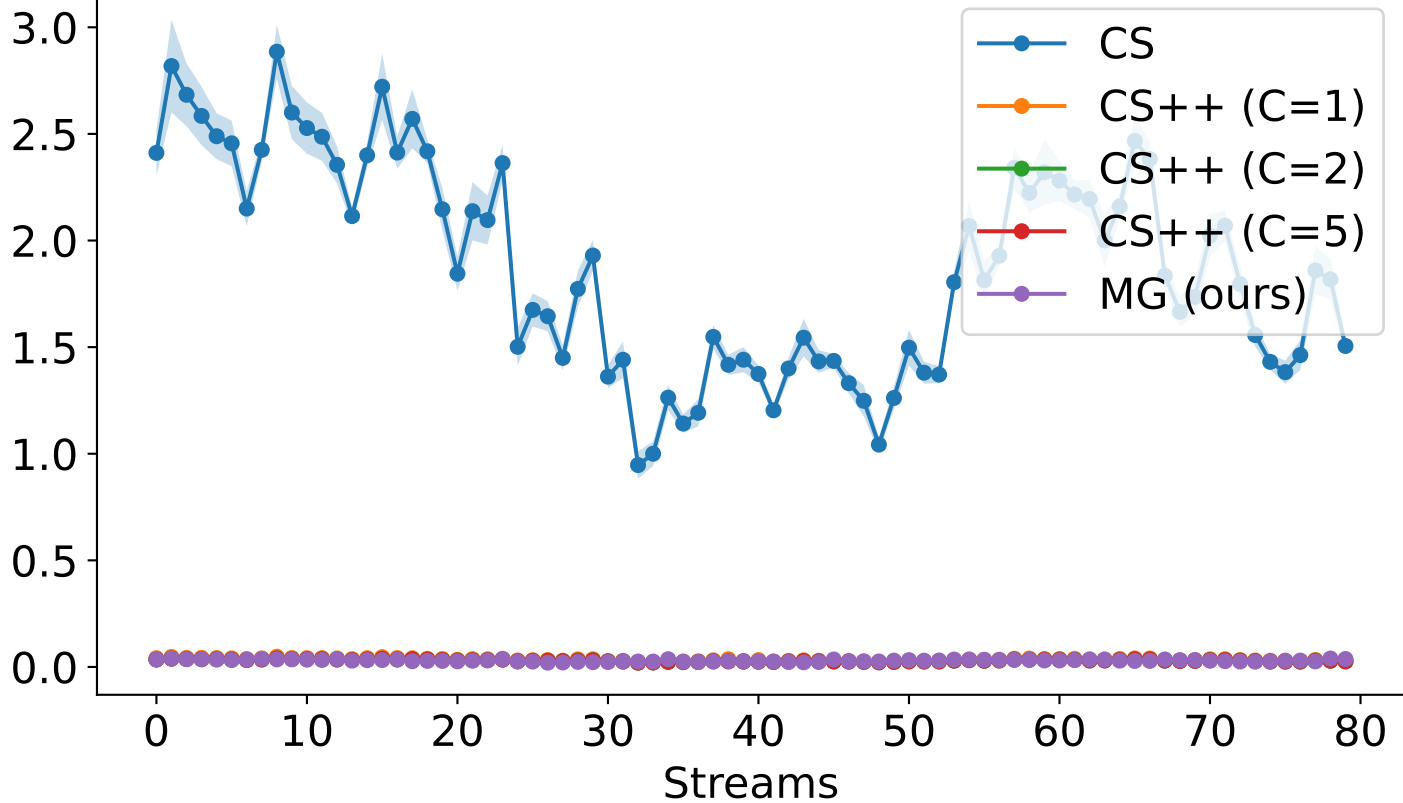

Supplement: supplementary_material [file attachment]

Rank: 100

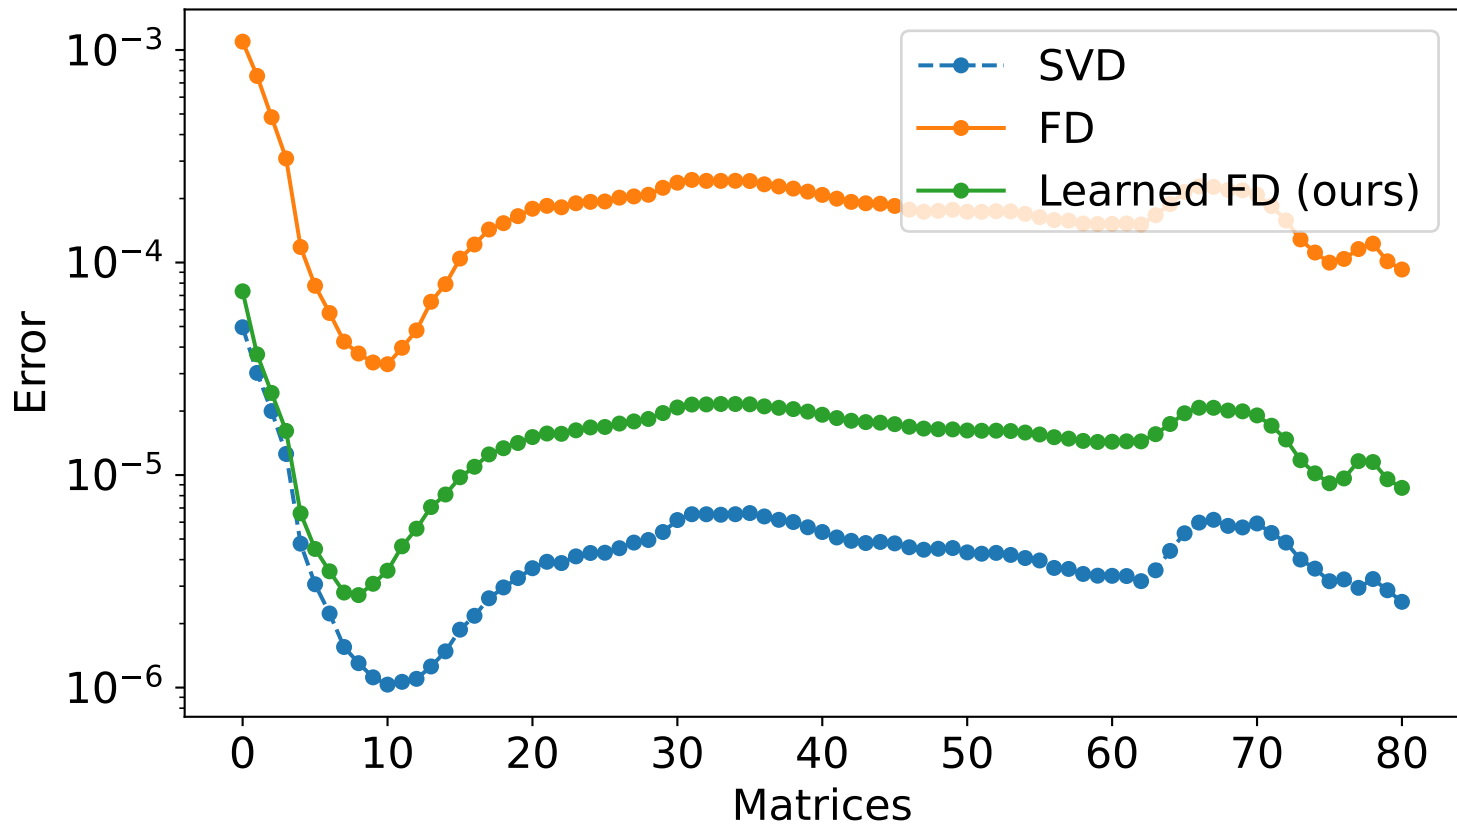

Supplement: supplementary_material [file attachment]

Rank: 120

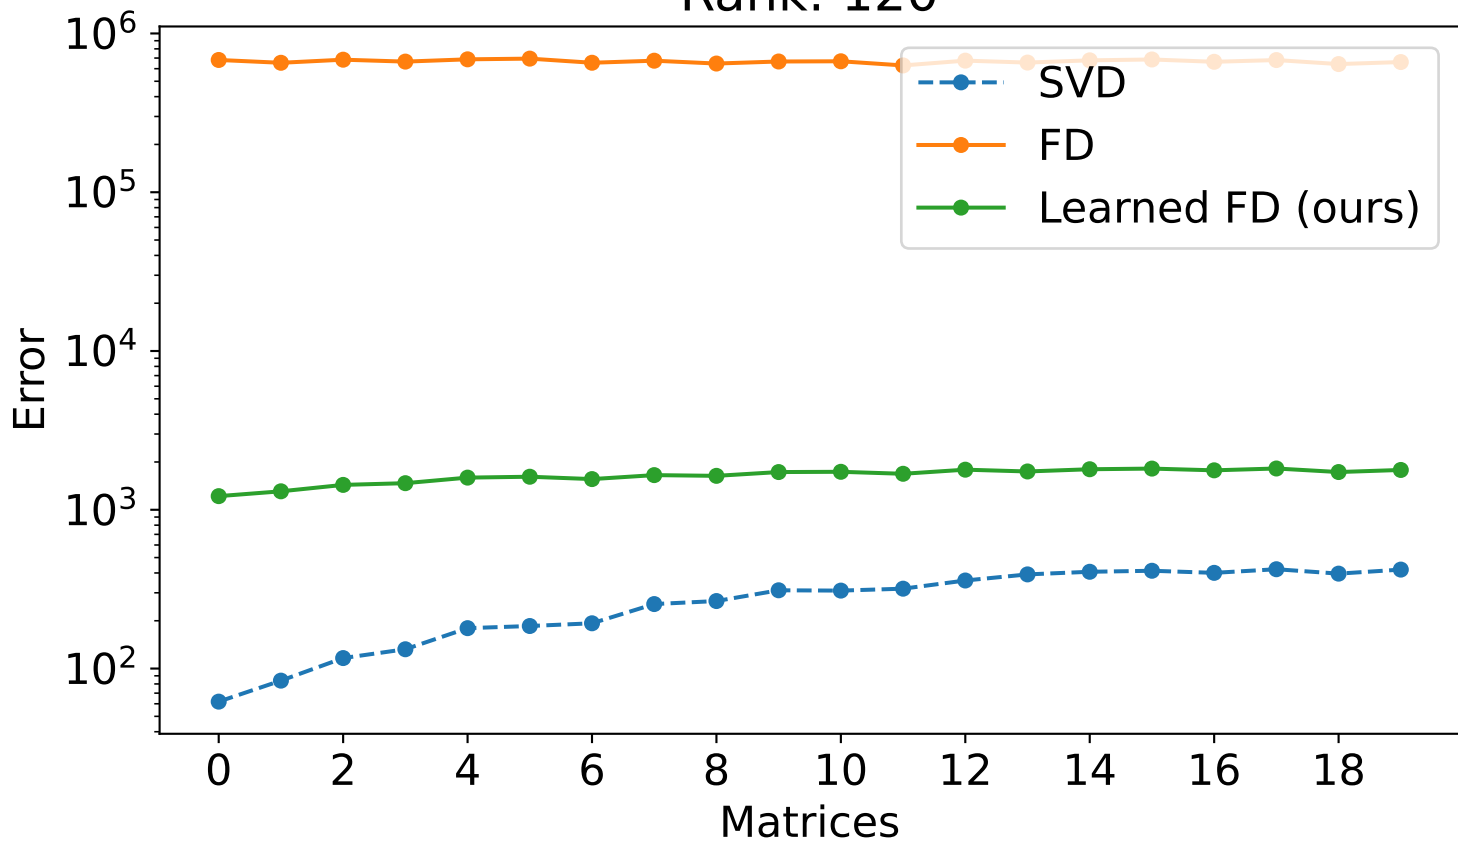

Supplement: supplementary_material [file attachment]

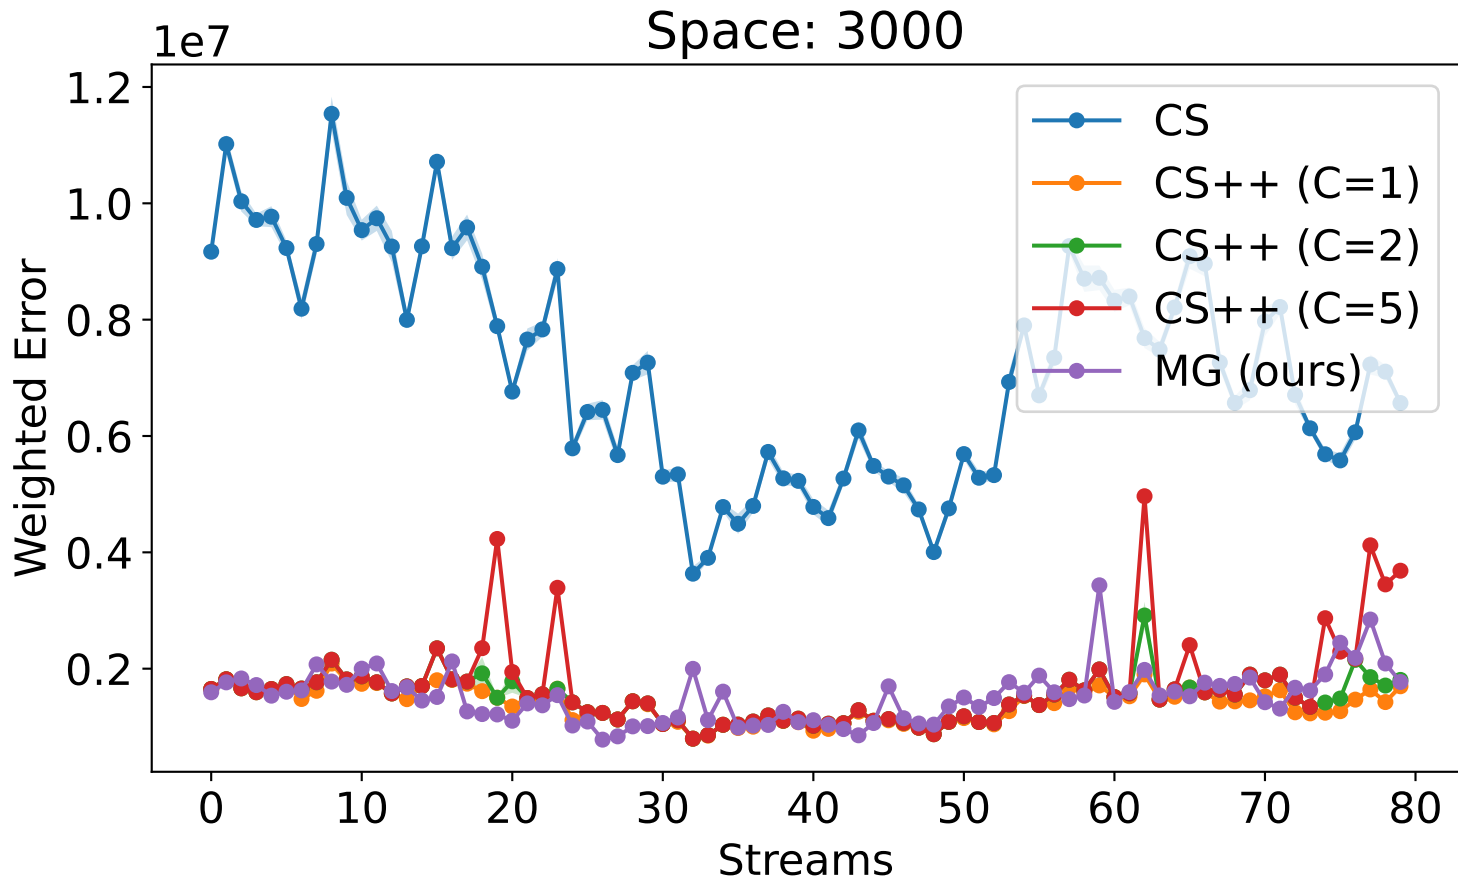

Supplement: supplementary_material [file attachment]

Rank: 20

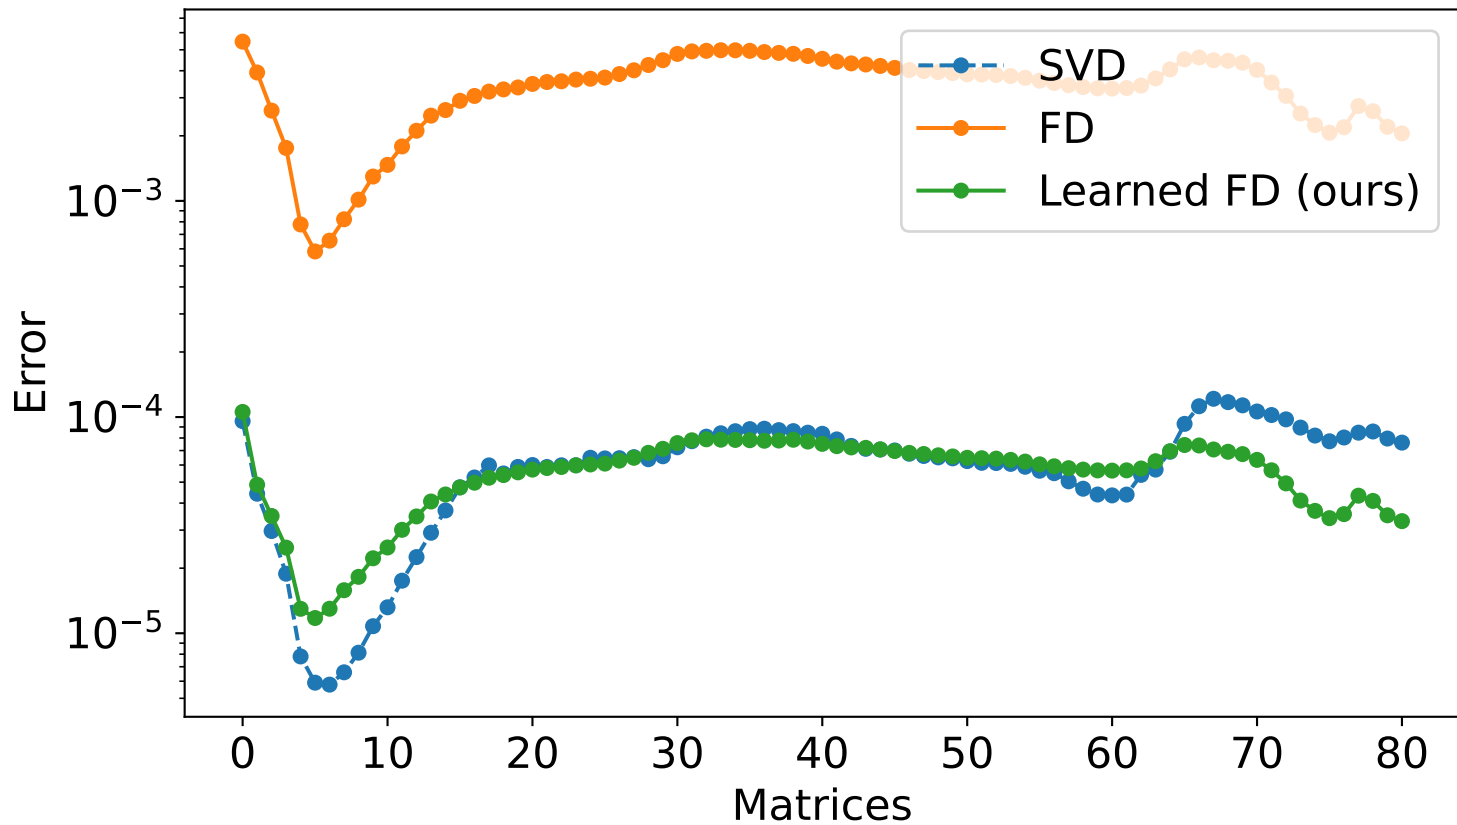

Supplement: supplementary_material [file attachment]

Space: 3000

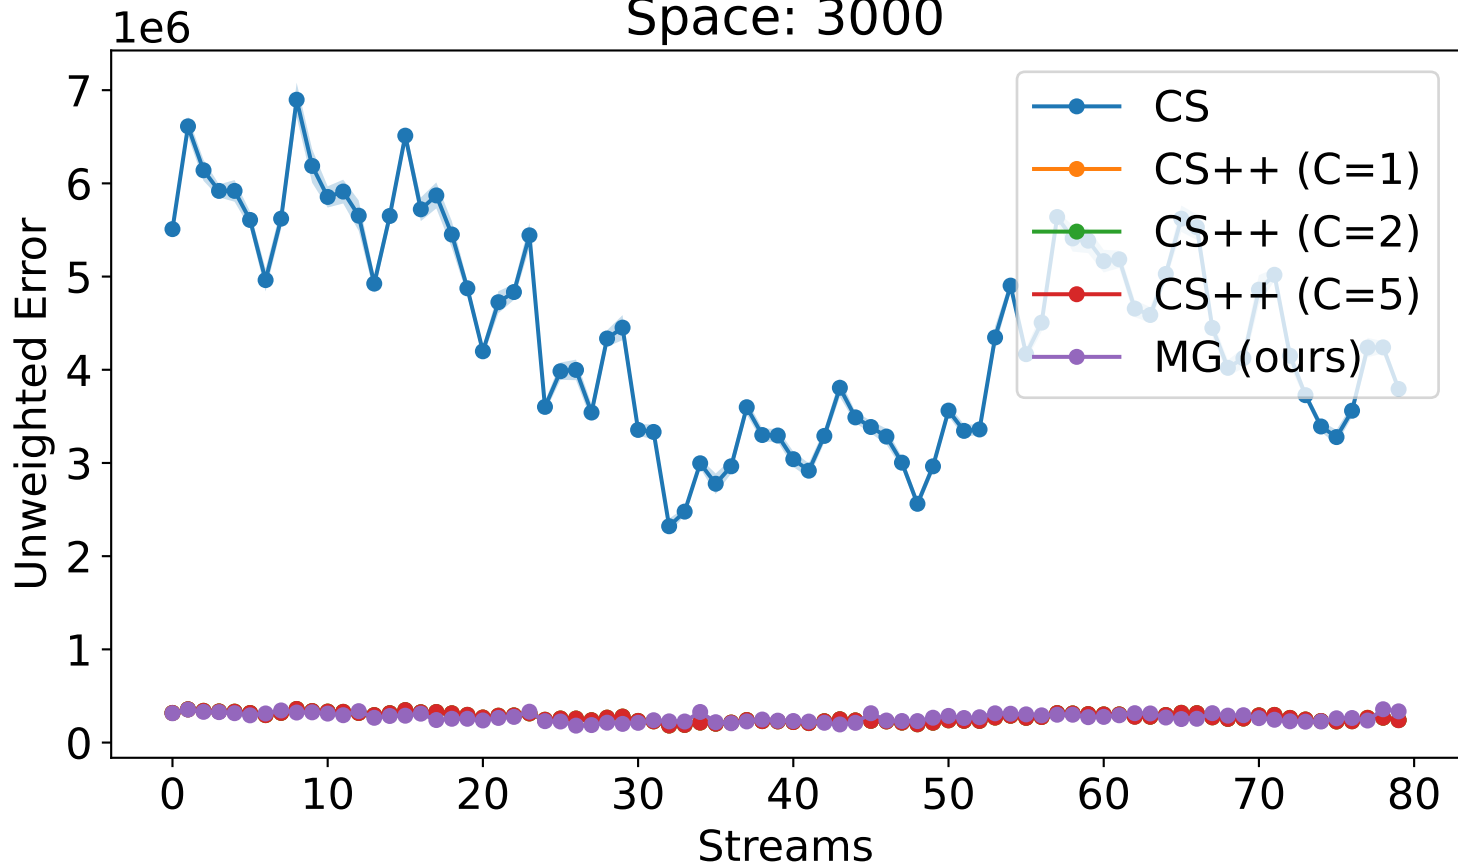

Supplement: supplementary_material [file attachment]

Rank: 40

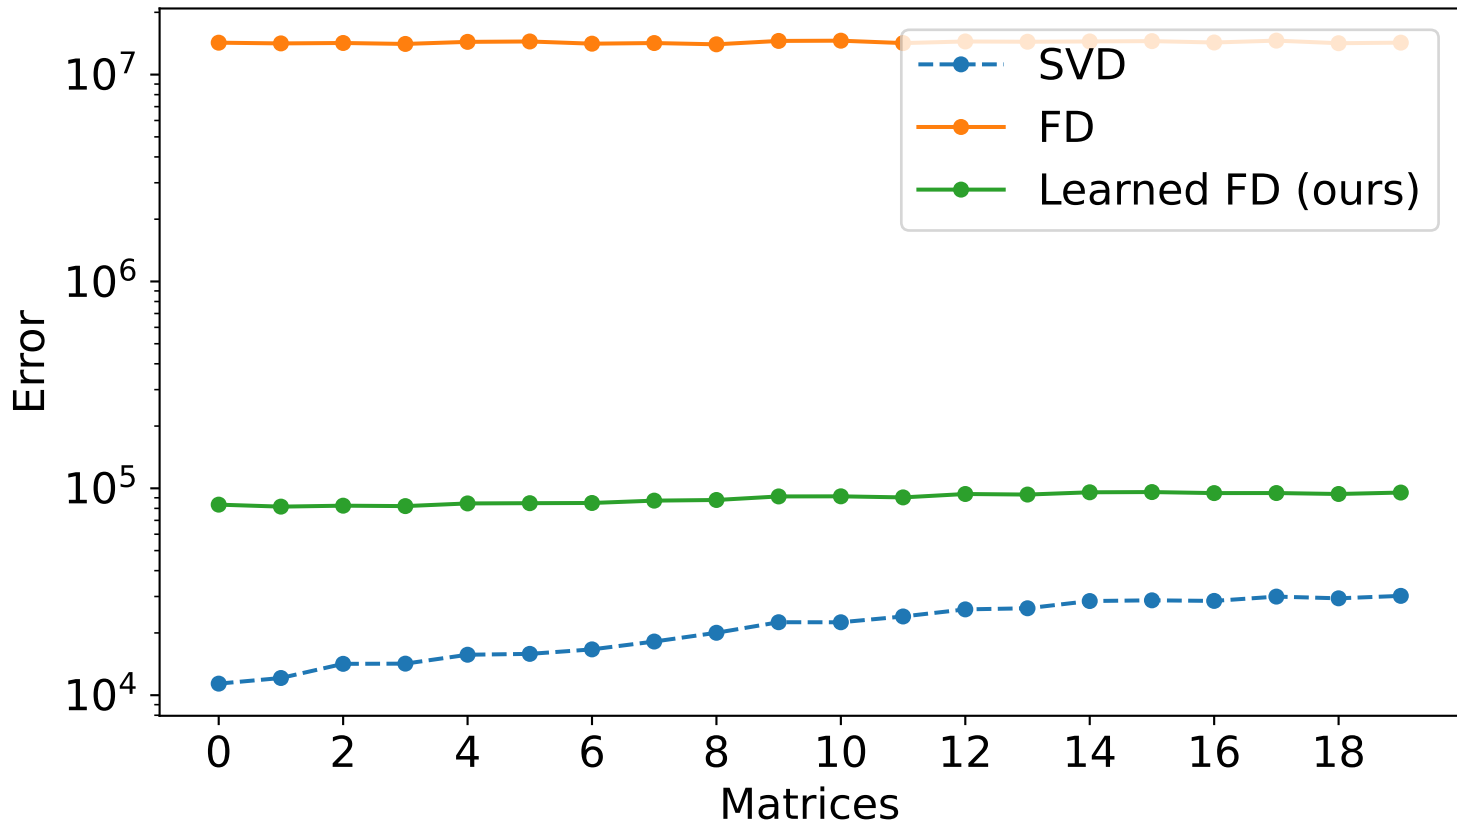

Supplement: supplementary_material [file attachment]

1e11

Space: 750

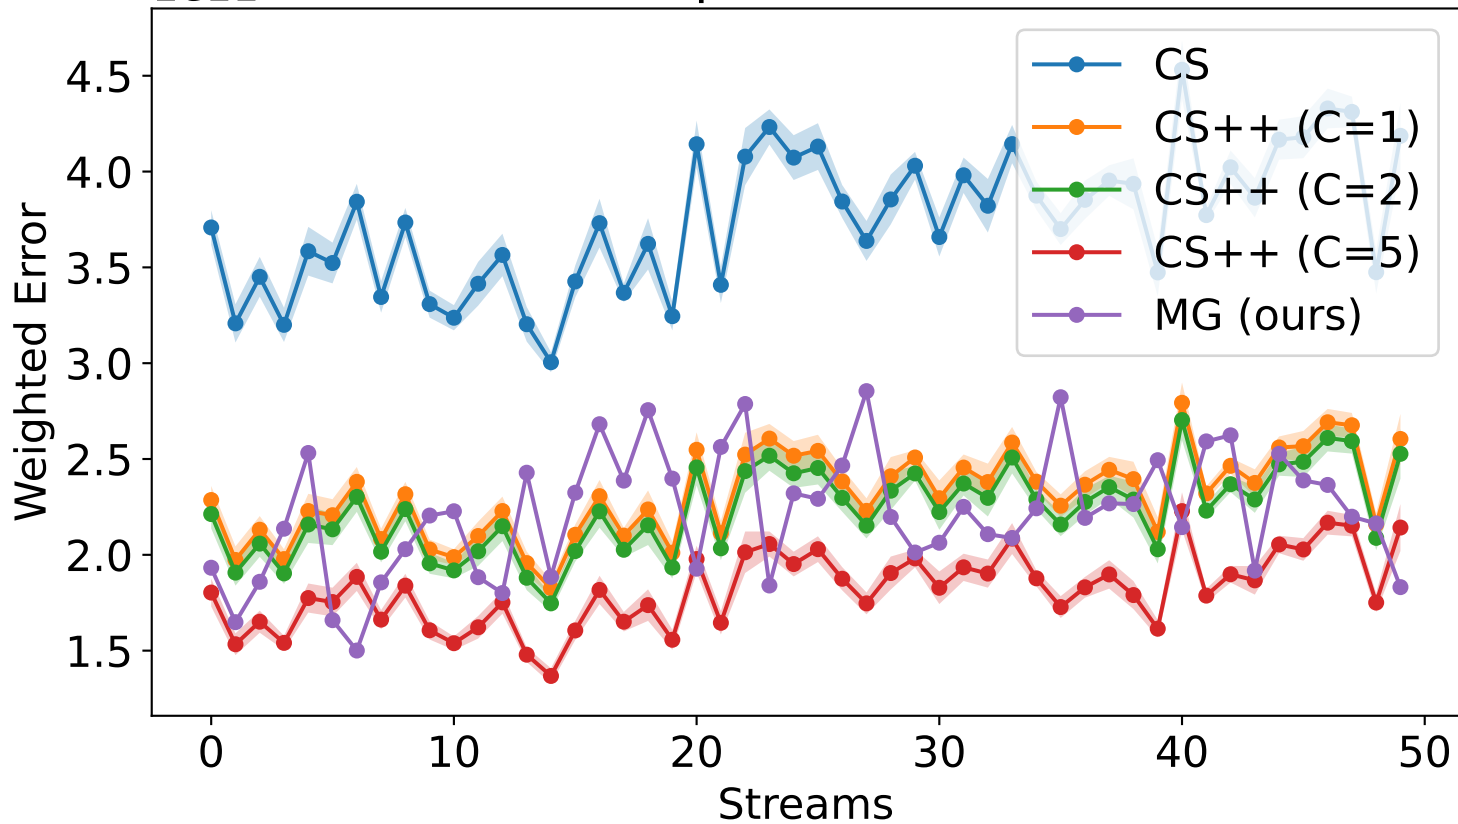

Supplement: supplementary_material [file attachment]

Rank: 160

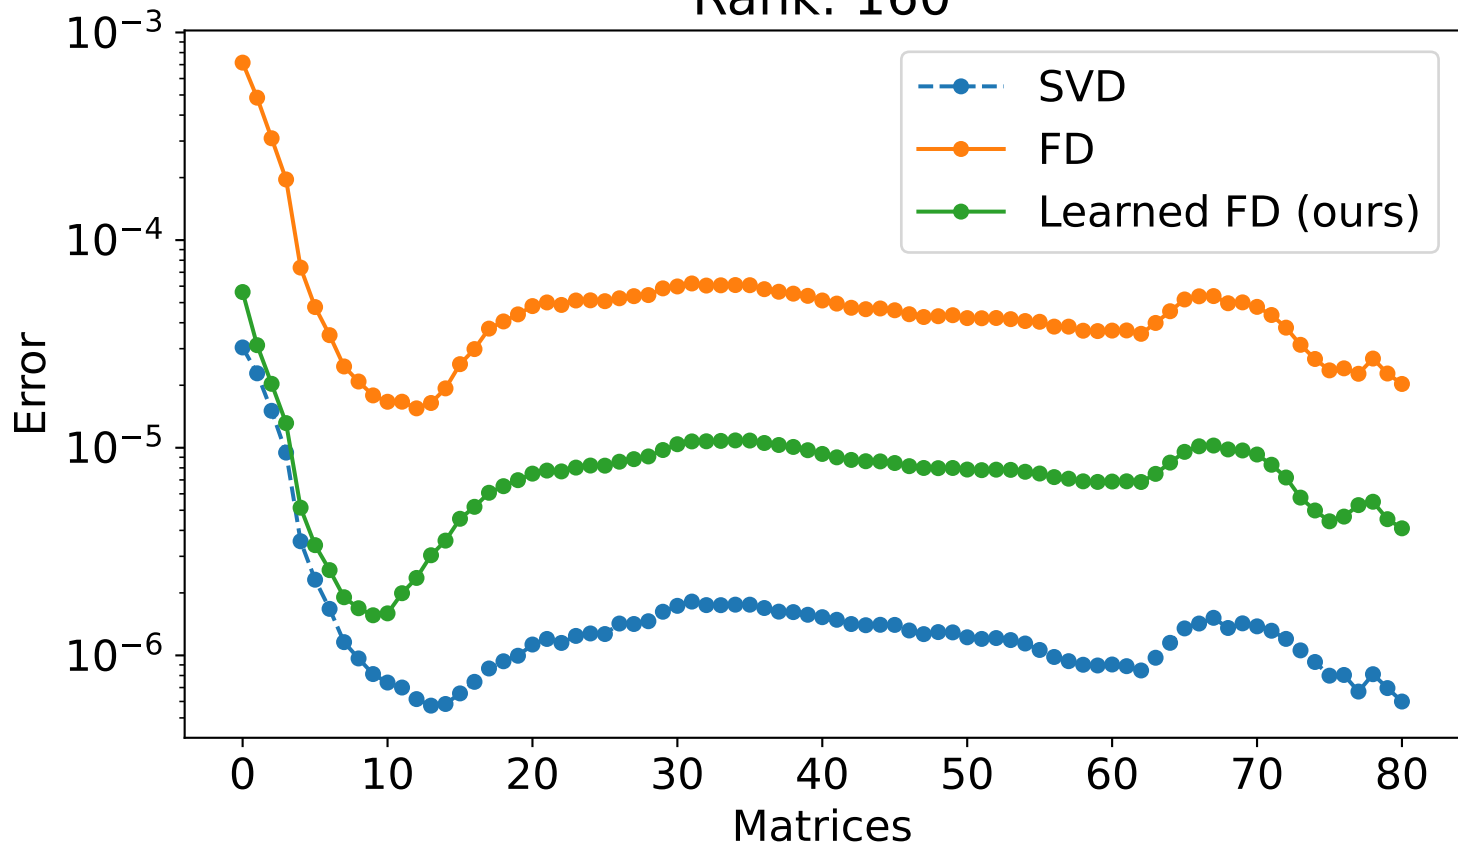

Supplement: supplementary_material [file attachment]

Rank: 60

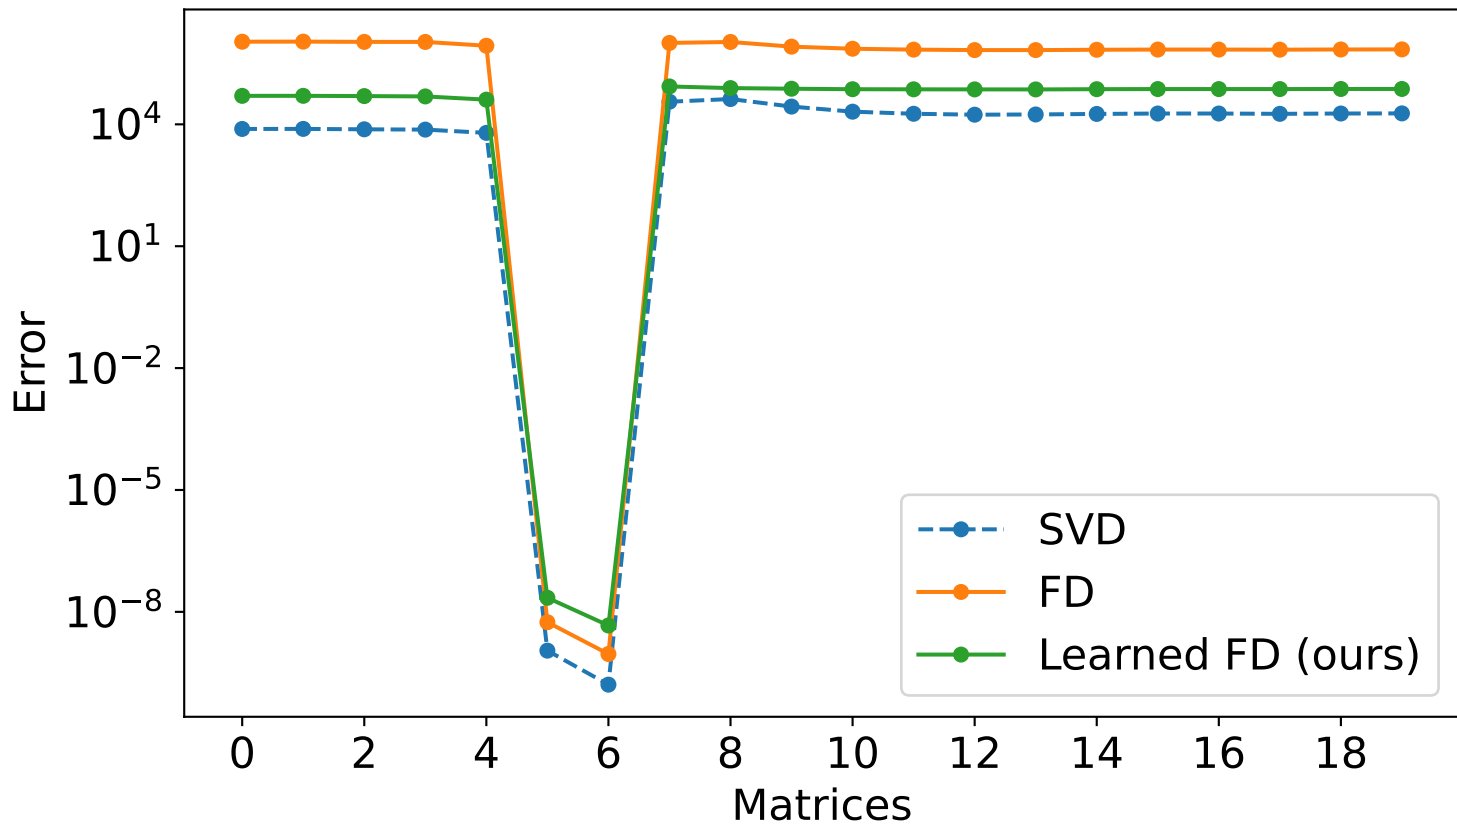

Supplement: supplementary_material [file attachment]

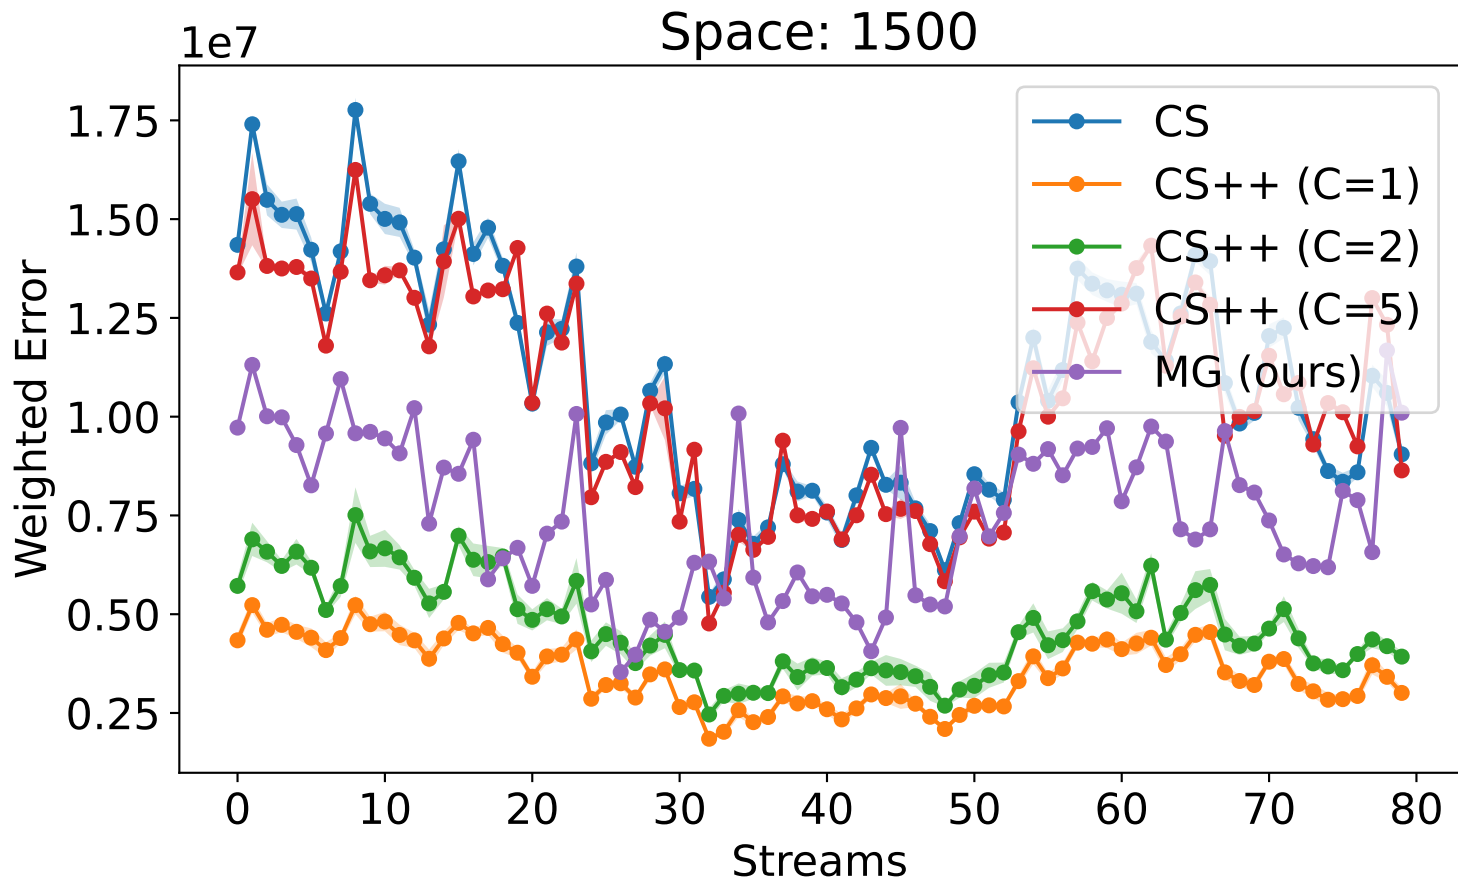

Supplement: supplementary_material [file attachment]

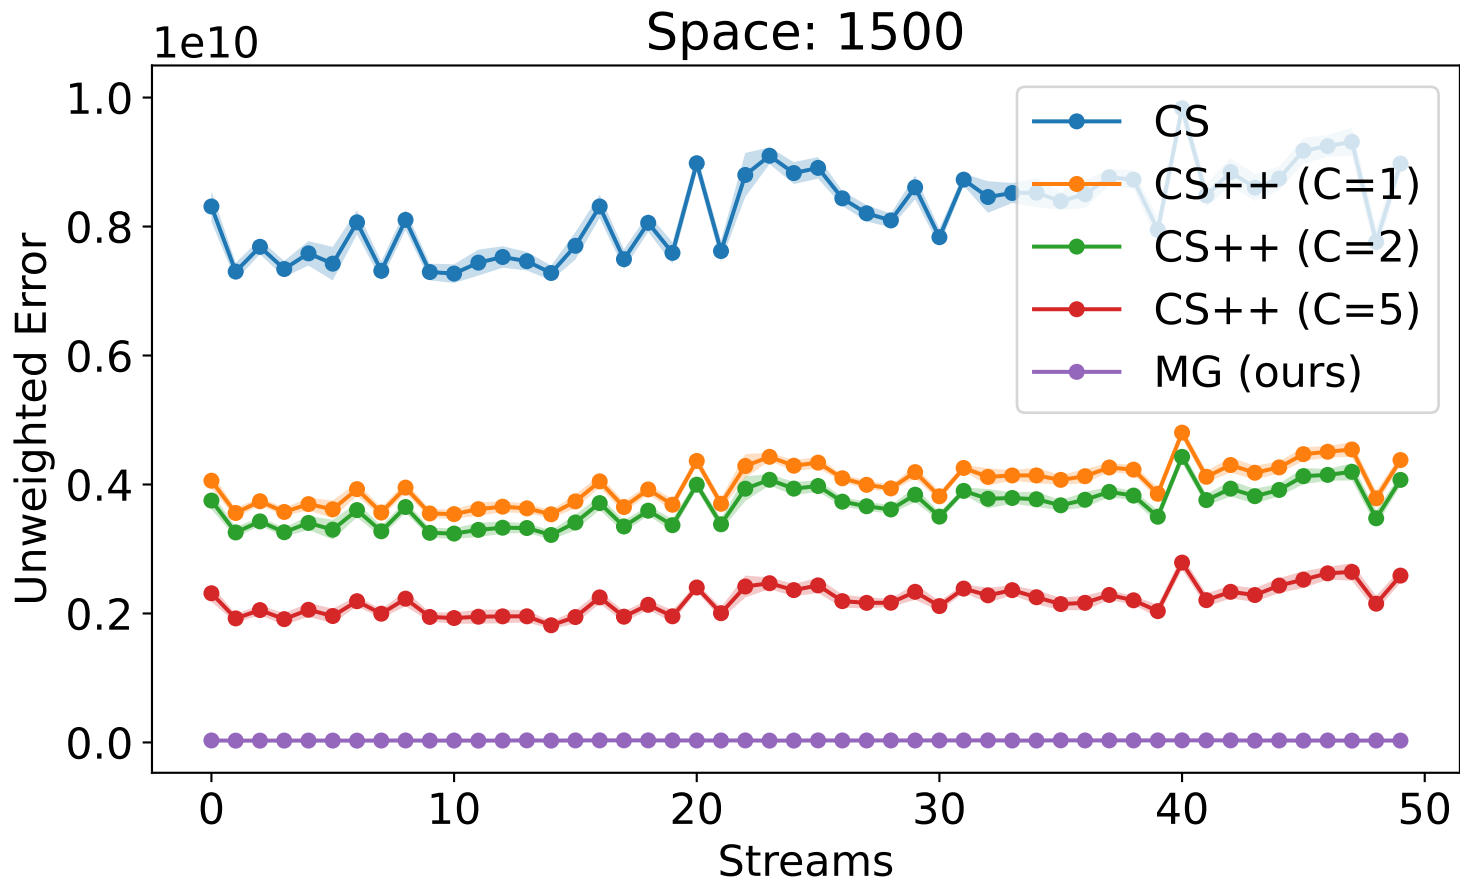

Supplement: supplementary_material [file attachment]

Rank: 160

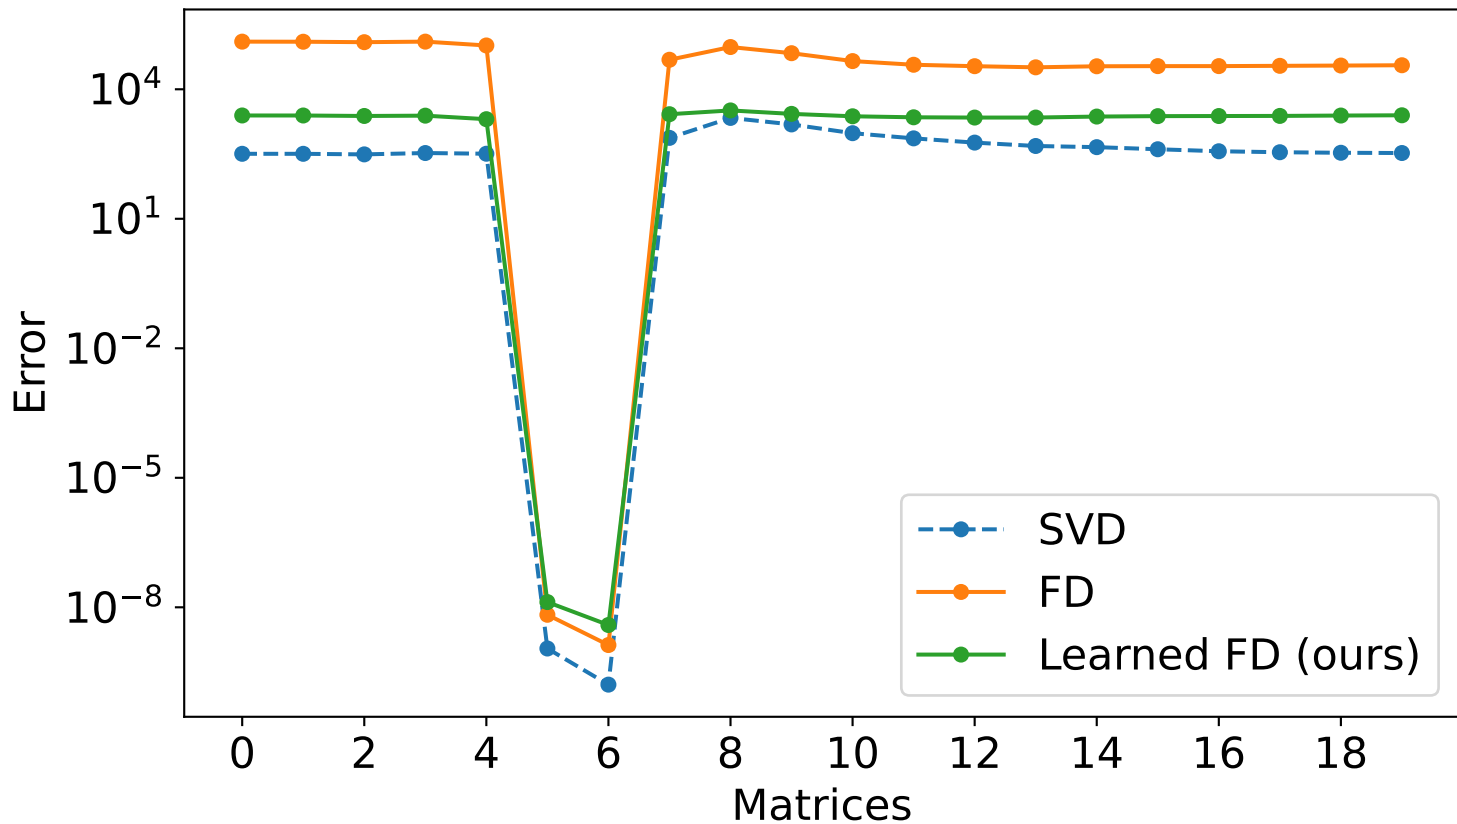

Supplement: supplementary_material [file attachment]

1e12

Space: 300

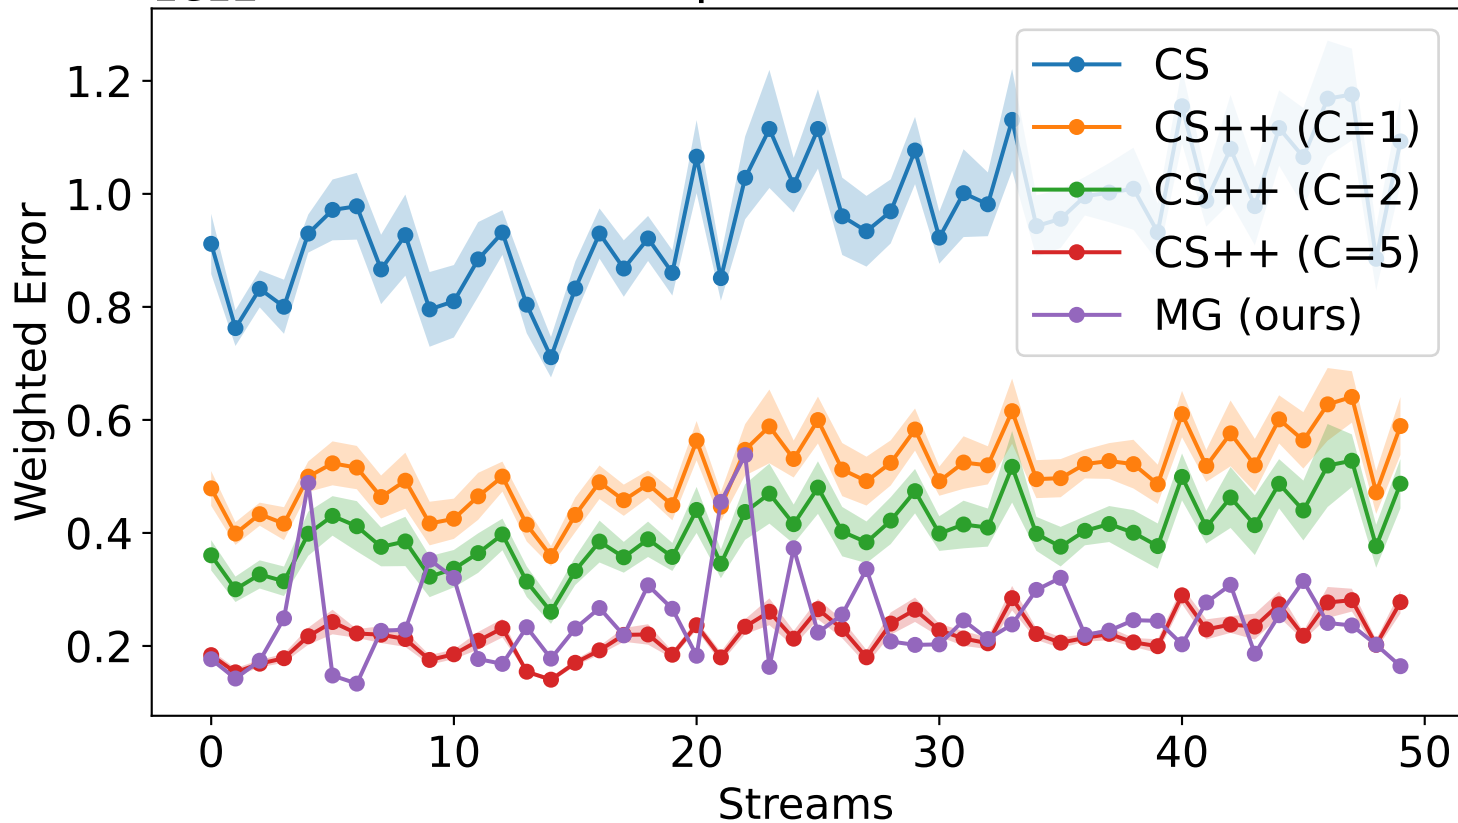

Supplement: supplementary_material [file attachment]

Rank: 120

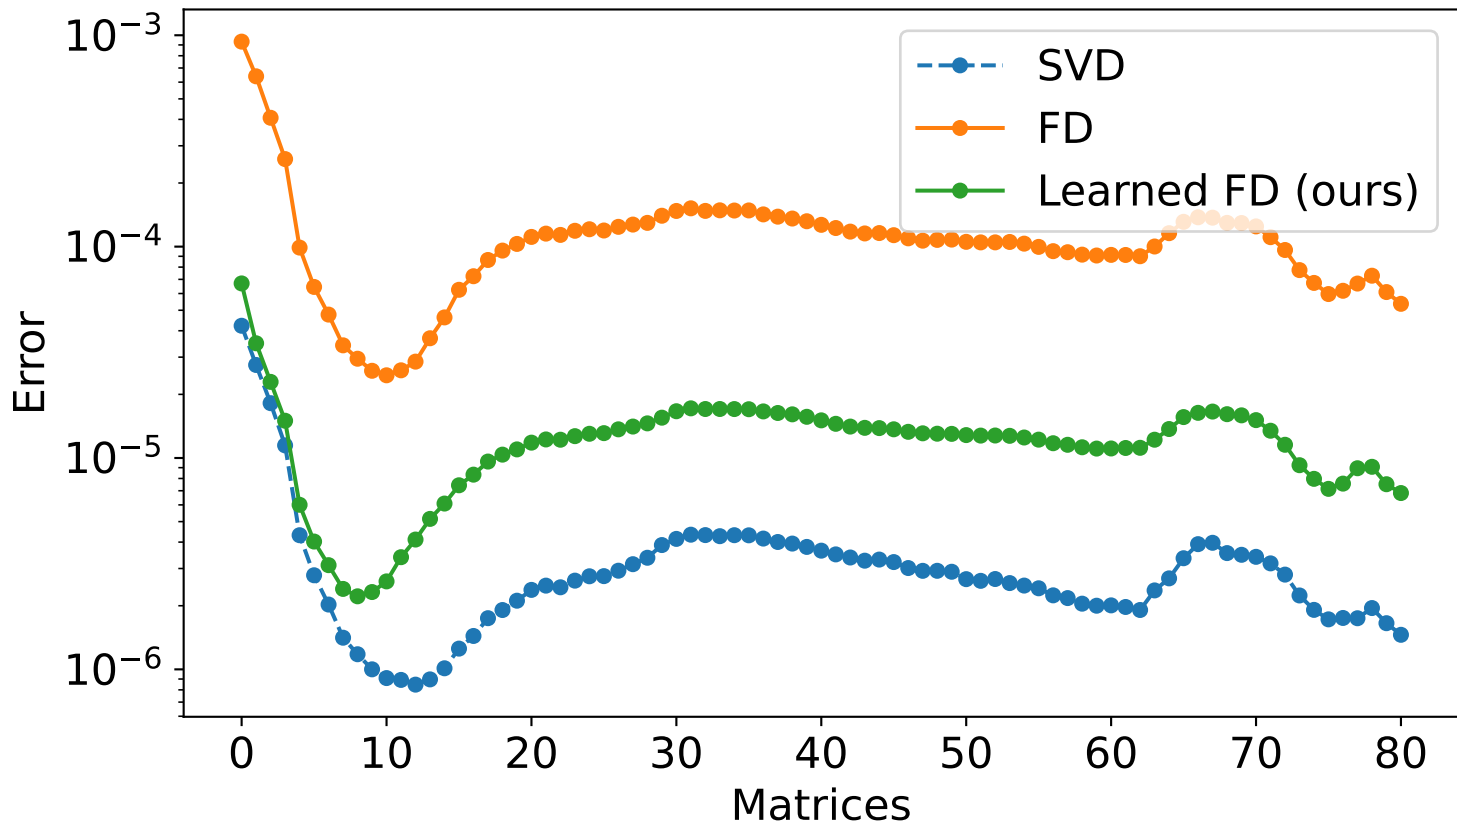

Supplement: supplementary_material [file attachment]

# Error/Space Tradeoff

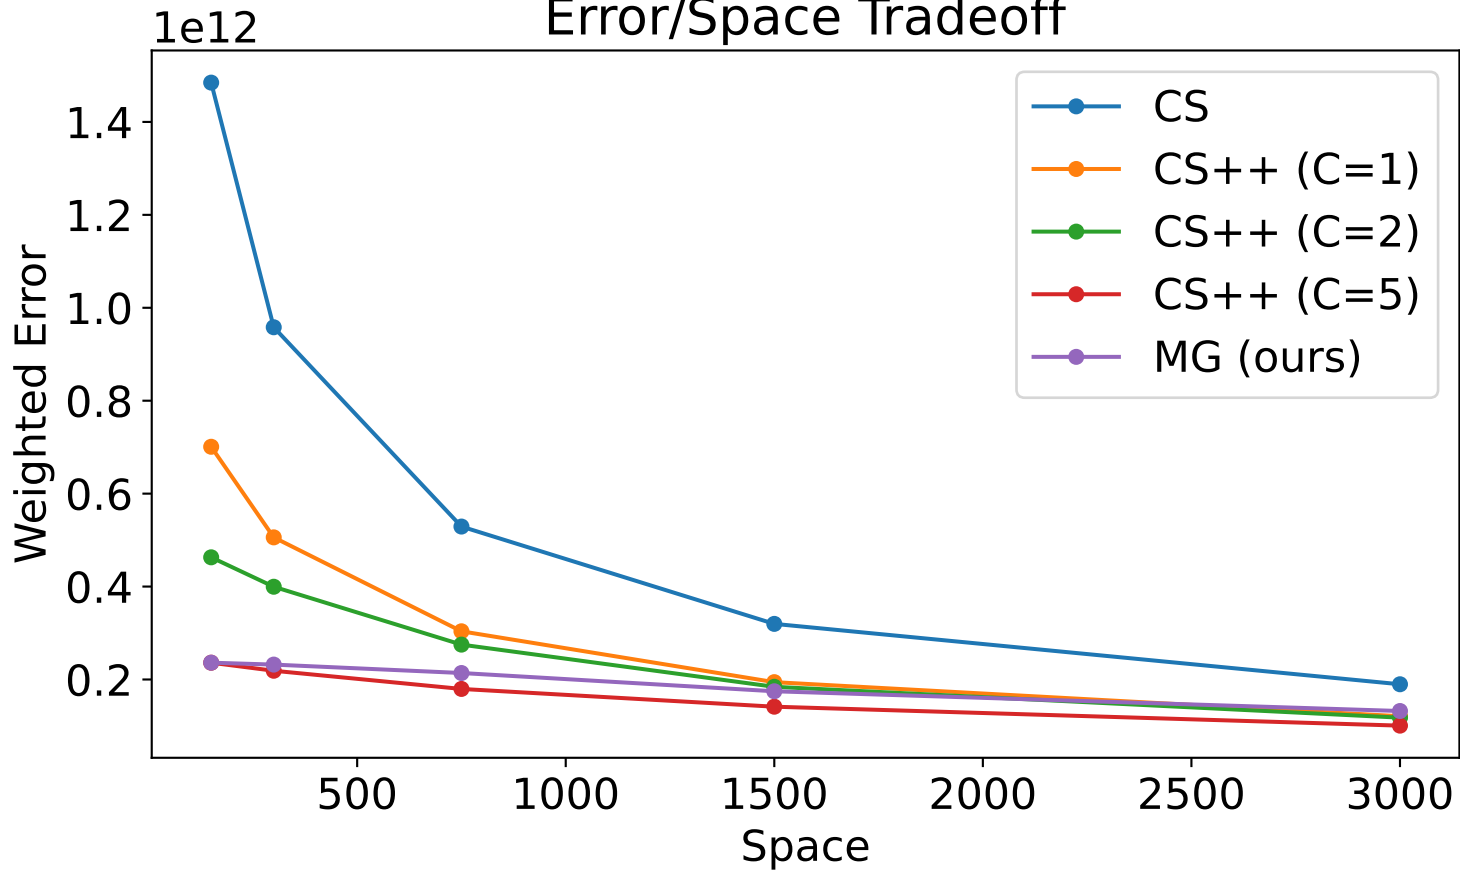

Supplement: supplementary_material [file attachment]

Rank: 40

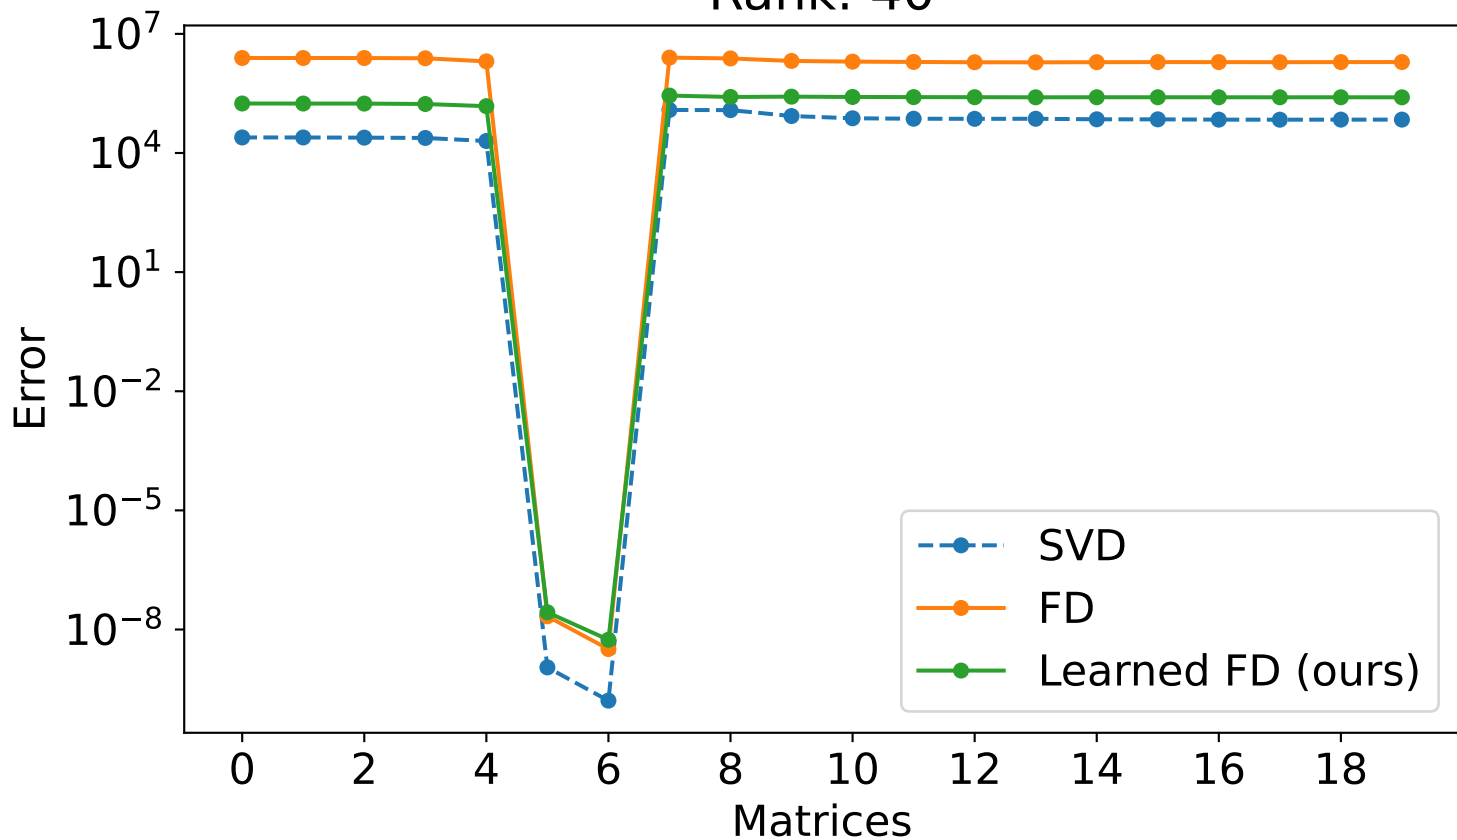

Supplement: supplementary_material [file attachment]

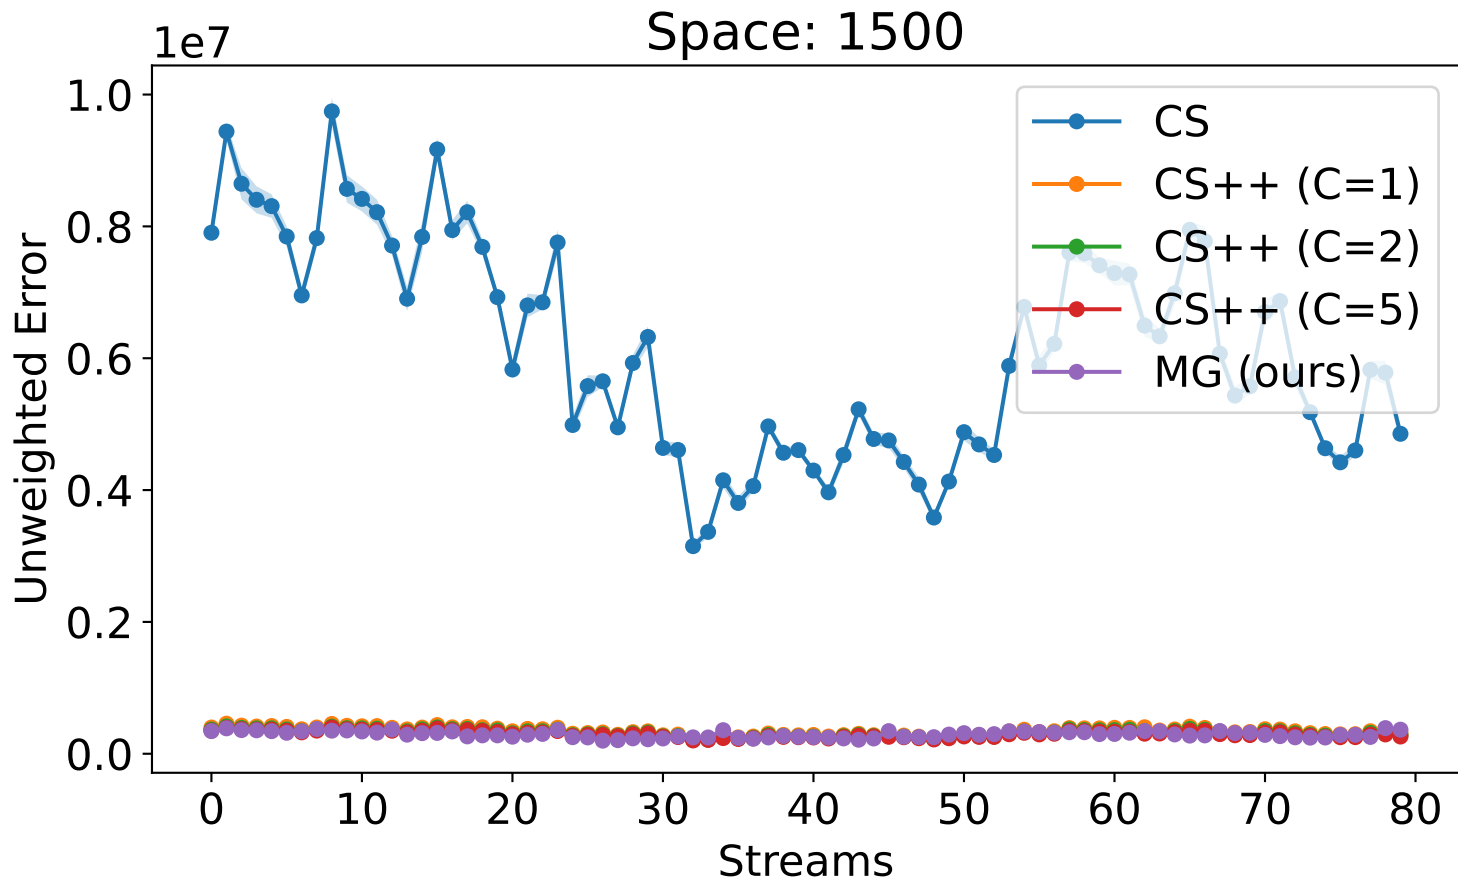

Supplement: supplementary_material [file attachment]

Space: 3000

1e7

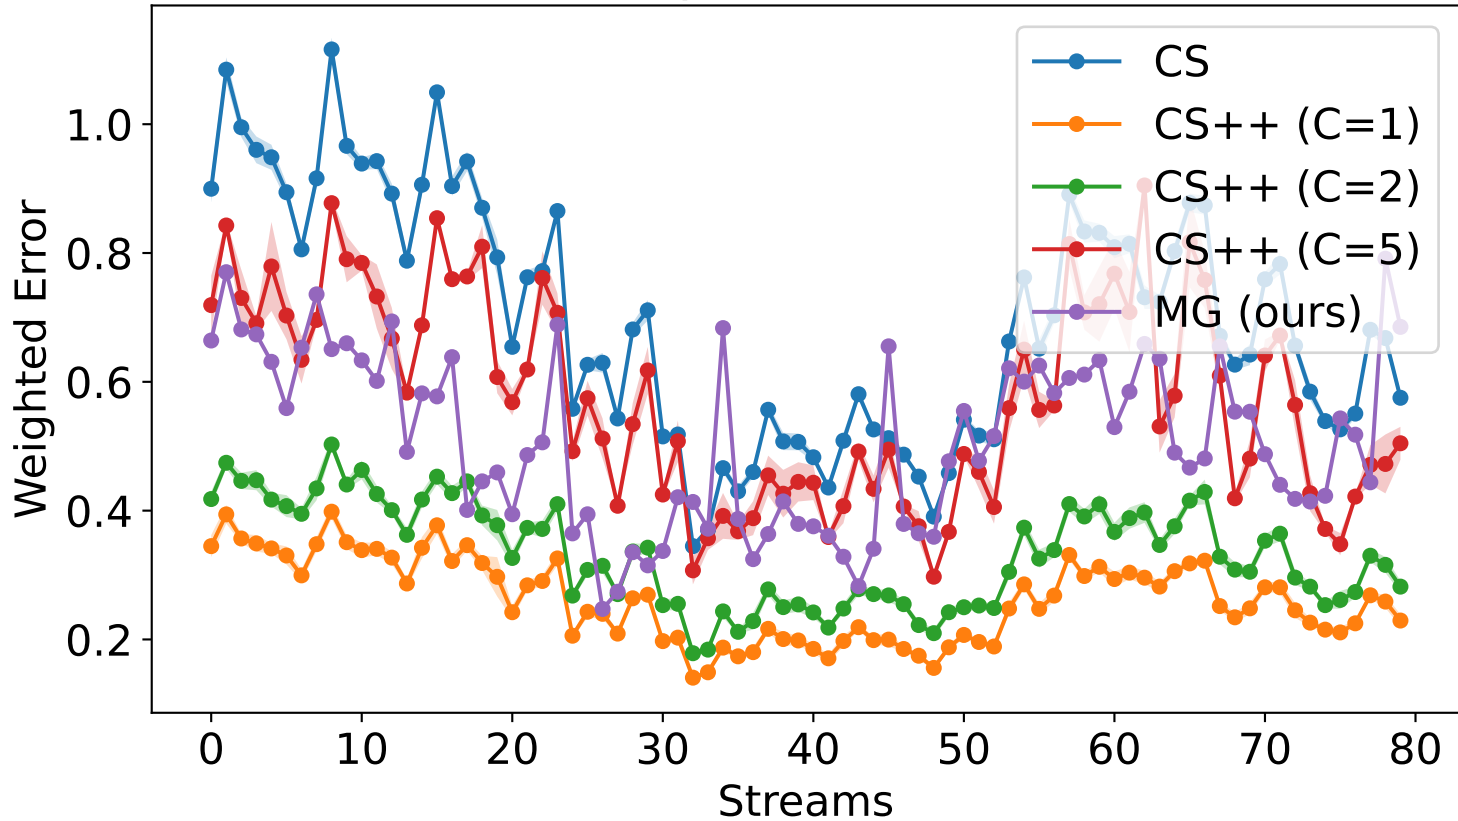

Supplement: supplementary_material [file attachment]

# Error/Rank Tradeoff

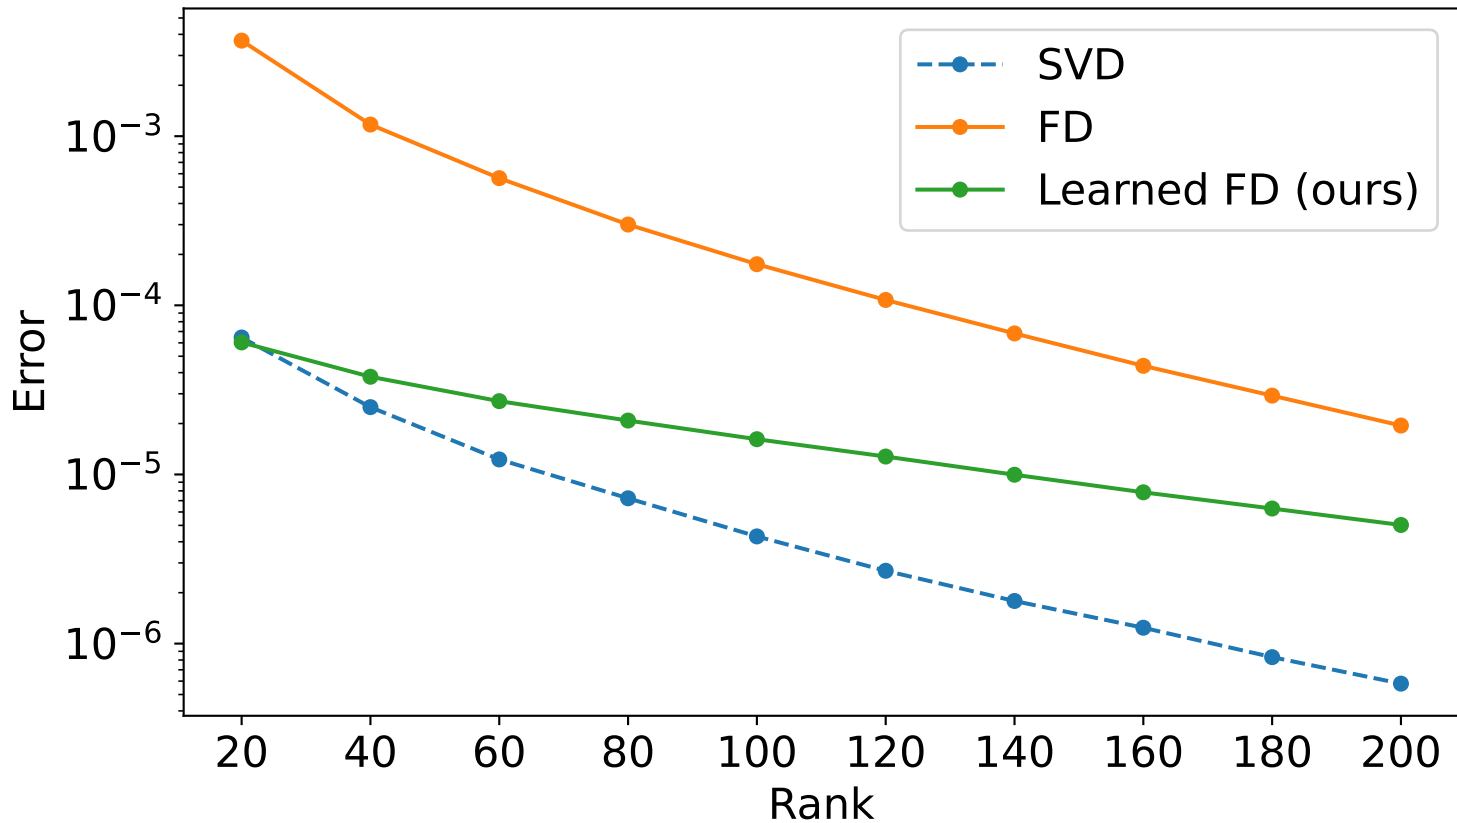

Supplement: supplementary_material [file attachment]

Rank: 120

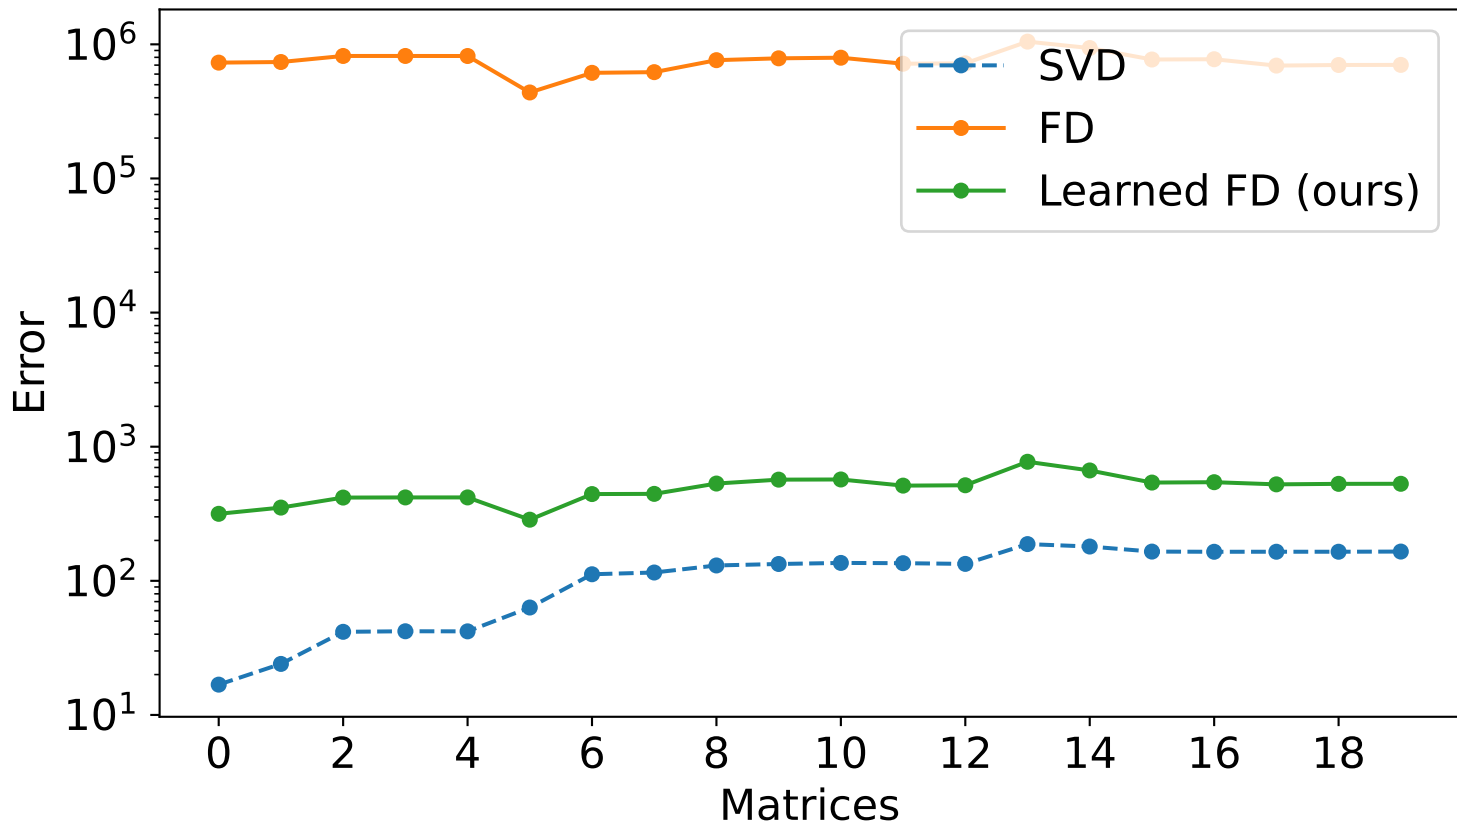

Supplement: supplementary_material [file attachment]

Rank: 60

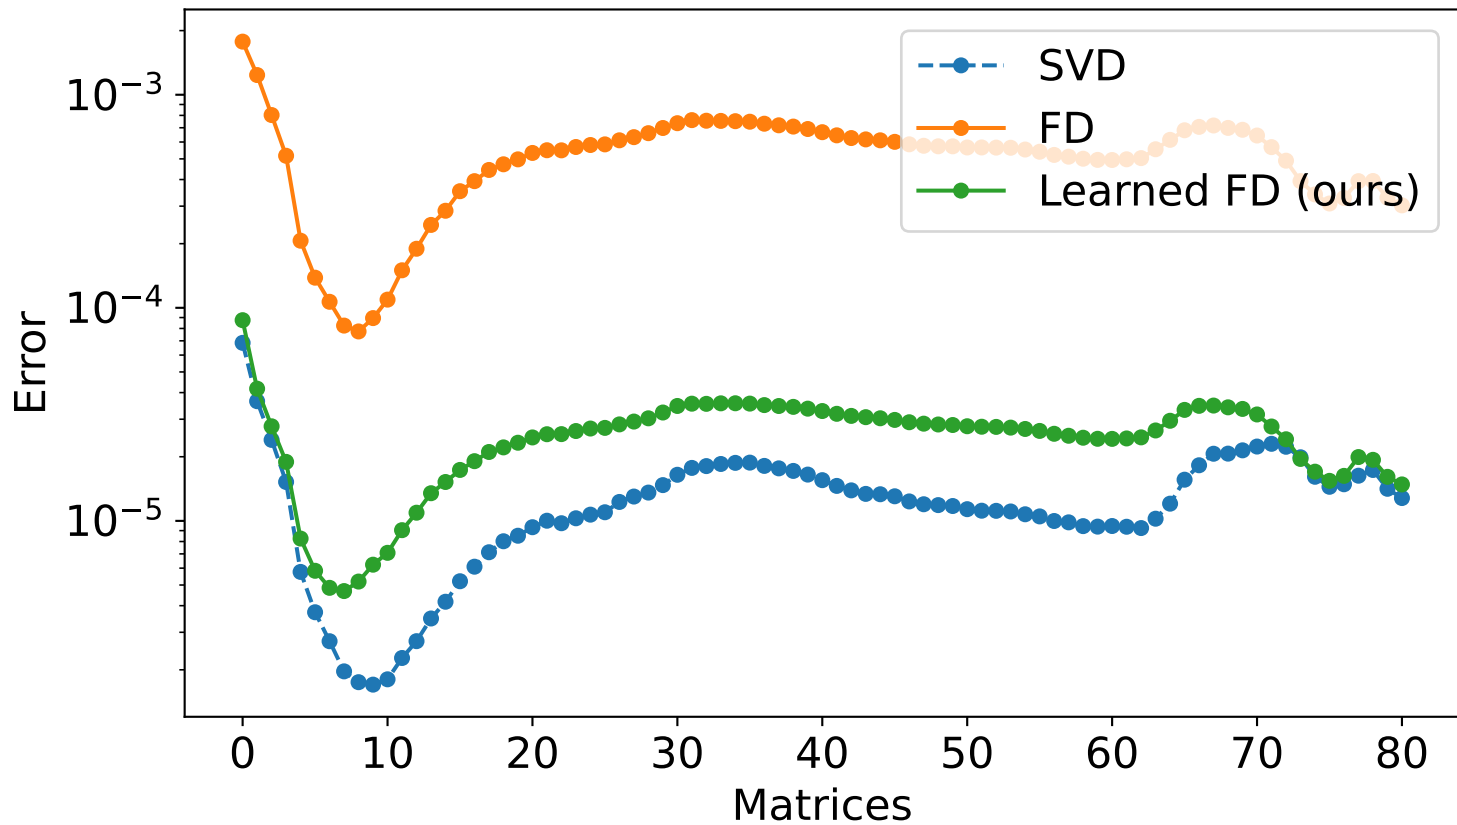

Supplement: supplementary_material [file attachment]

# Friends Log-Log Singular Values

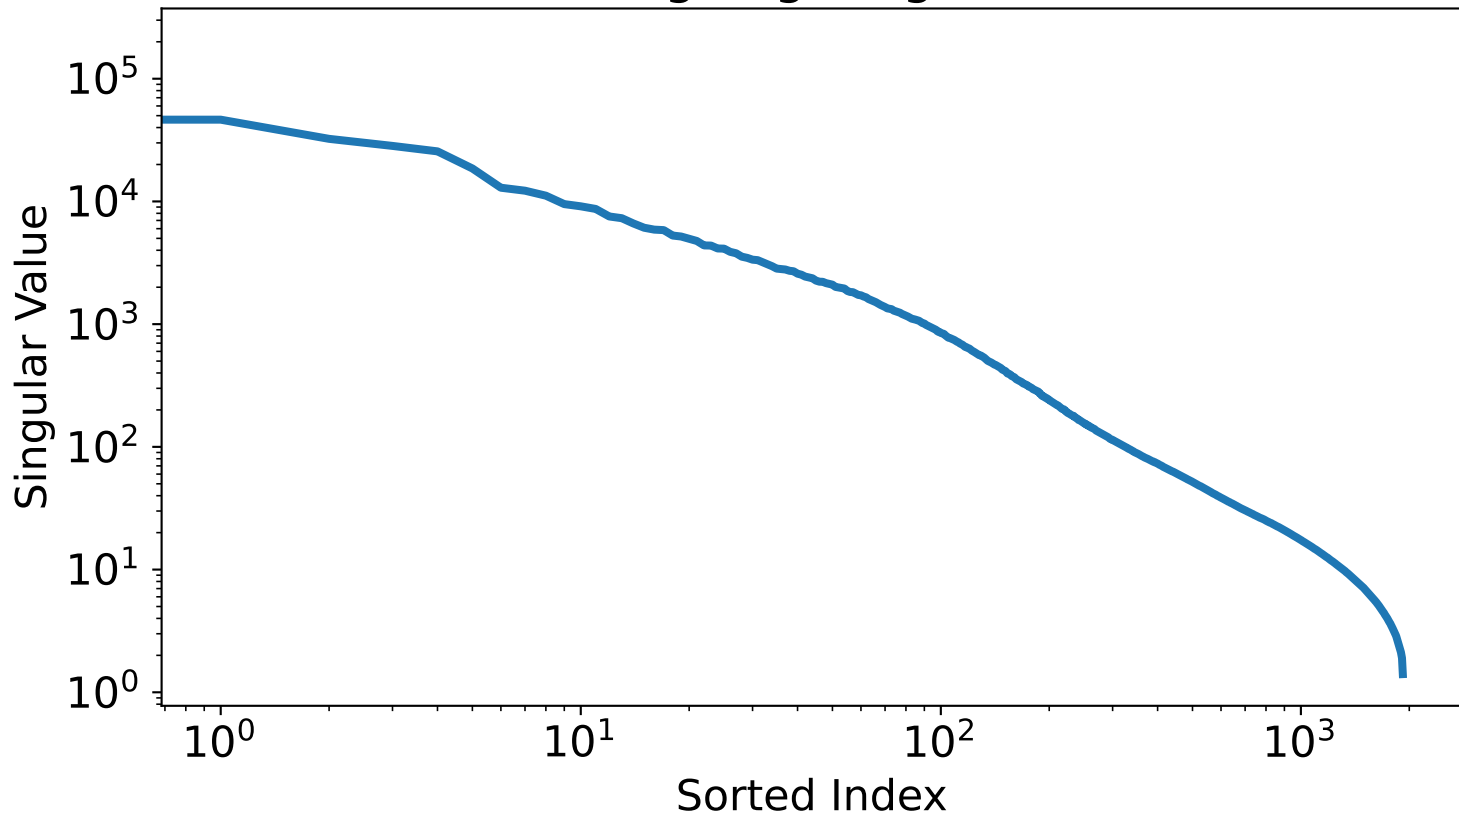

Supplement: supplementary_material [file attachment]

Rank: 80

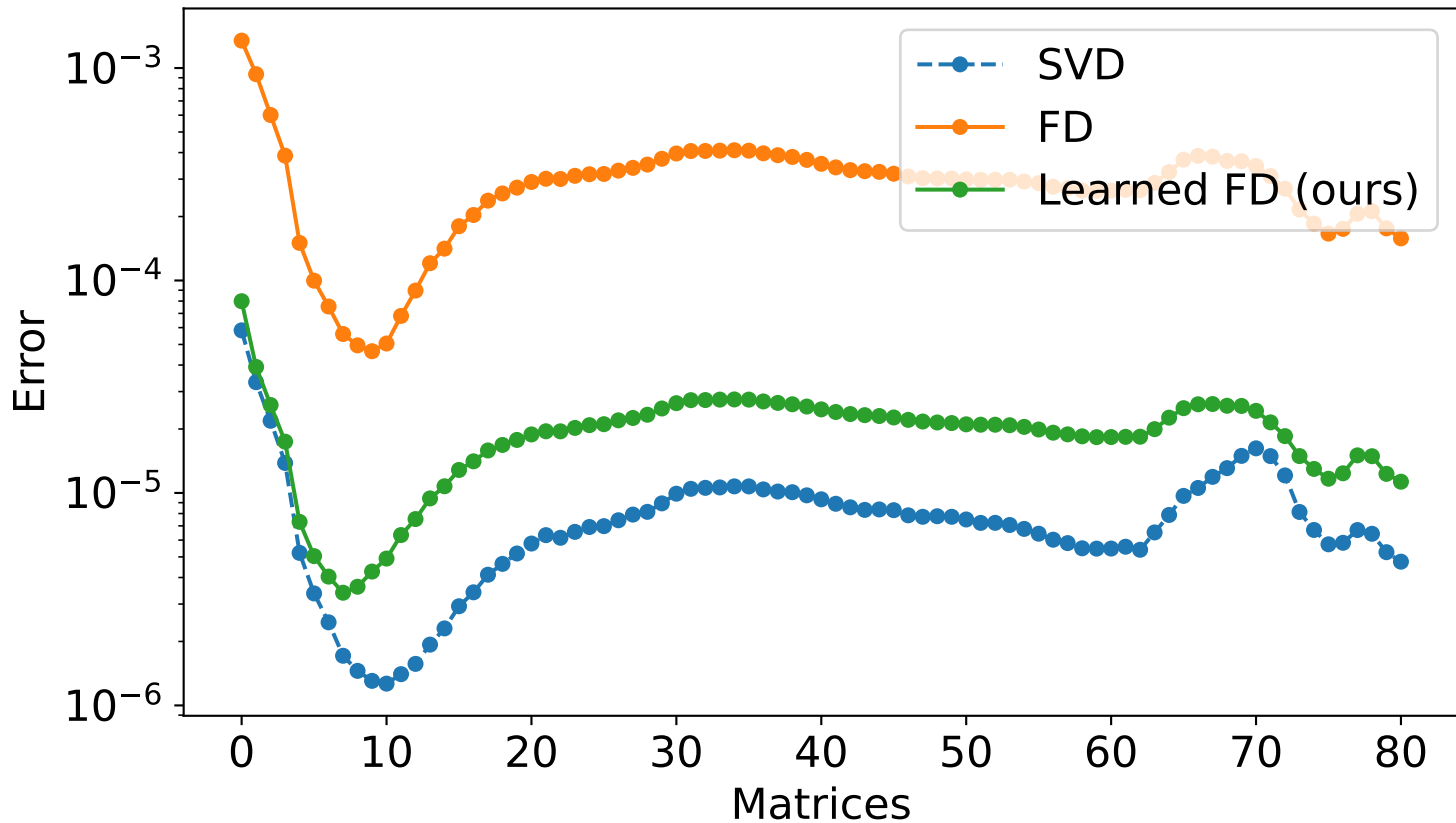

Supplement: supplementary_material [file attachment]

Space: 150

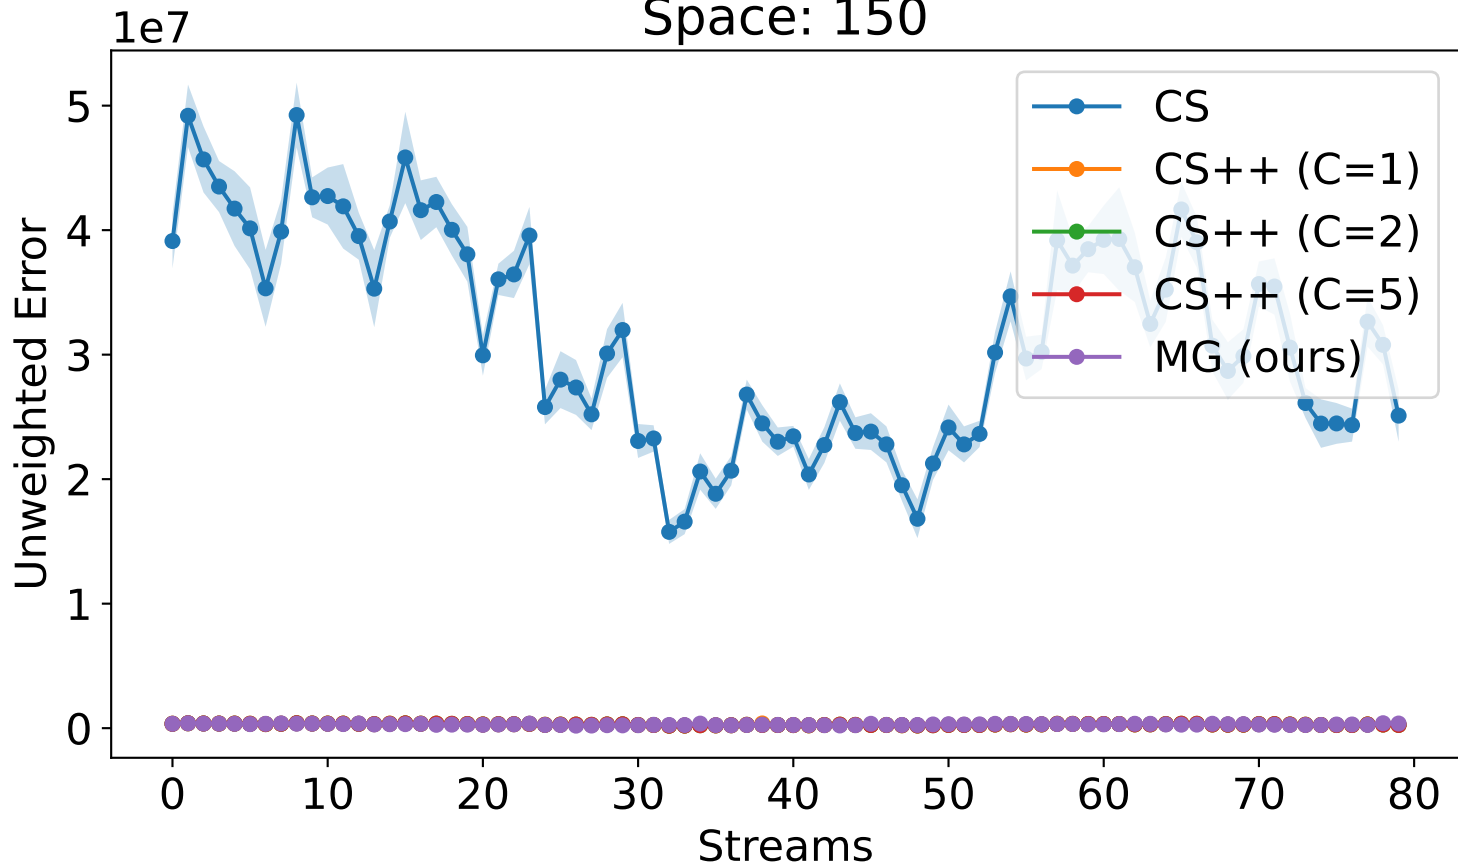

Supplement: supplementary_material [file attachment]

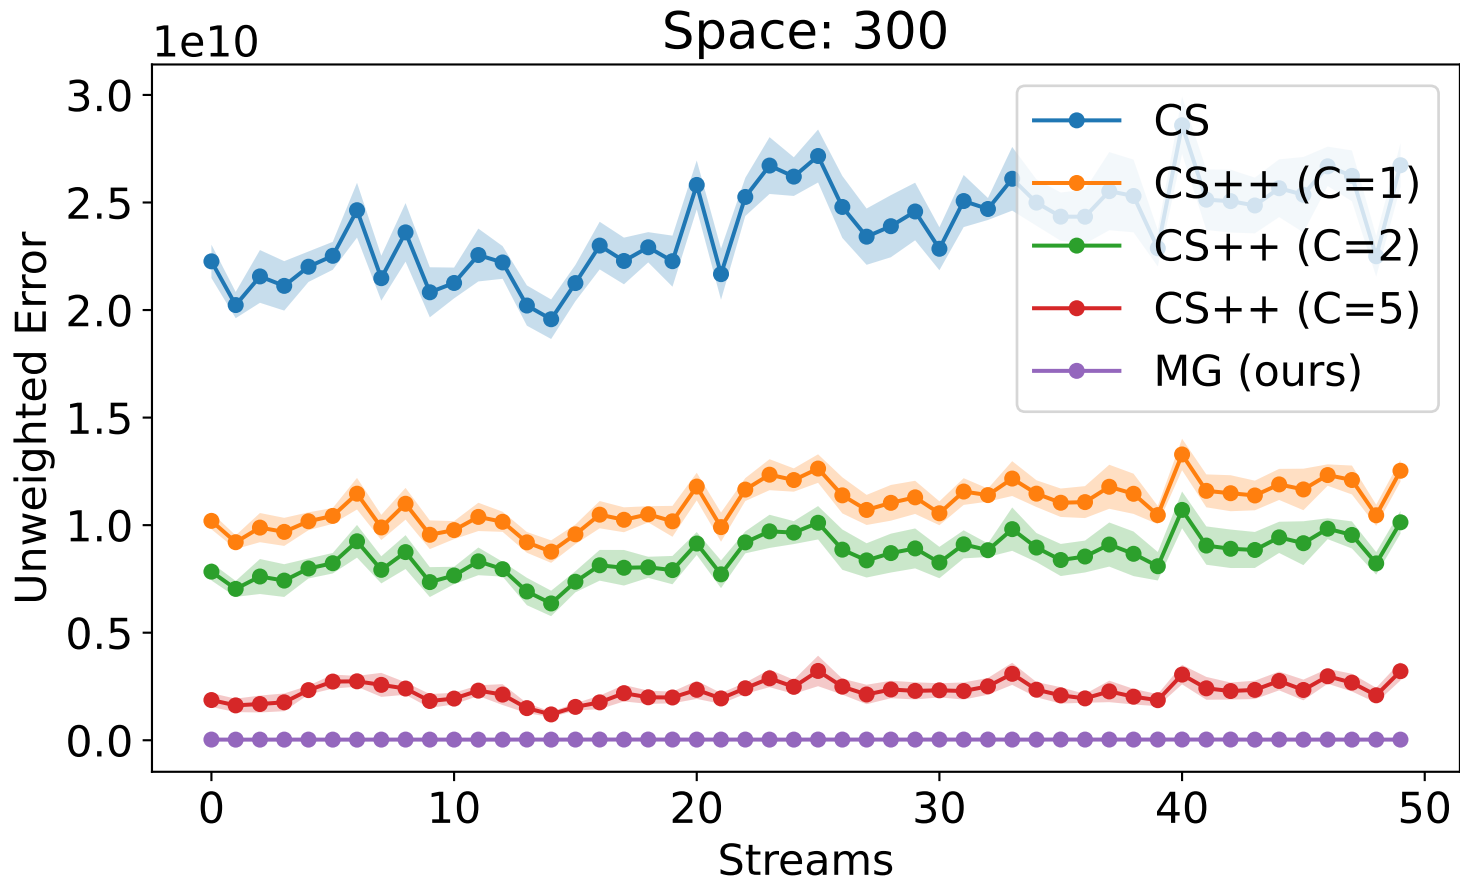

Supplement: supplementary_material [file attachment]

# Error/Space Tradeoff

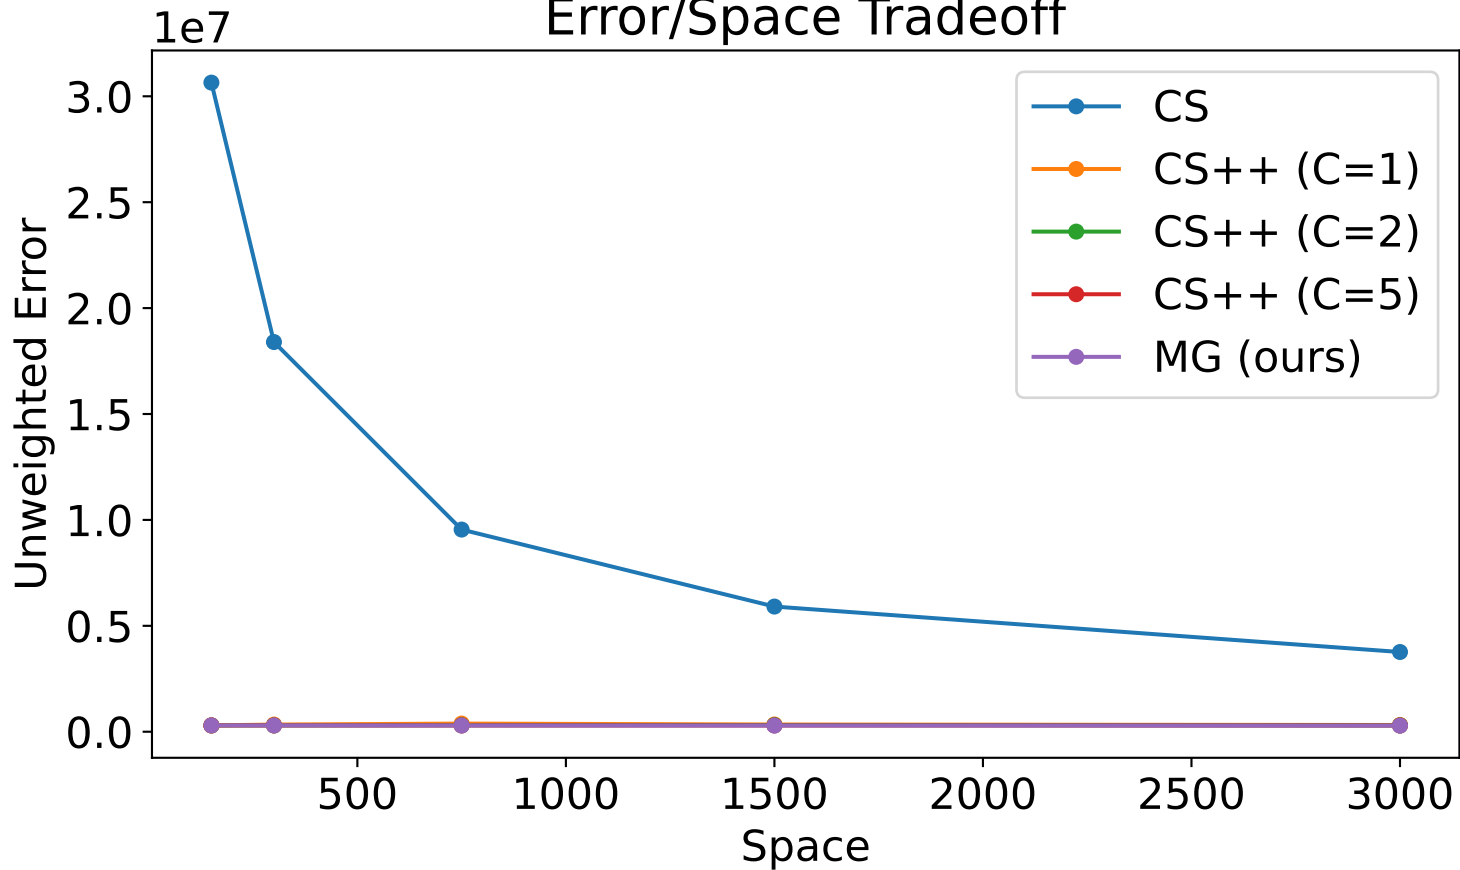

Supplement: supplementary_material [file attachment]

Rank: 40

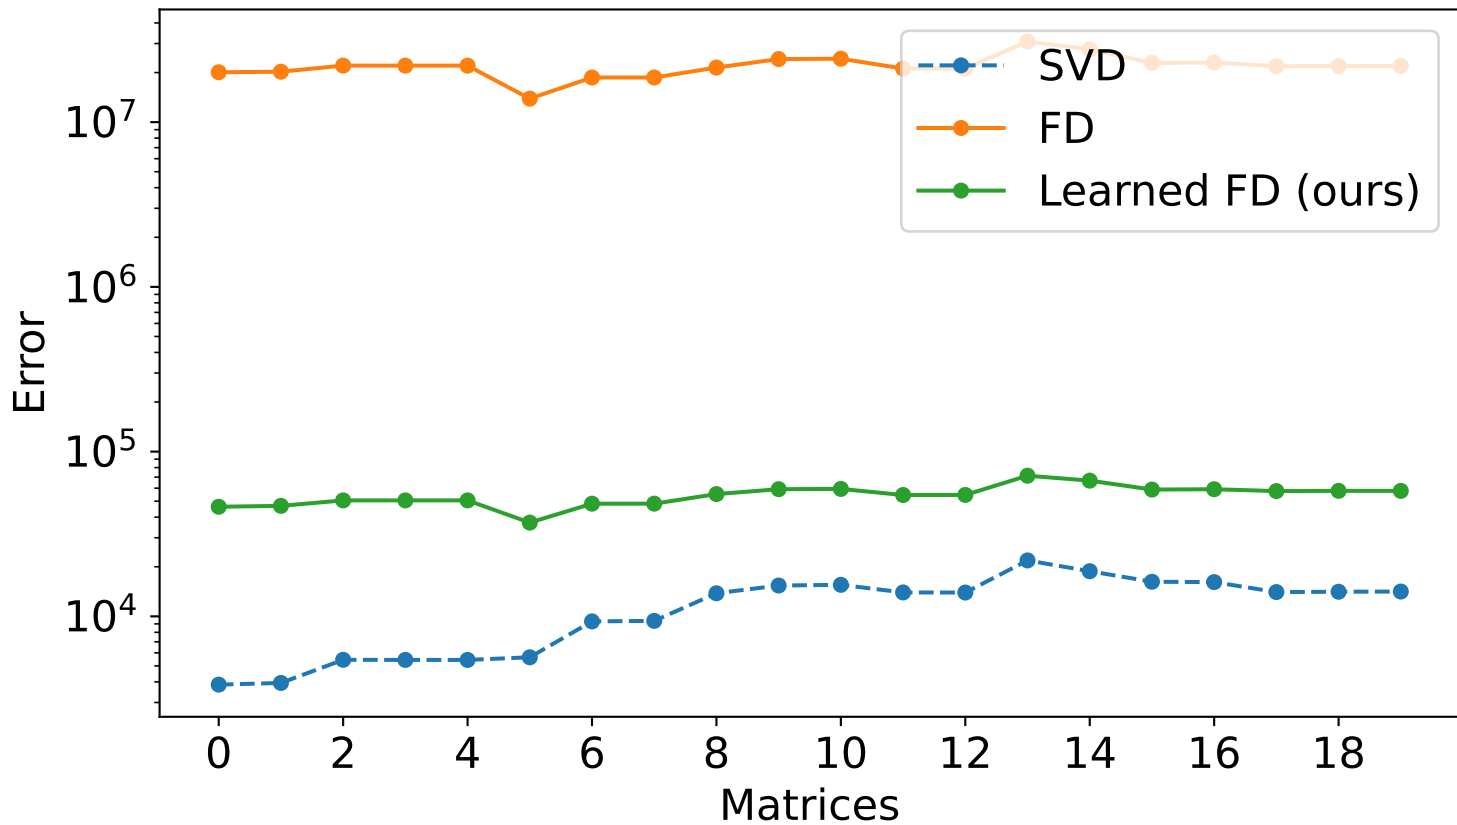

Supplement: supplementary_material [file attachment]

Space: 750

1e7

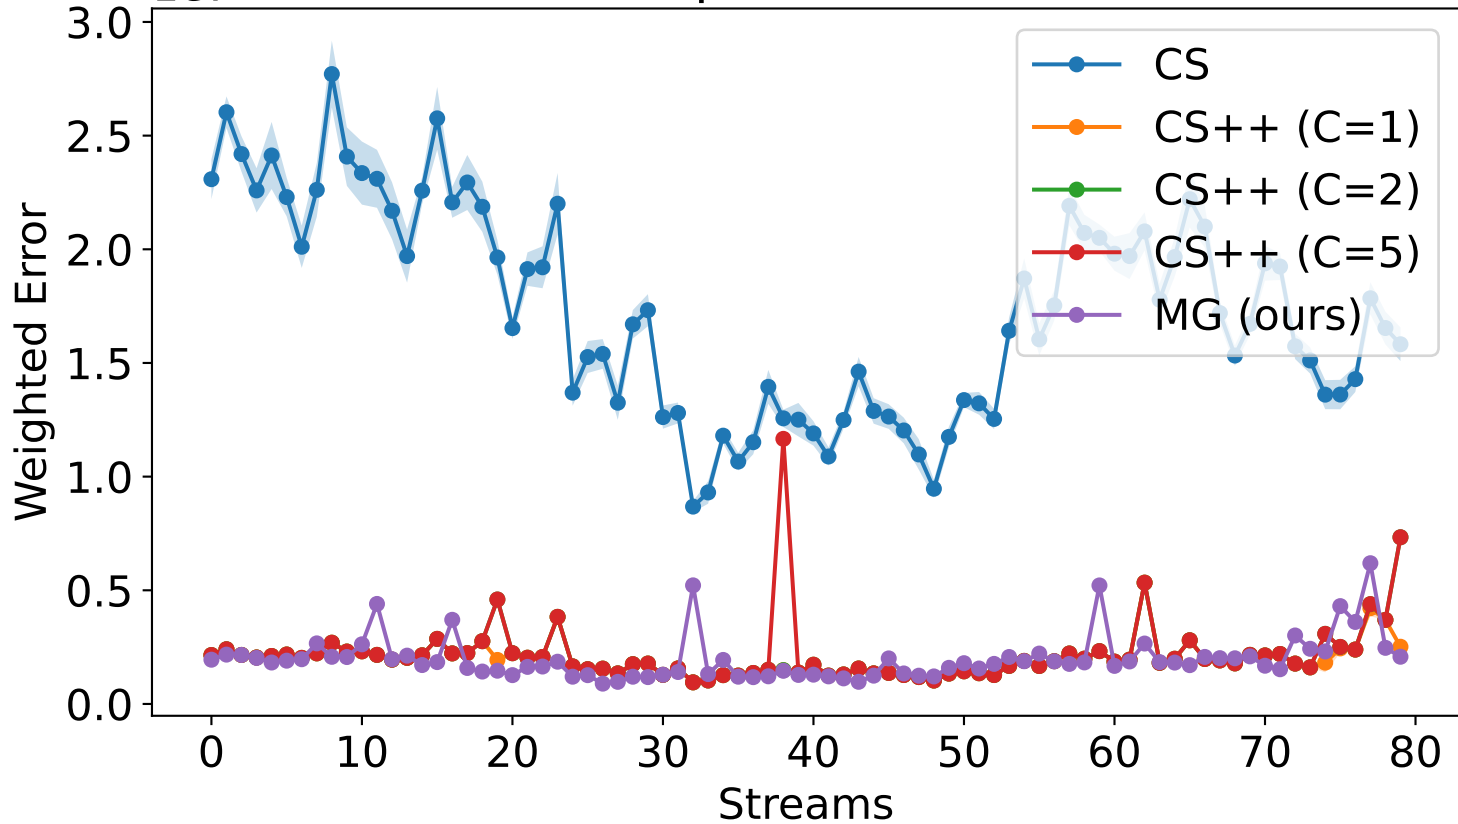

Supplement: supplementary_material [file attachment]

Rank: 180

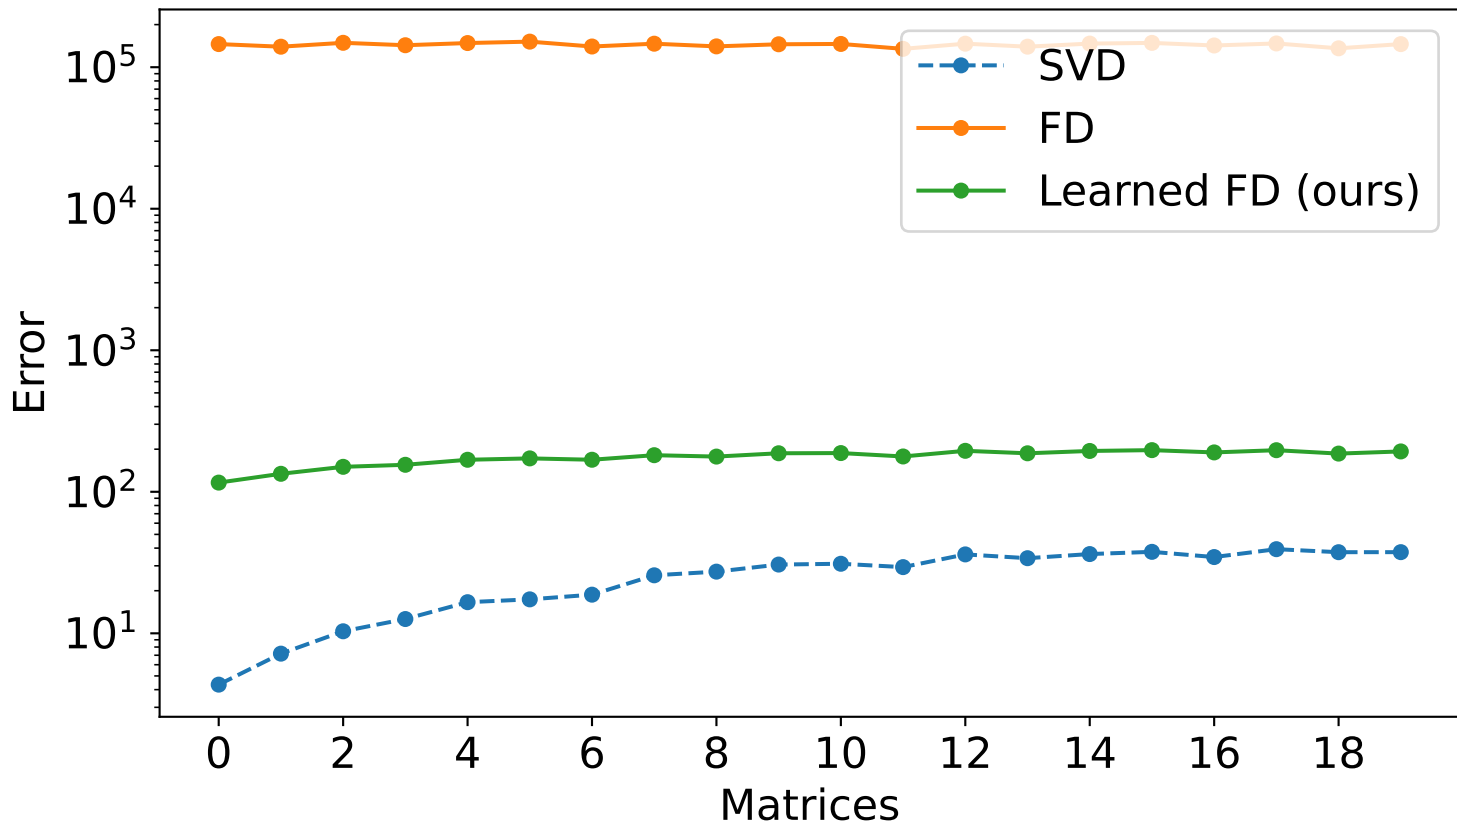

Supplement: supplementary_material [file attachment]

Space: 150

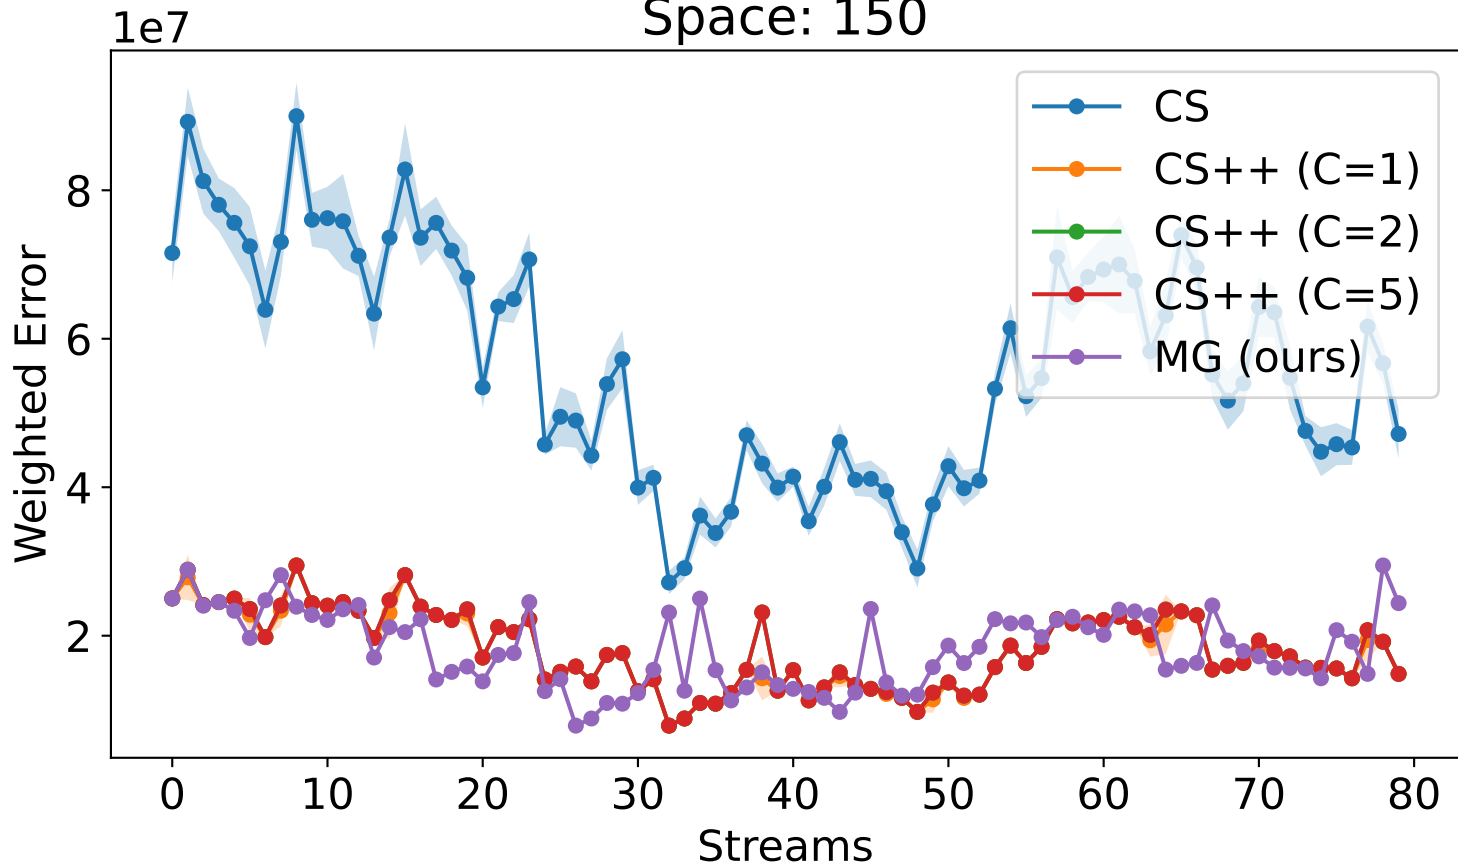

Supplement: supplementary_material [file attachment]

Rank: 20

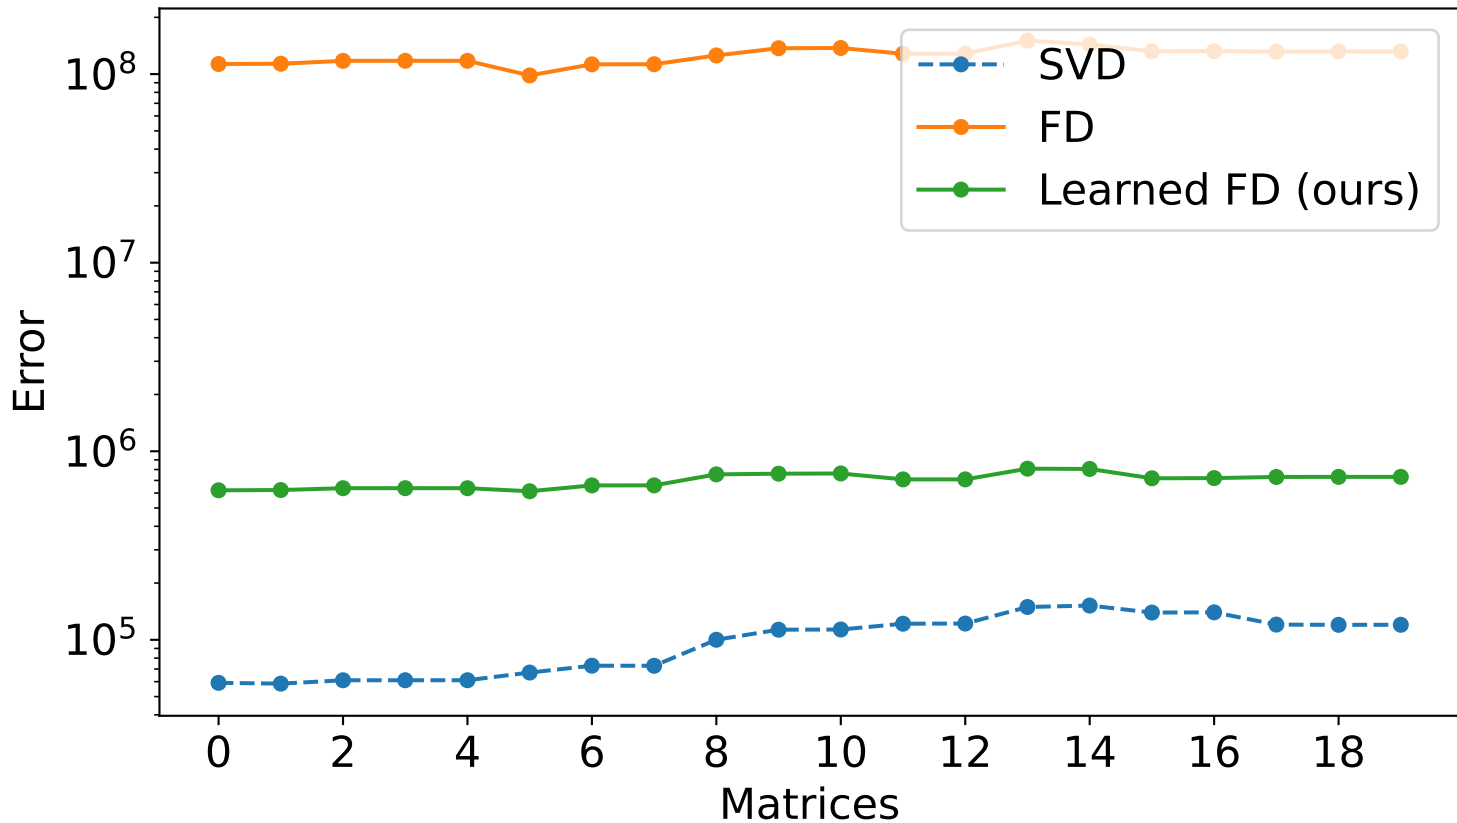

Supplement: supplementary_material [file attachment]

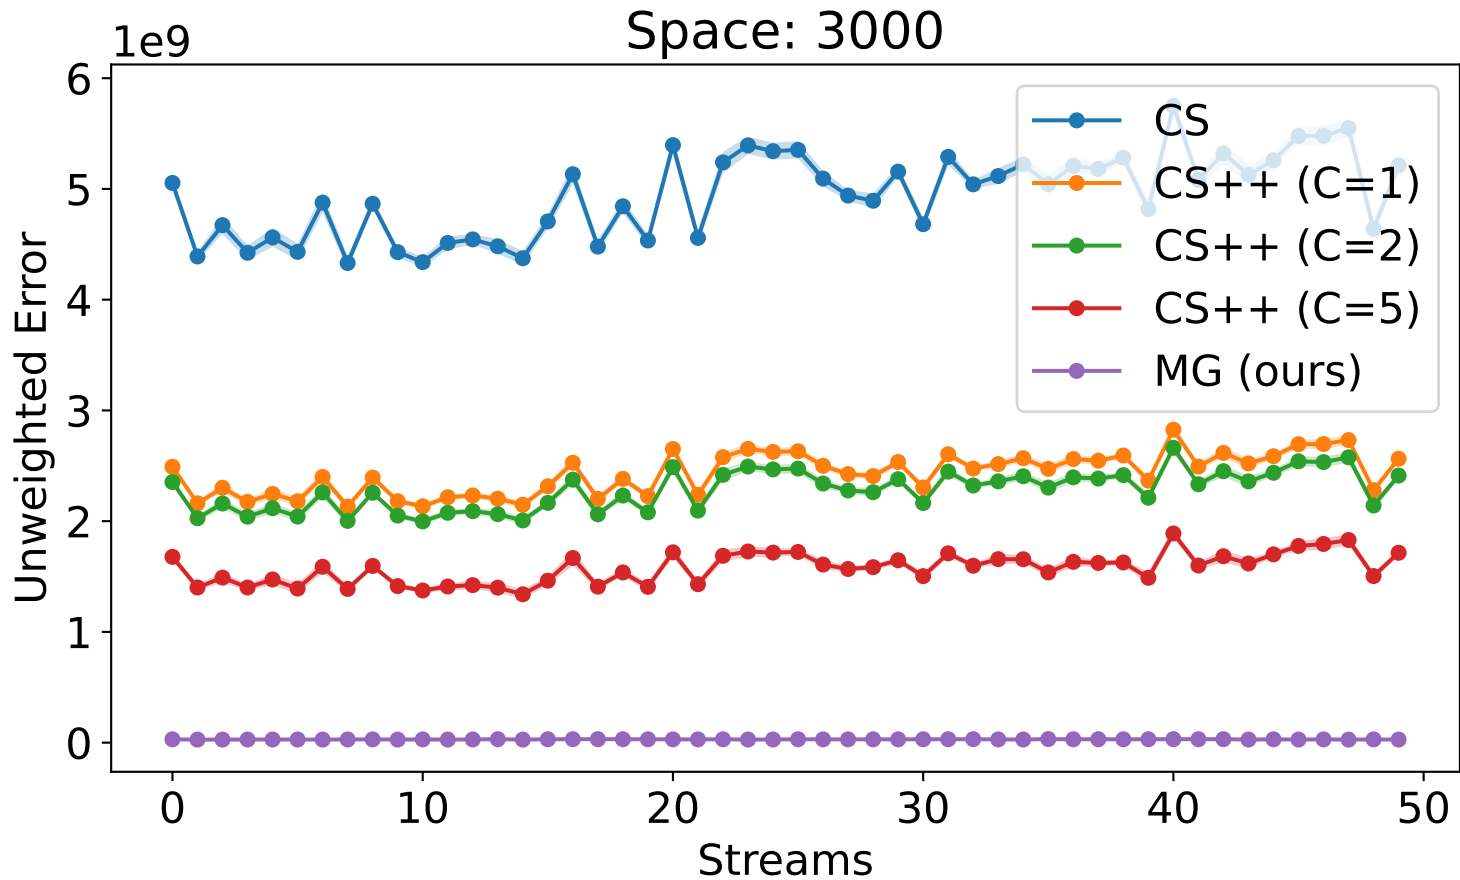

Supplement: supplementary_material [file attachment]

Rank: 140

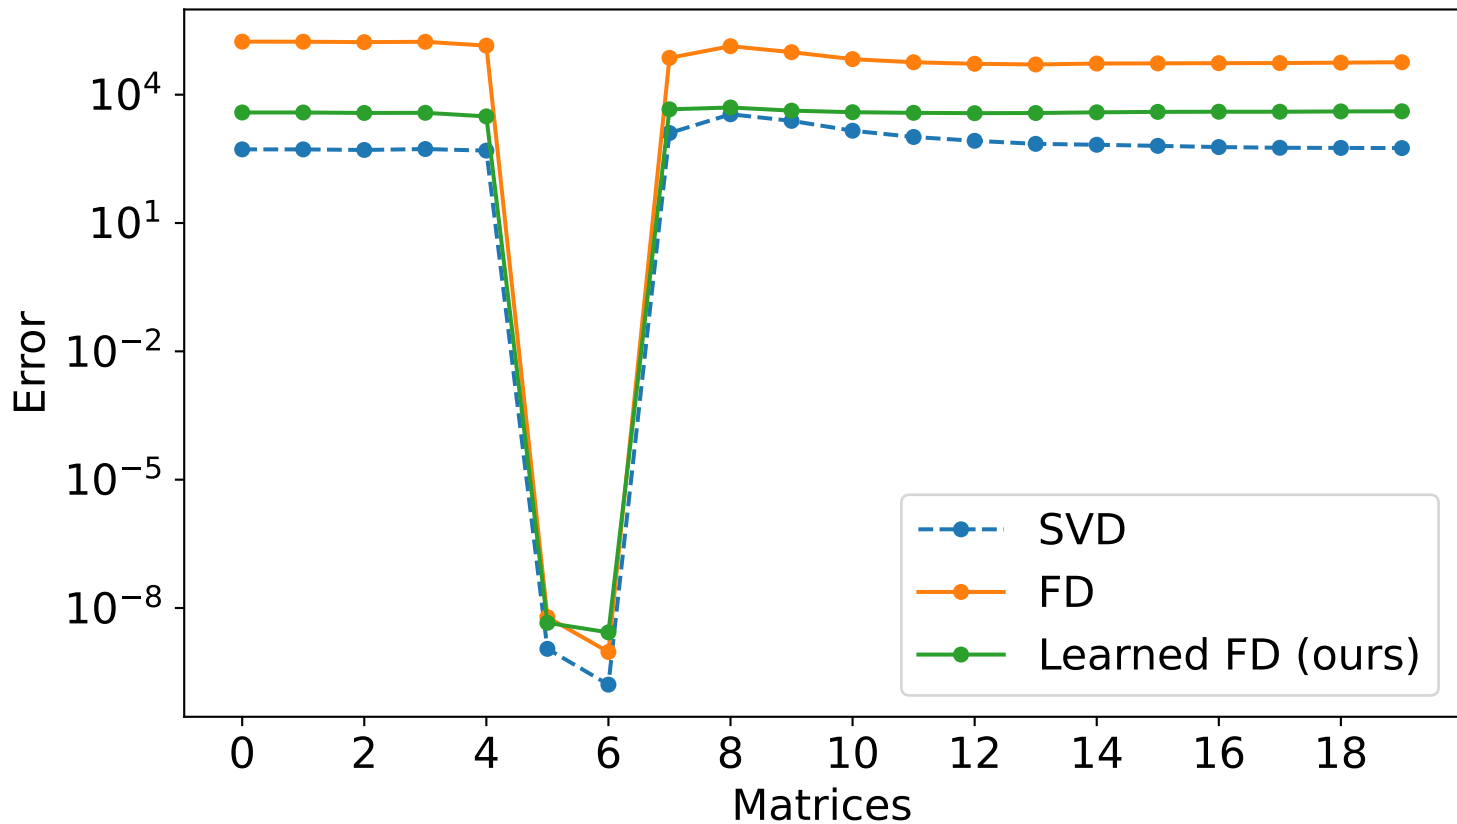

Supplement: supplementary_material [file attachment]

Rank: 140

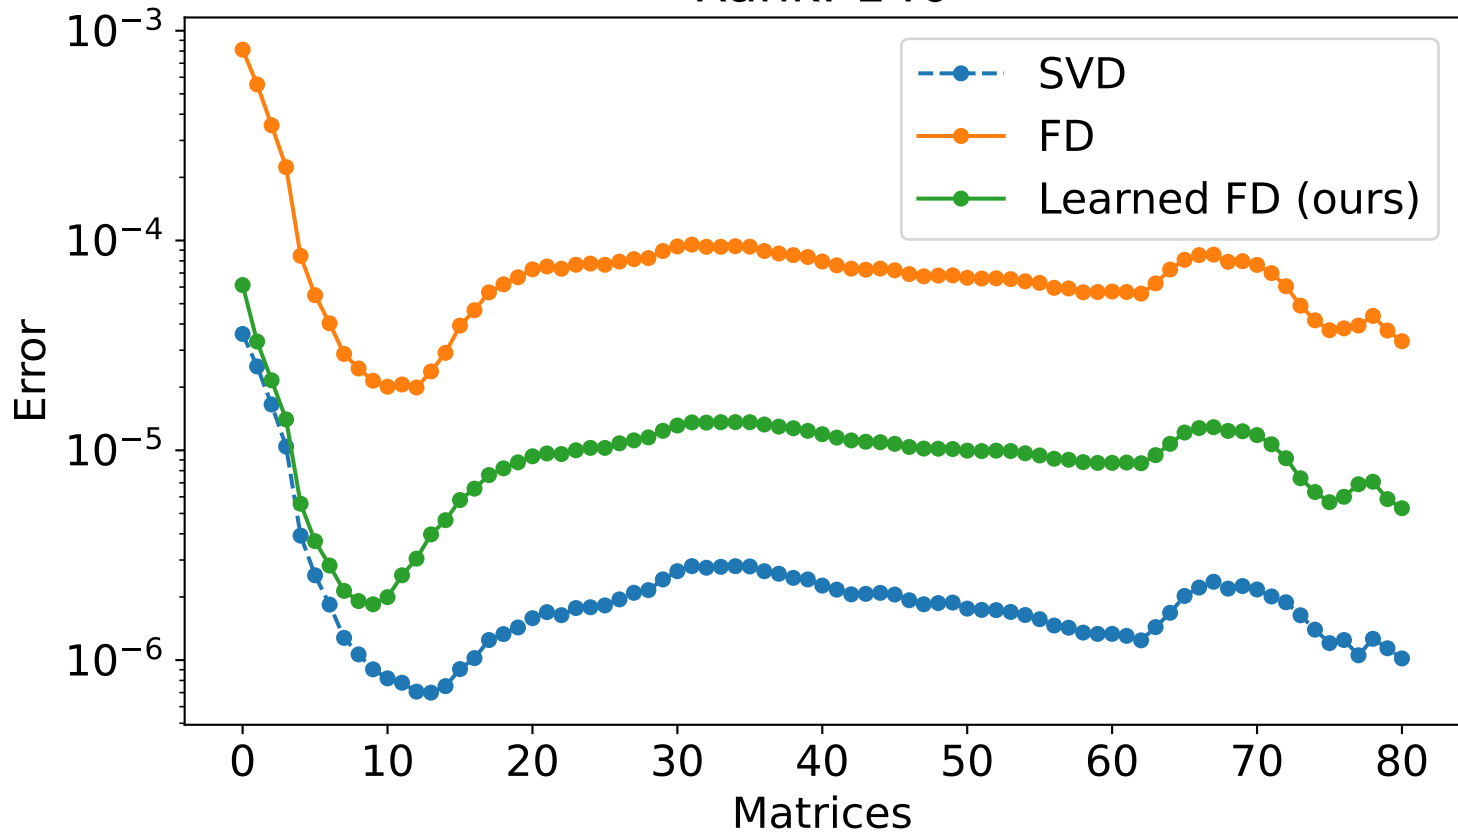

Supplement: supplementary_material [file attachment]

# Error/Rank Tradeoff

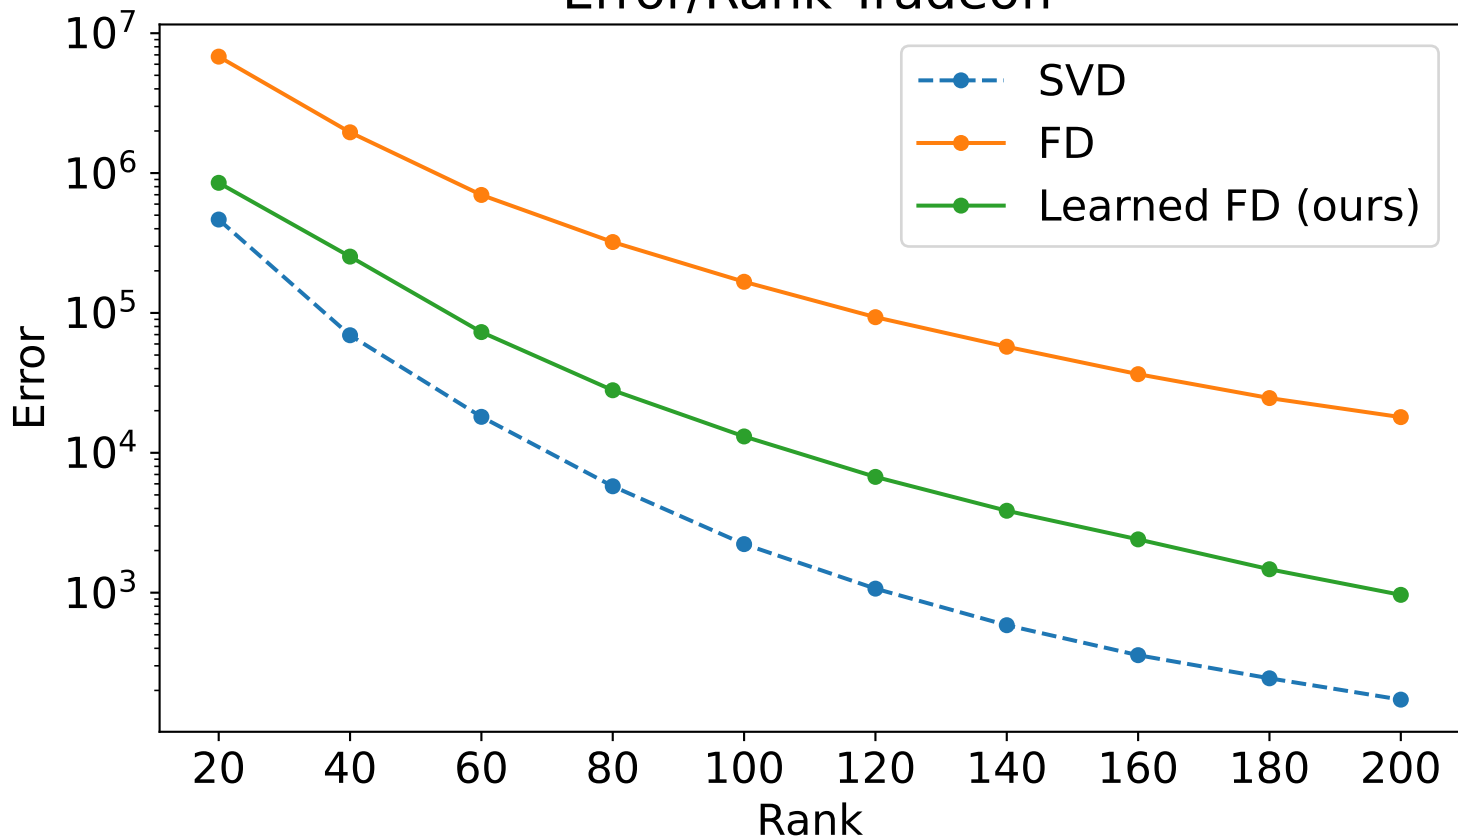

Supplement: supplementary_material [file attachment]

Space: 150

1e12

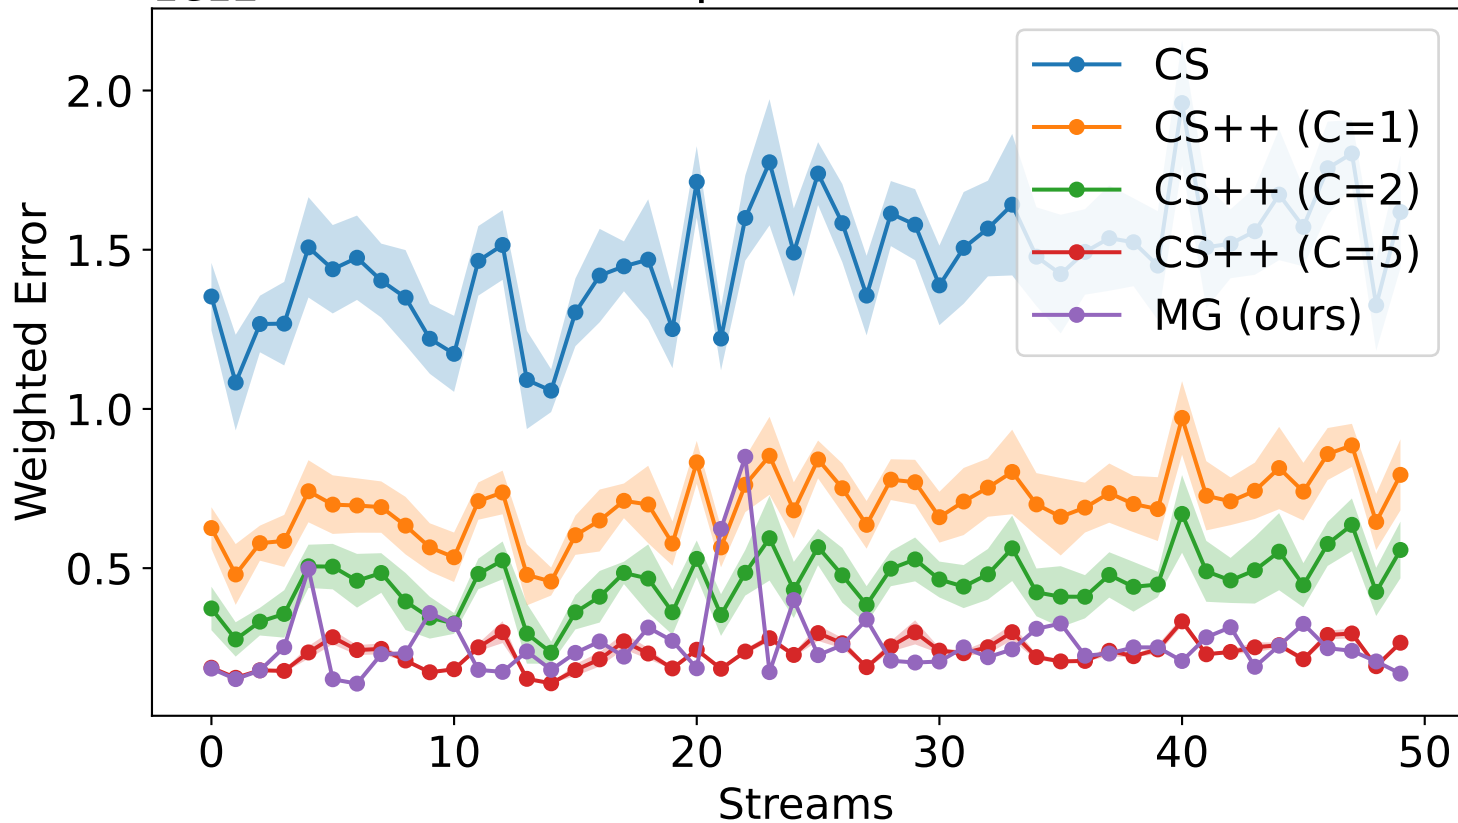

Supplement: supplementary_material [file attachment]

Rank: 160

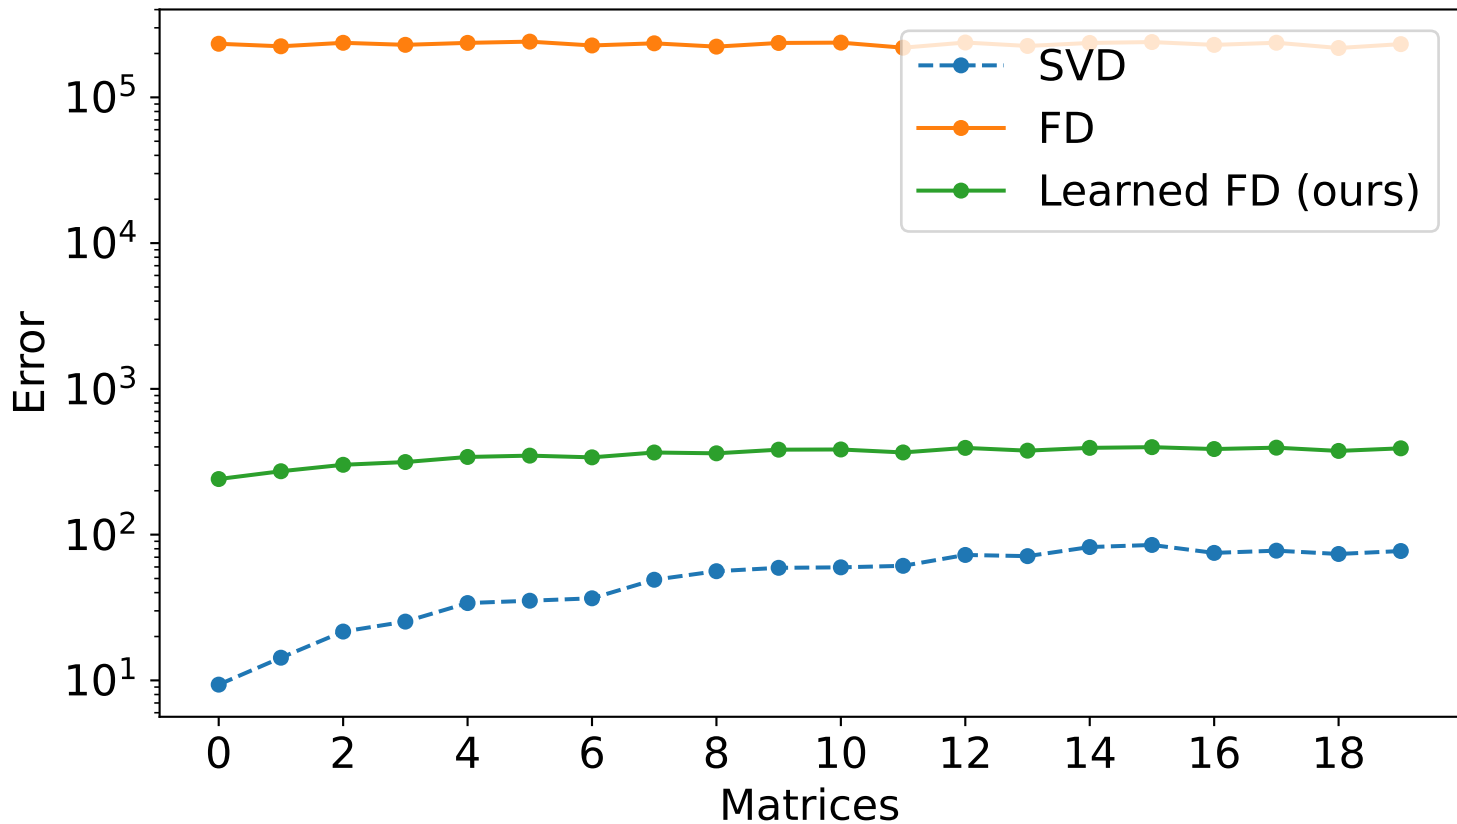

Supplement: supplementary_material [file attachment]

Space: 3000

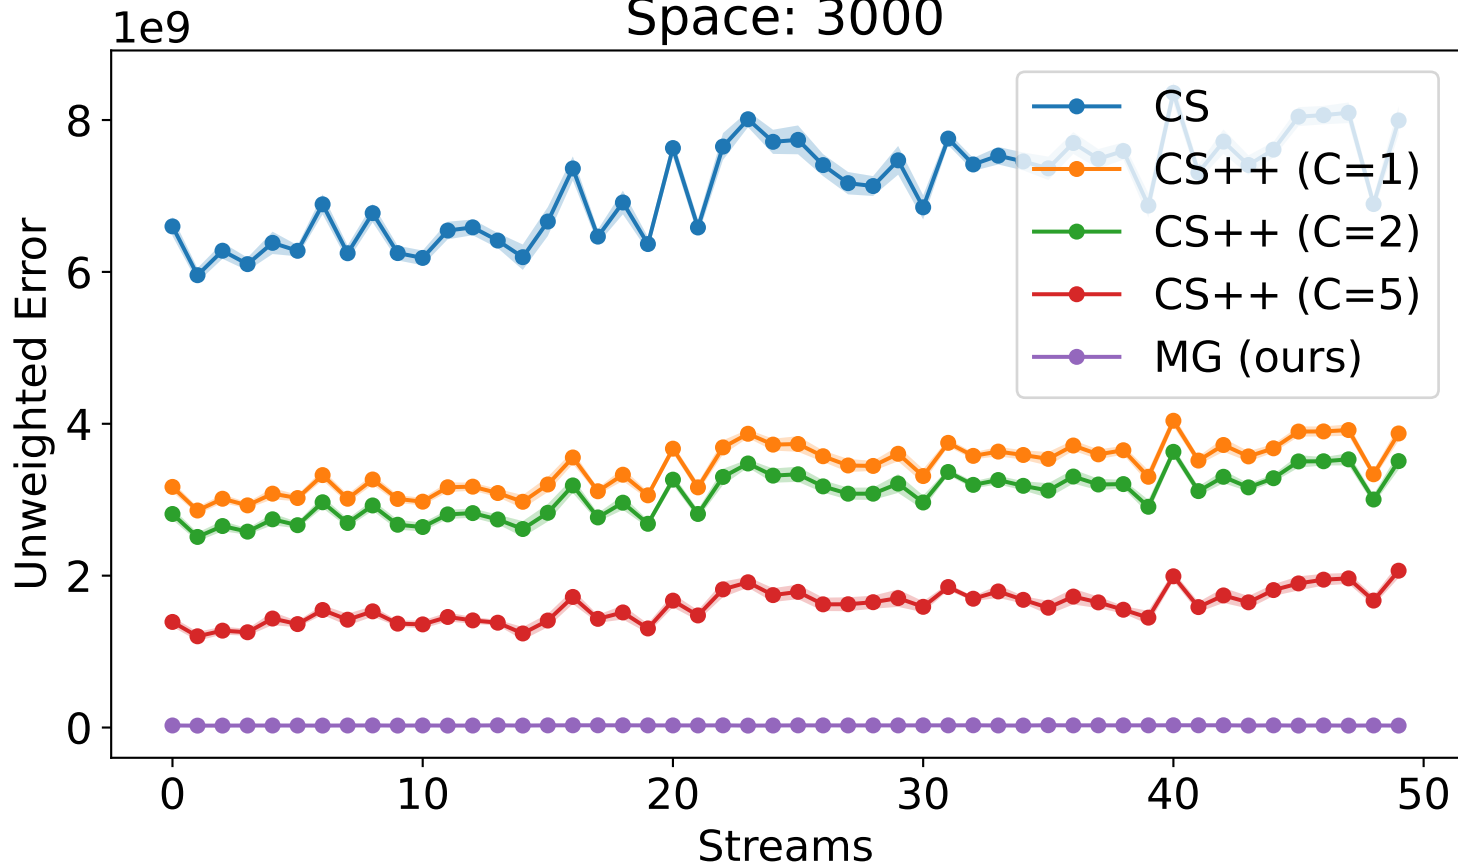

Supplement: supplementary_material [file attachment]

Rank: 200

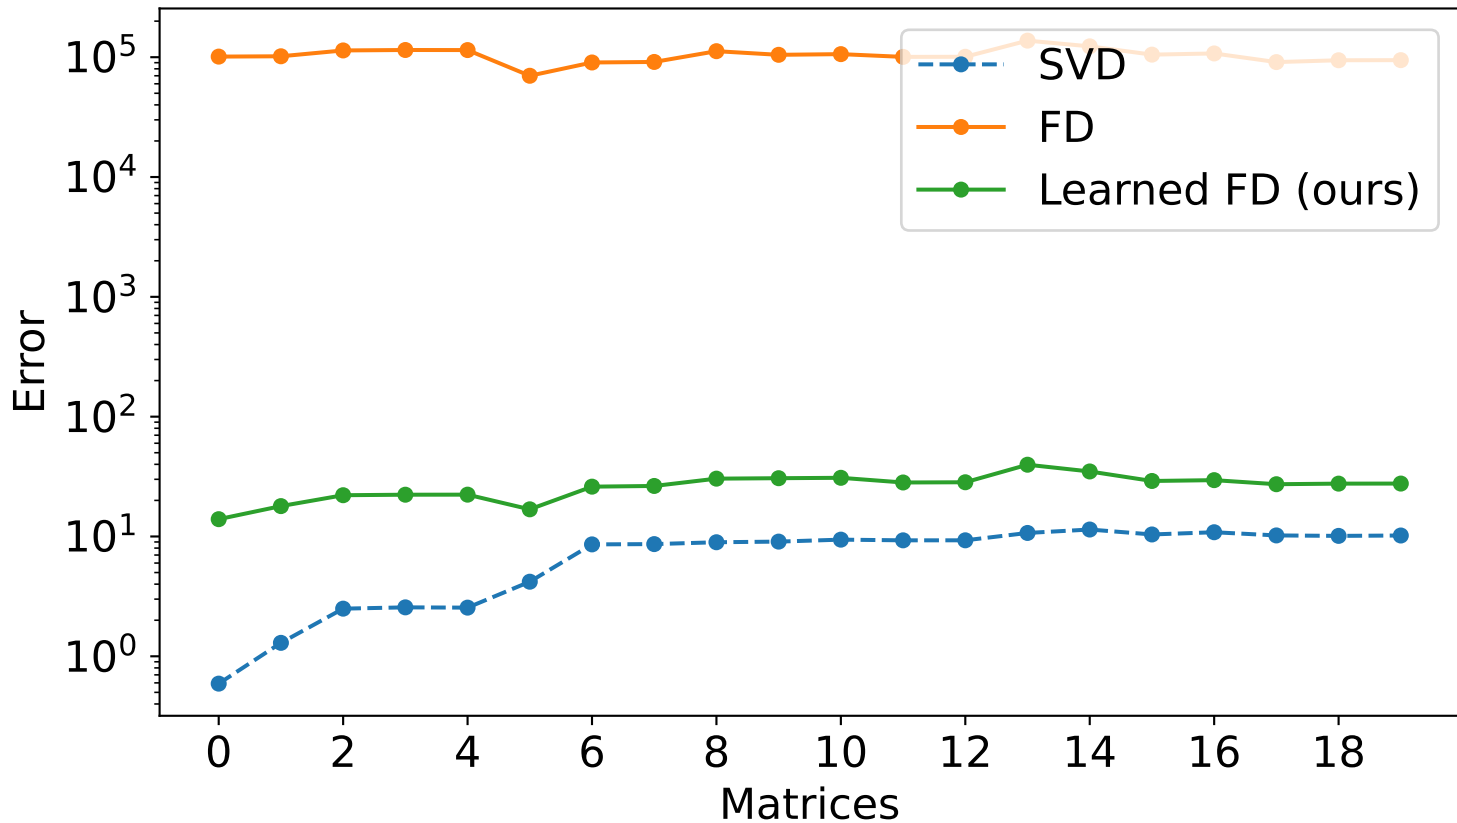

Supplement: supplementary_material [file attachment]

Rank: 200

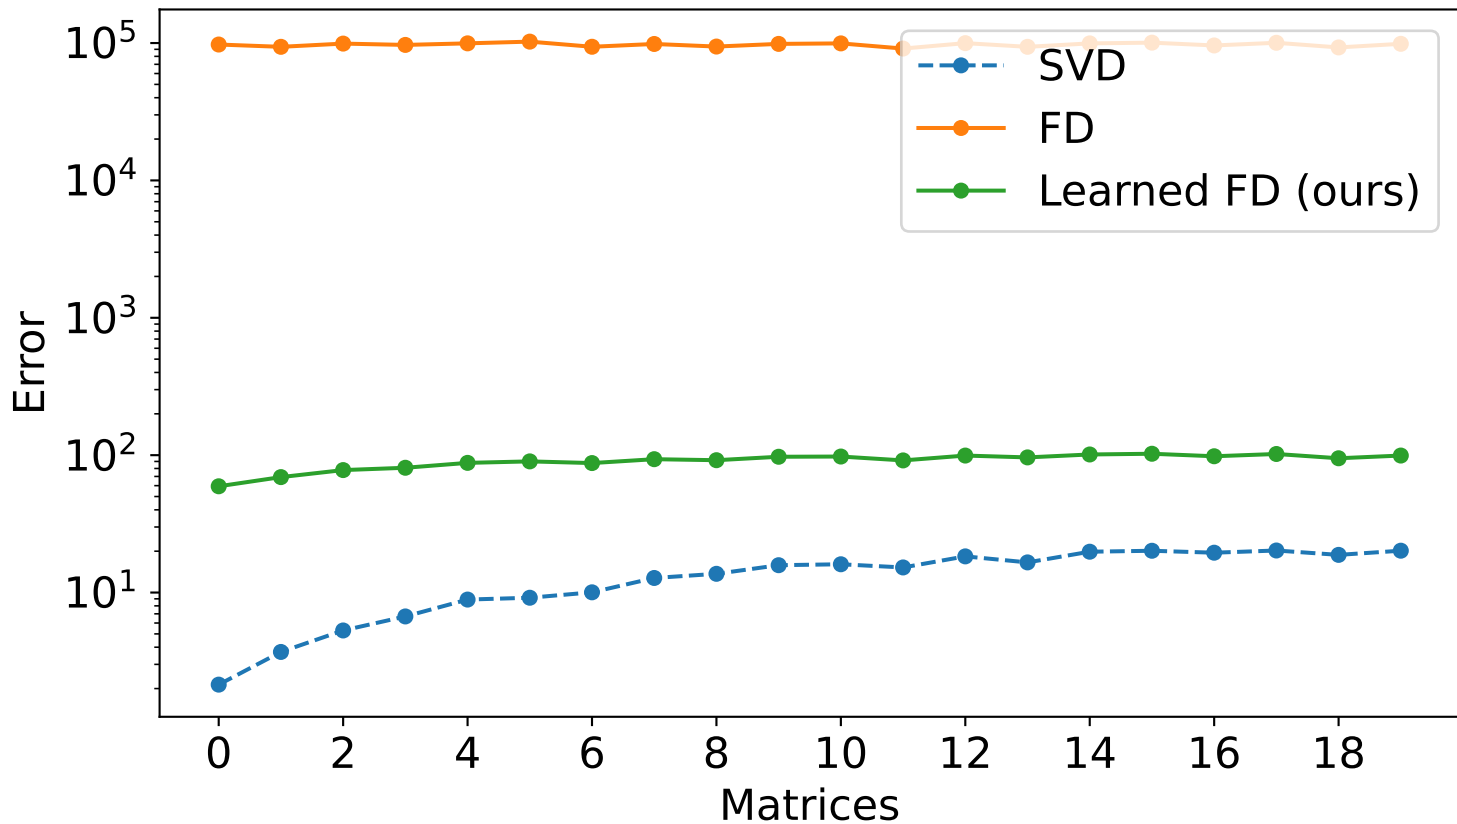

Supplement: supplementary_material [file attachment]

# Error/Space Tradeoff

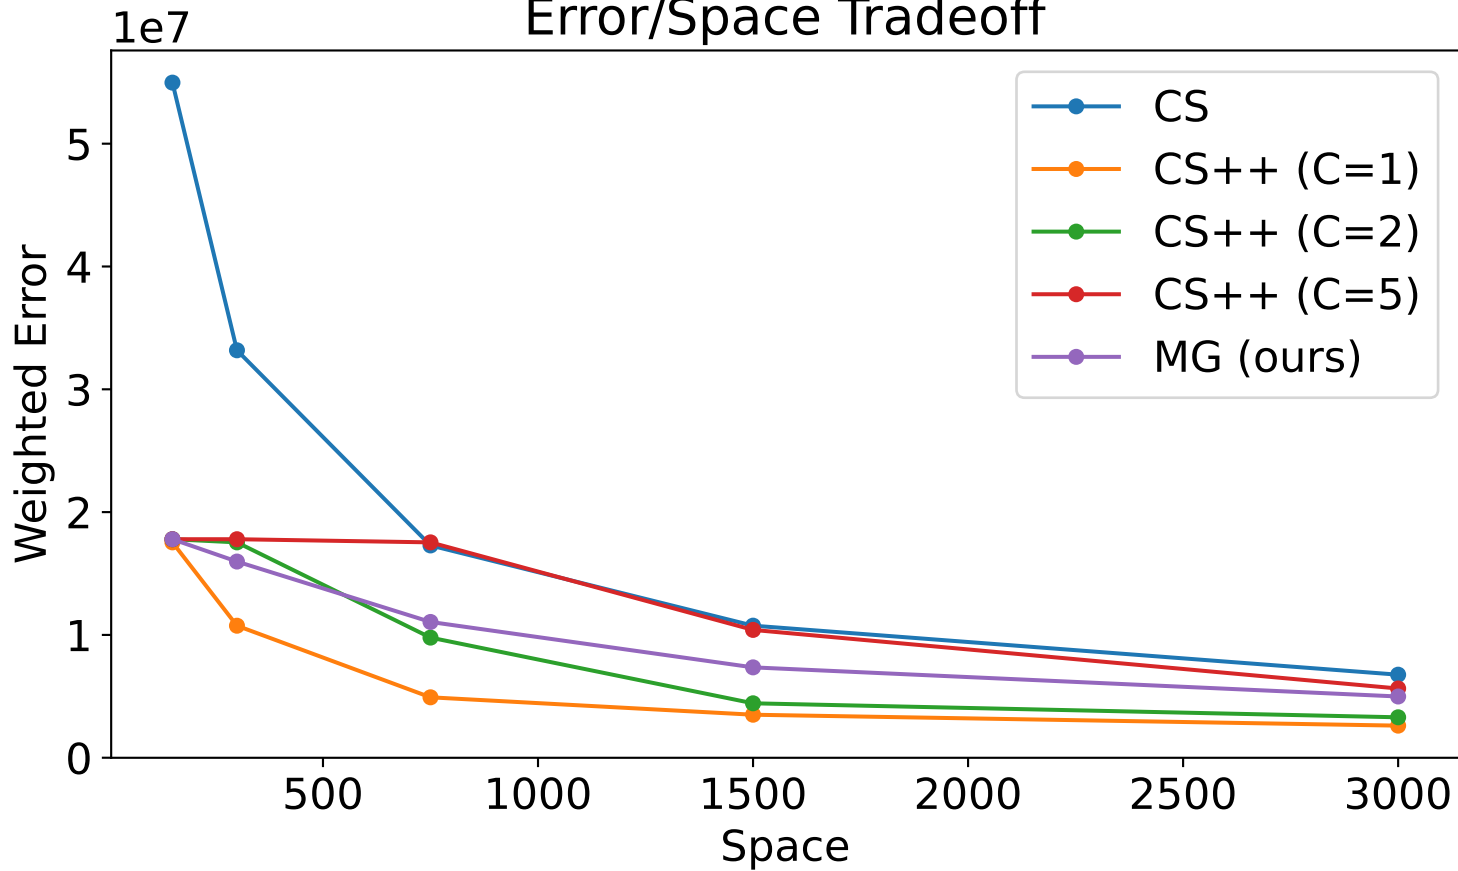

Supplement: supplementary_material [file attachment]

# Eagle Log-Log Singular Values

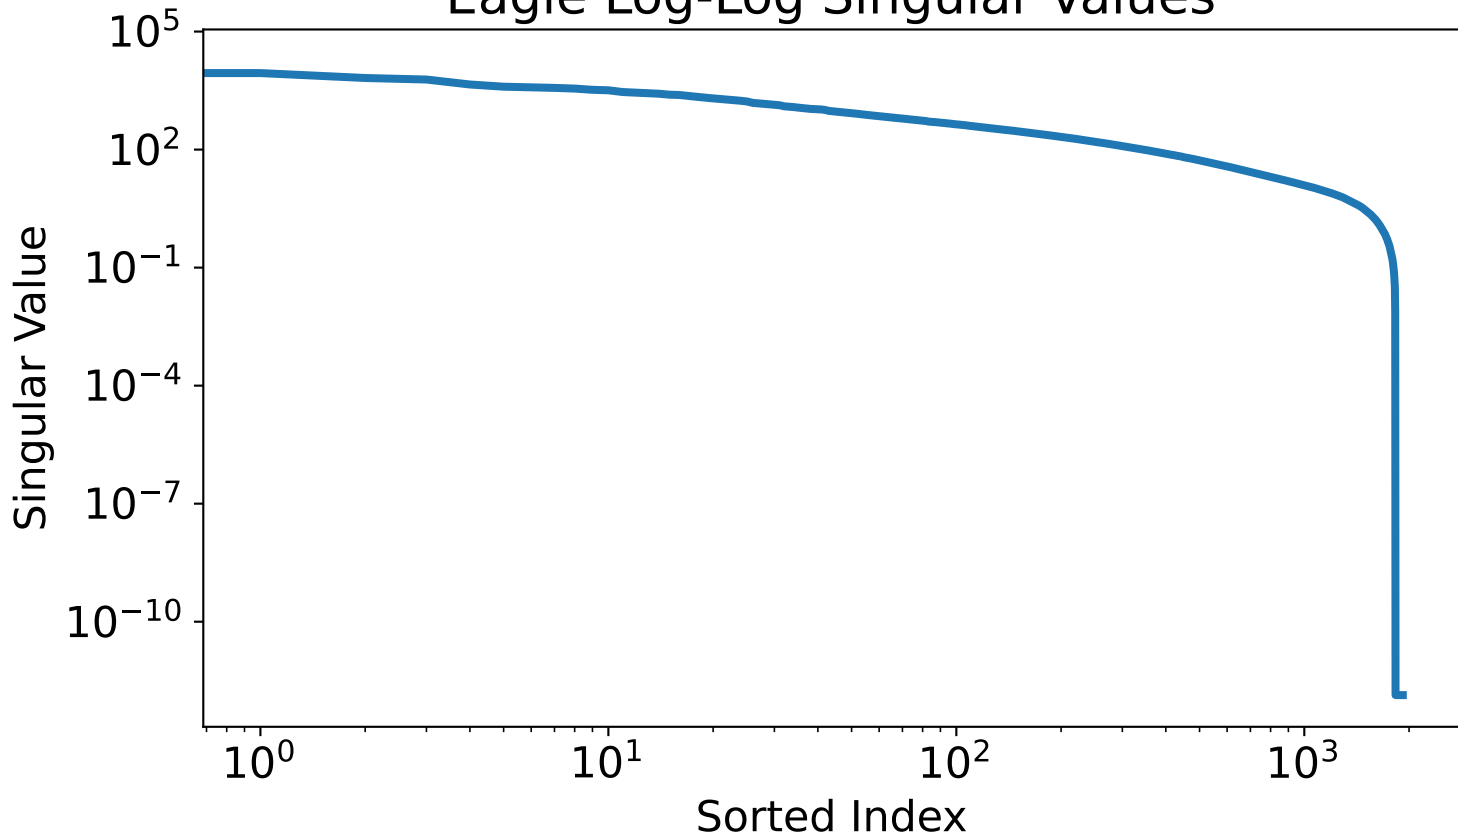

Supplement: supplementary_material [file attachment]

Rank: 180

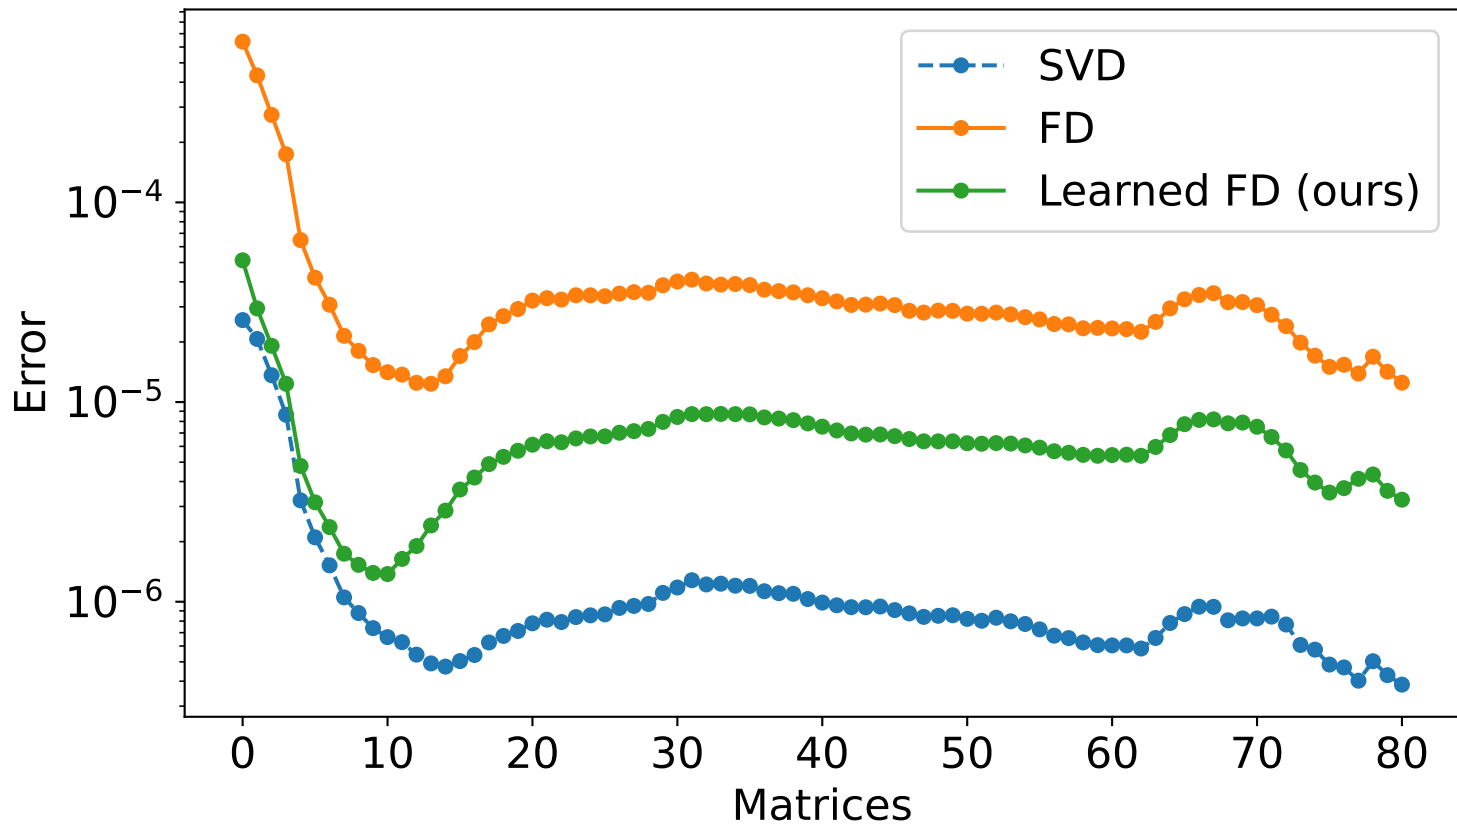

Supplement: supplementary_material [file attachment]

Rank: 100

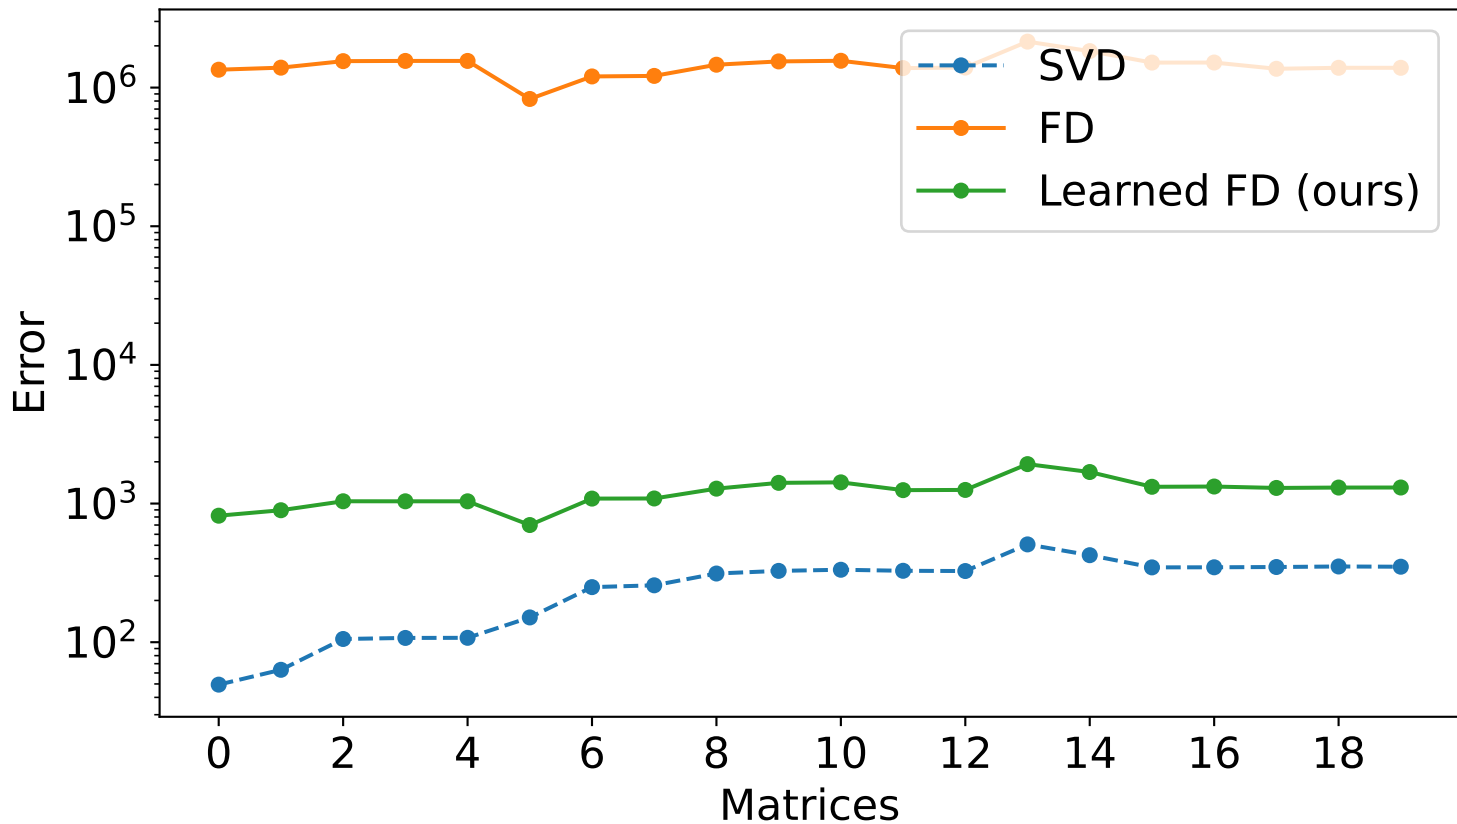

Supplement: supplementary_material [file attachment]

Rank: 200

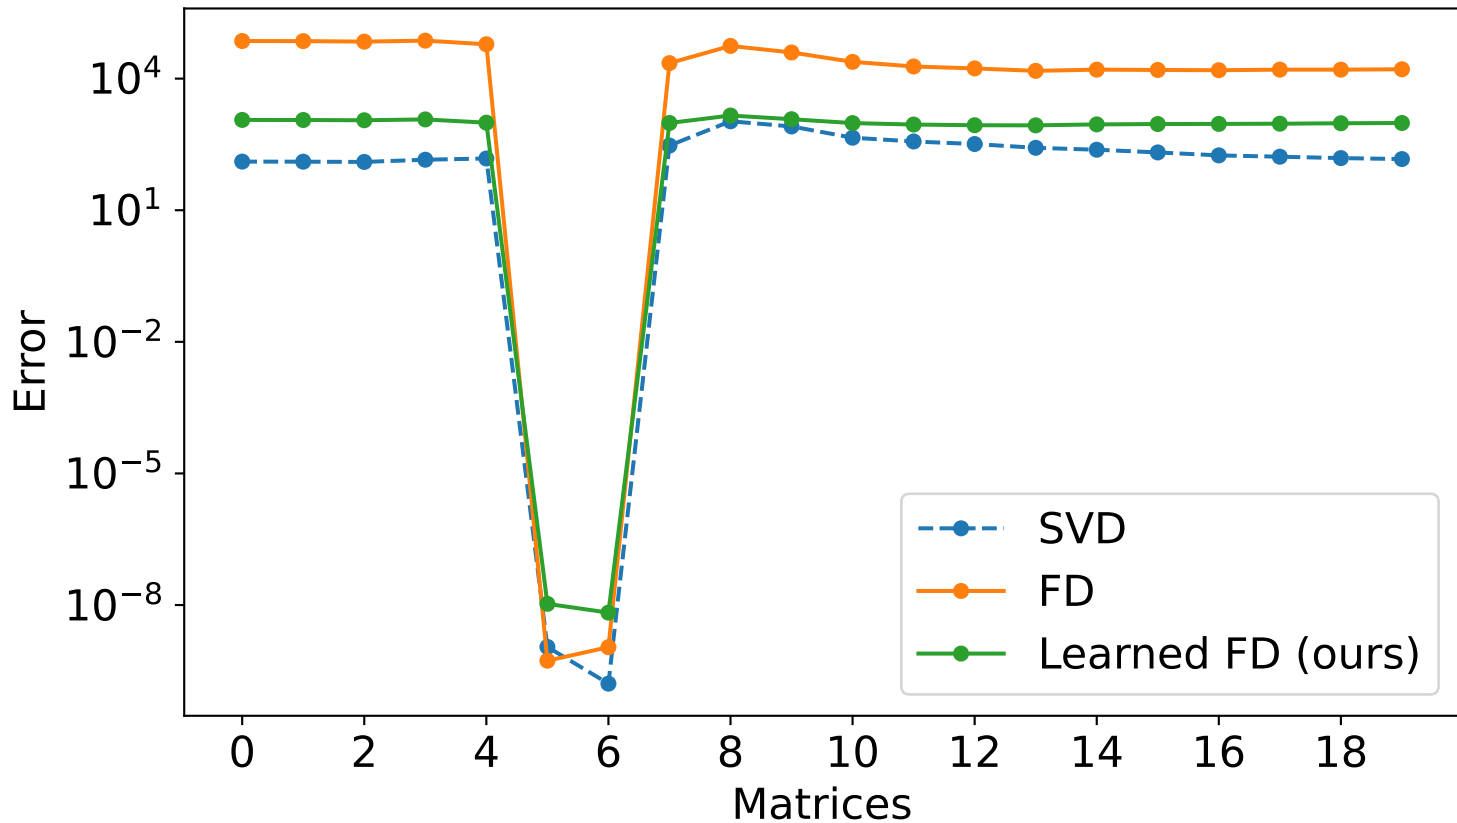

Supplement: supplementary_material [file attachment]

Space: 750

1e7

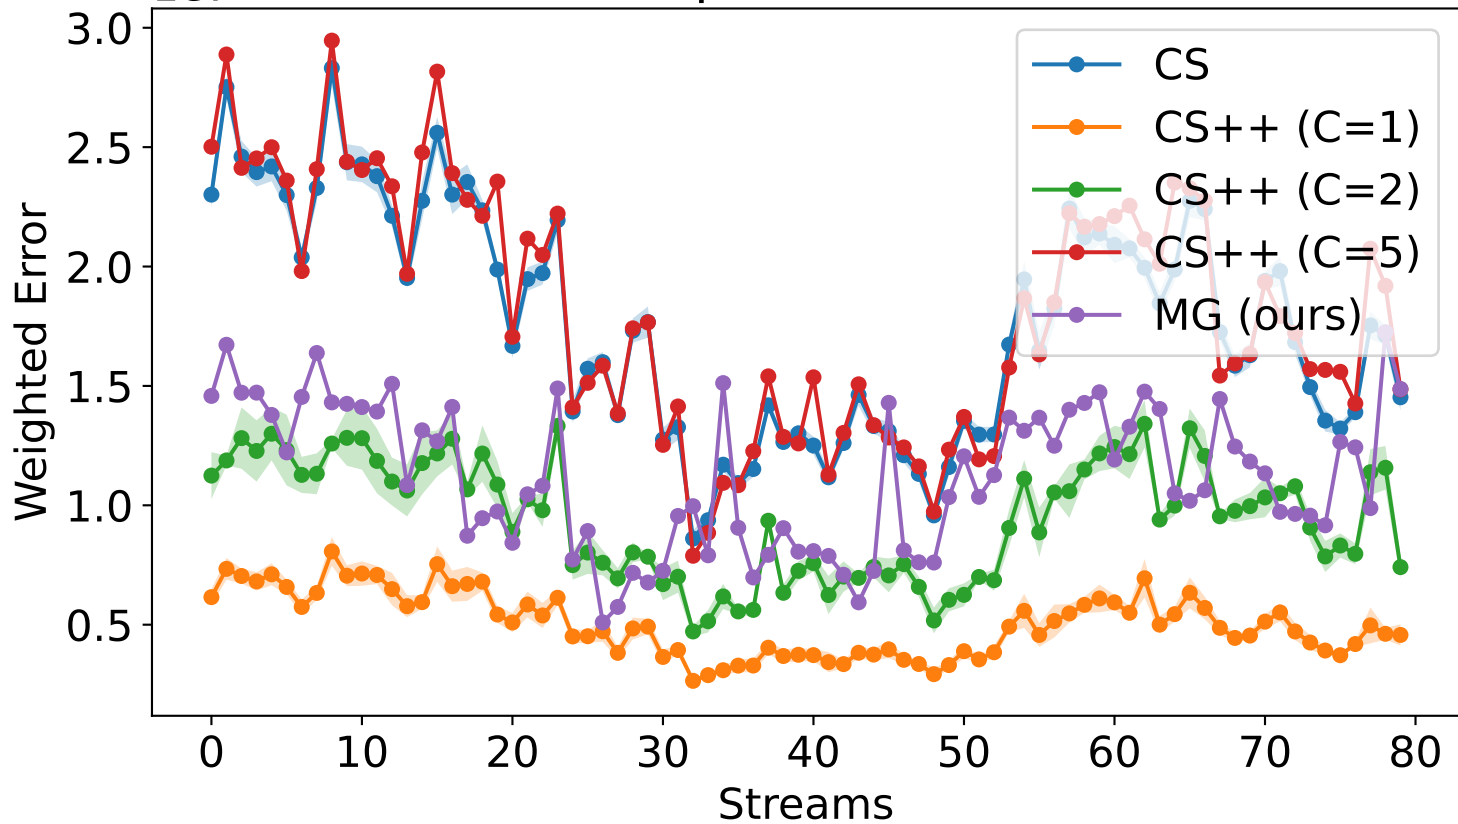

Supplement: supplementary_material [file attachment]

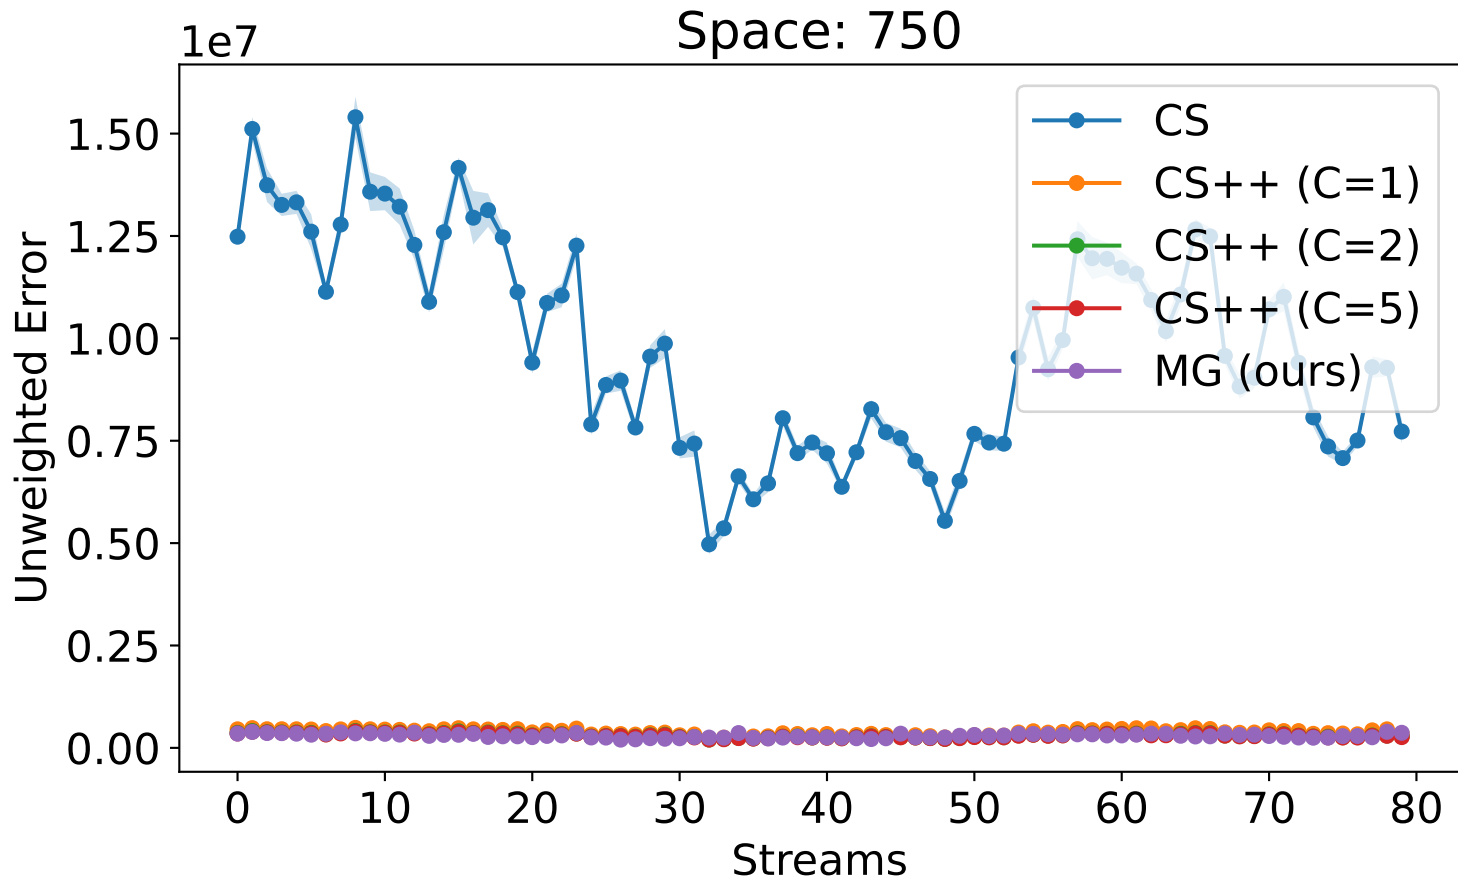

Supplement: supplementary_material [file attachment]

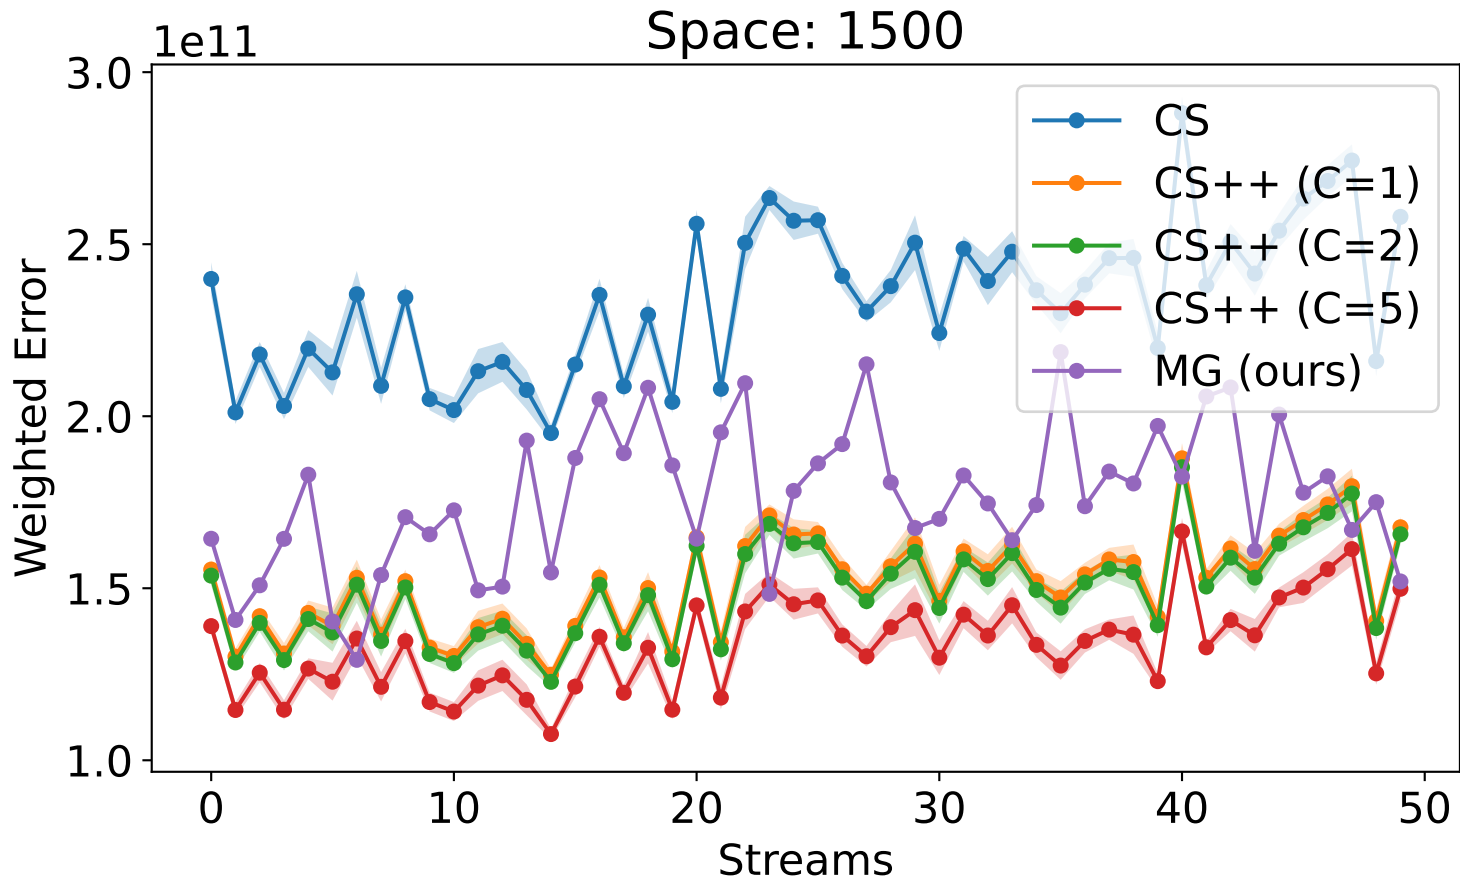

Supplement: supplementary_material [file attachment]

Rank: 180

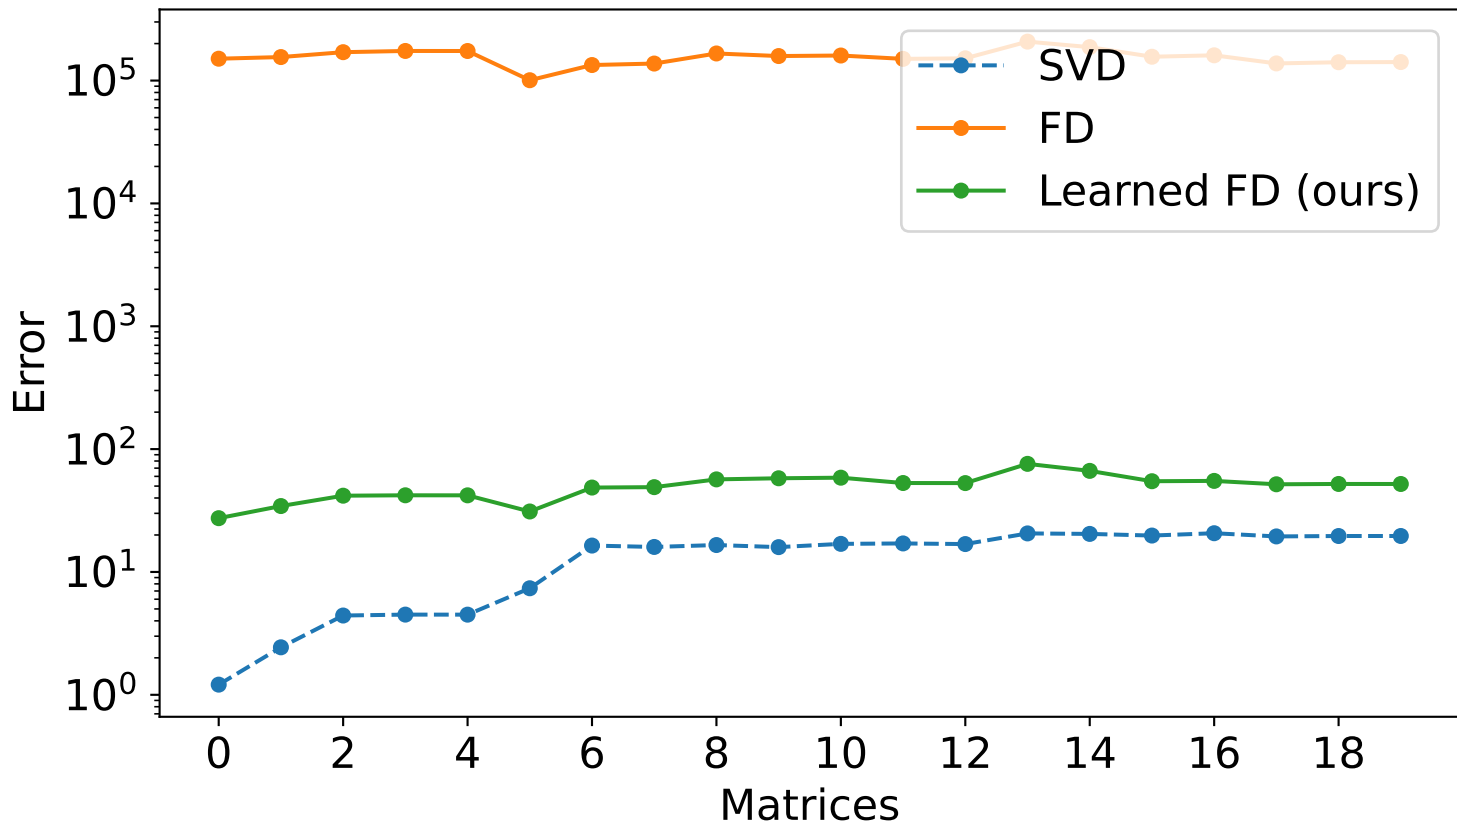

Supplement: supplementary_material [file attachment]

Space: 150

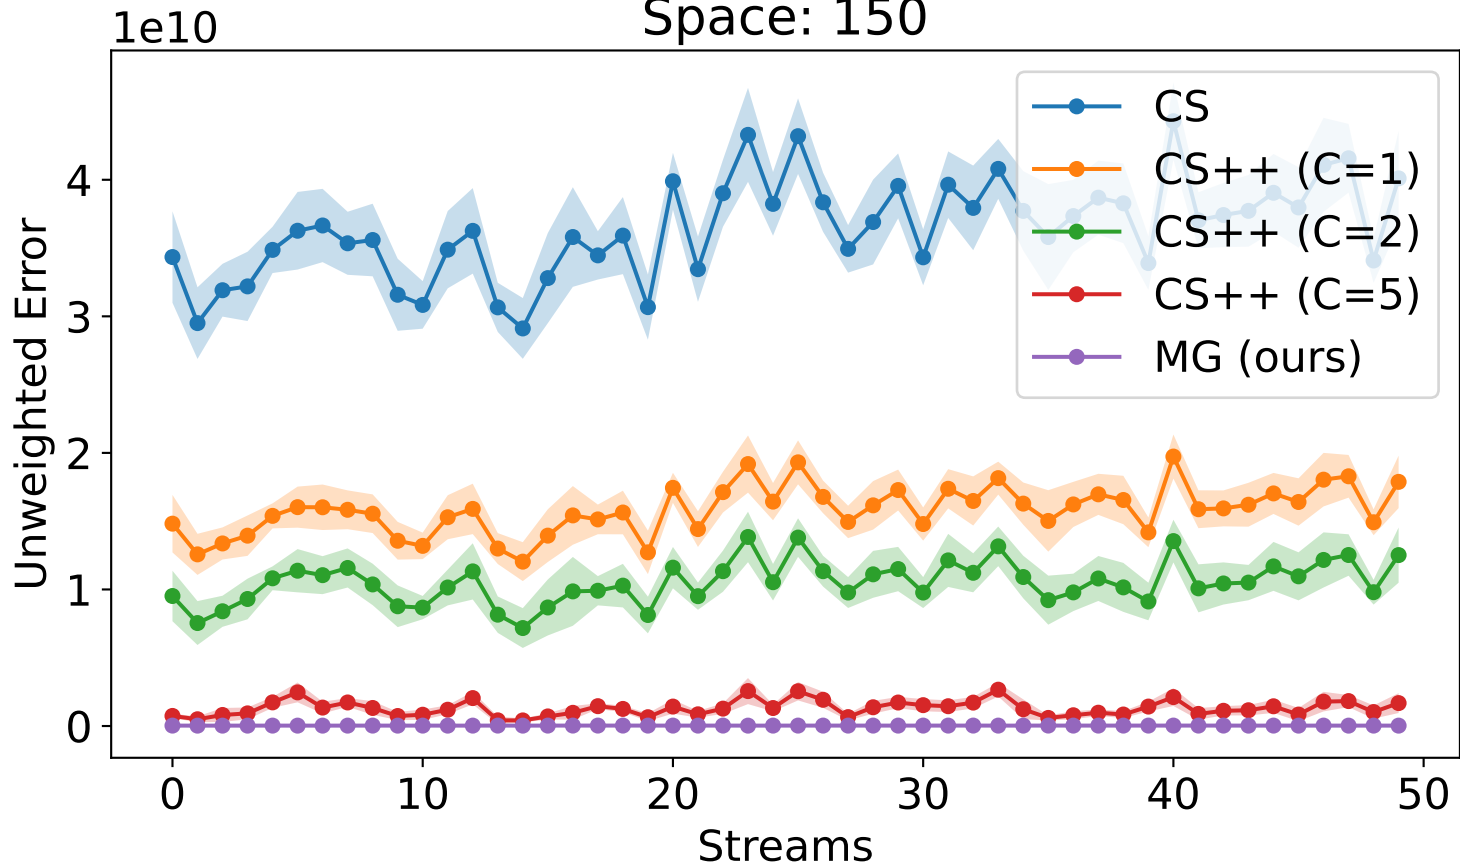

Supplement: supplementary_material [file attachment]

Rank: 160

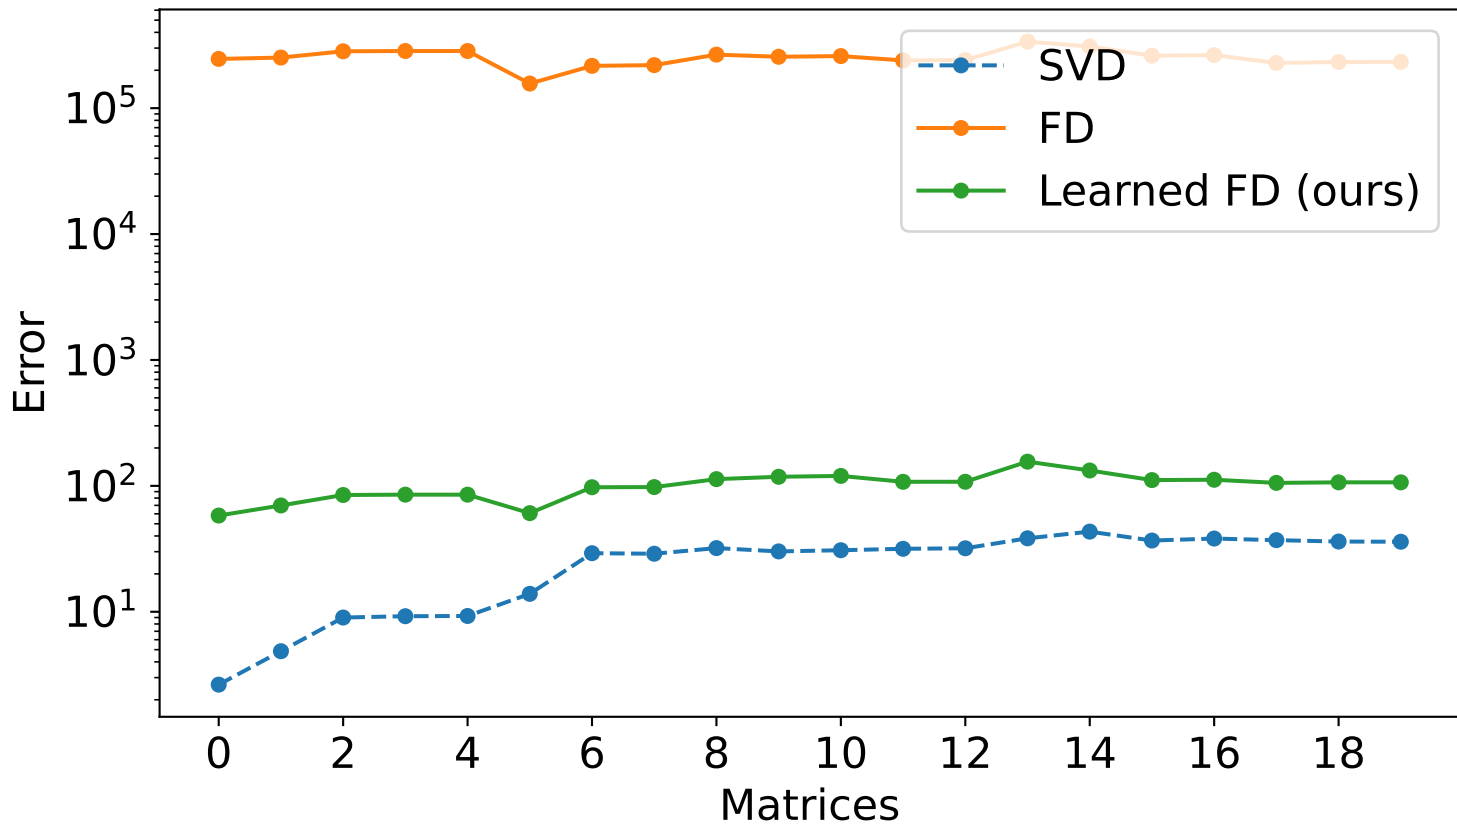

Supplement: supplementary_material [file attachment]

Space: 150

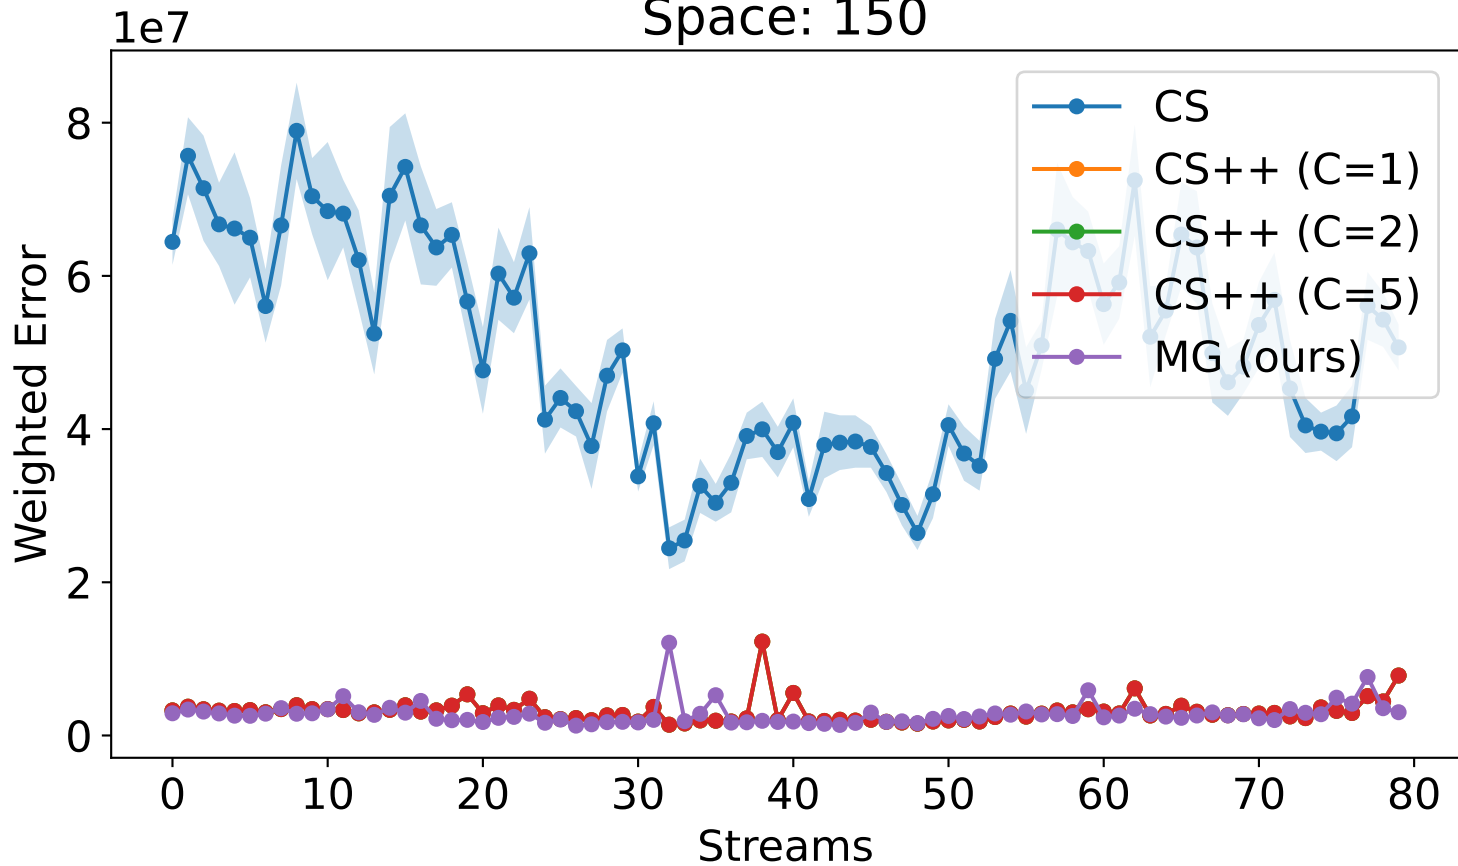

Supplement: supplementary_material [file attachment]

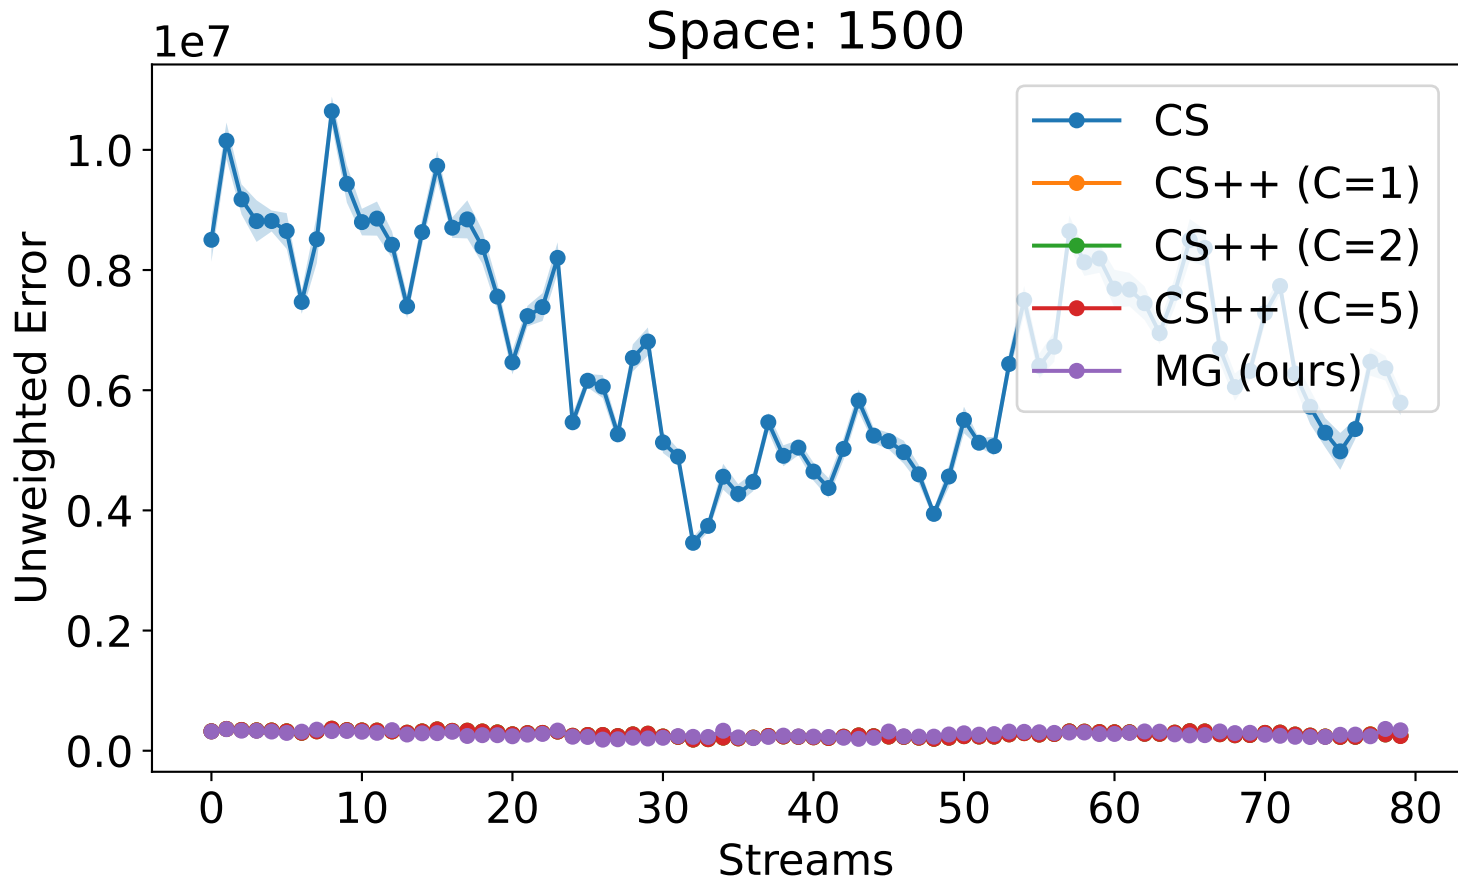

Supplement: supplementary_material [file attachment]

# Error/Space Tradeoff

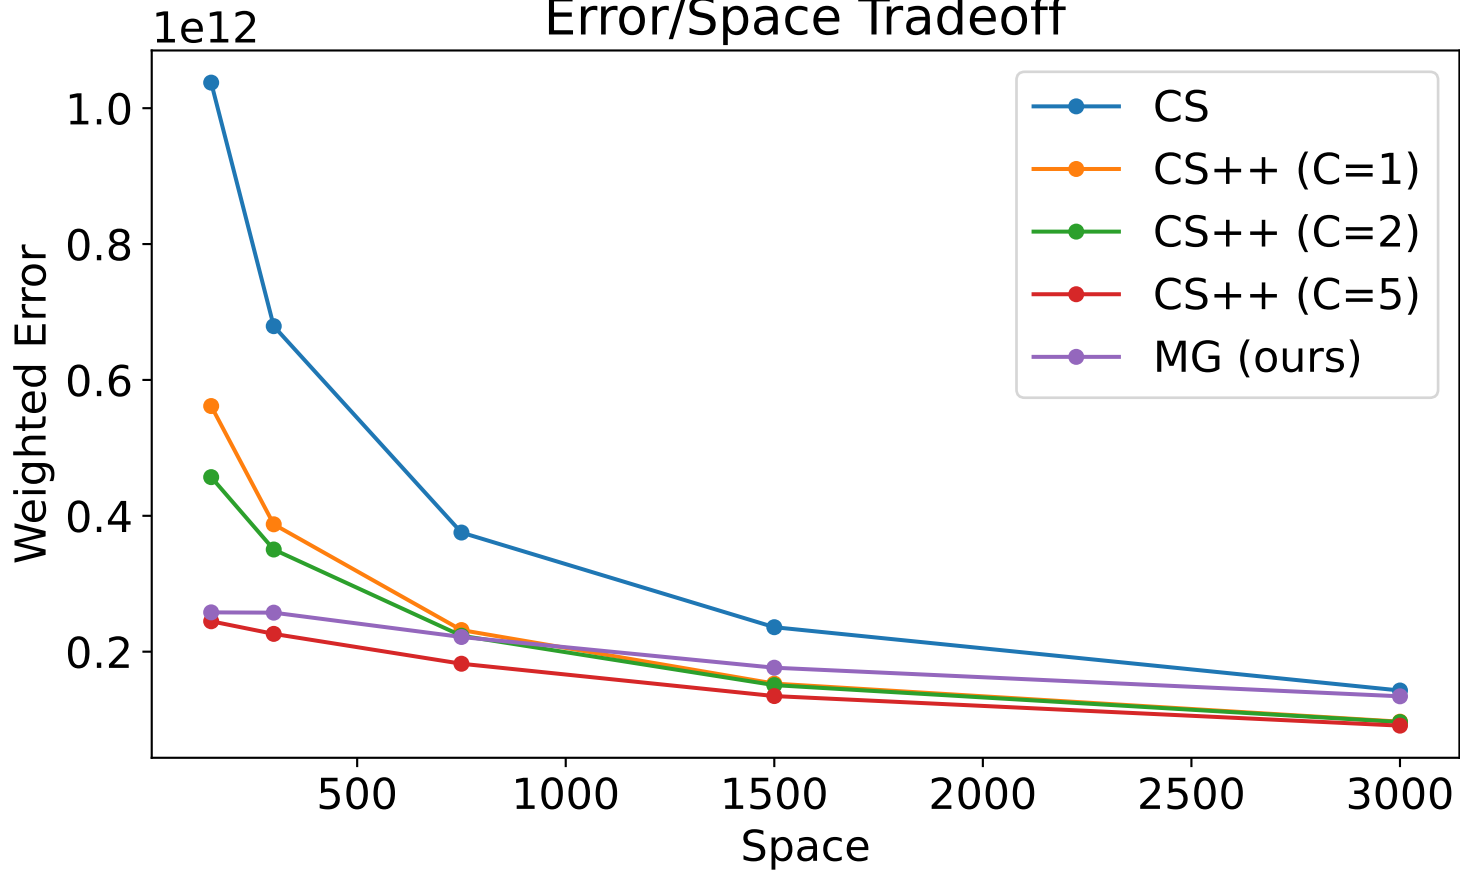

Supplement: supplementary_material [file attachment]

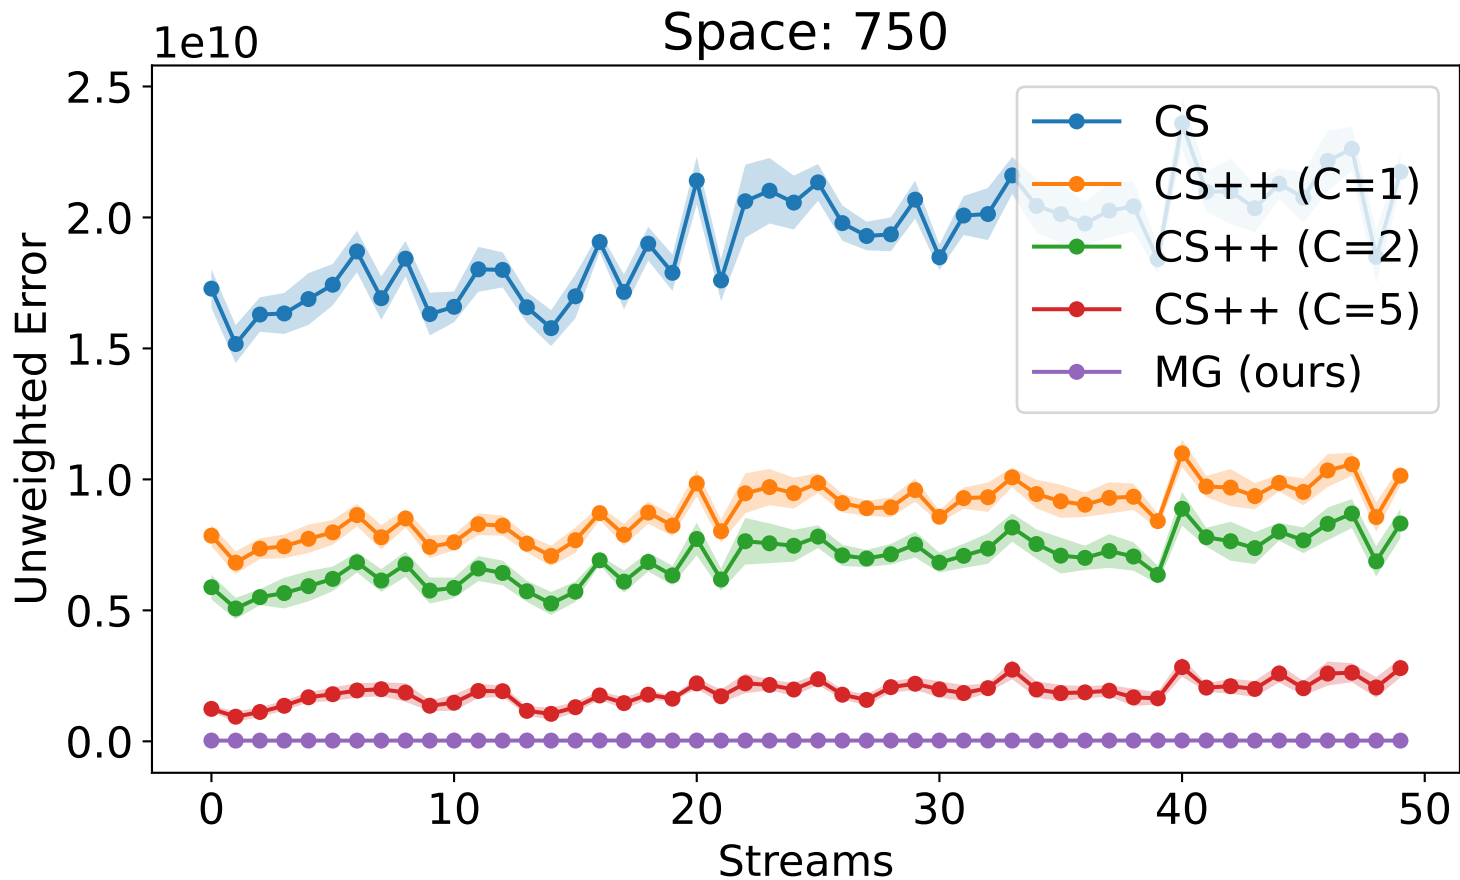

Supplement: supplementary_material [file attachment]

Rank: 20

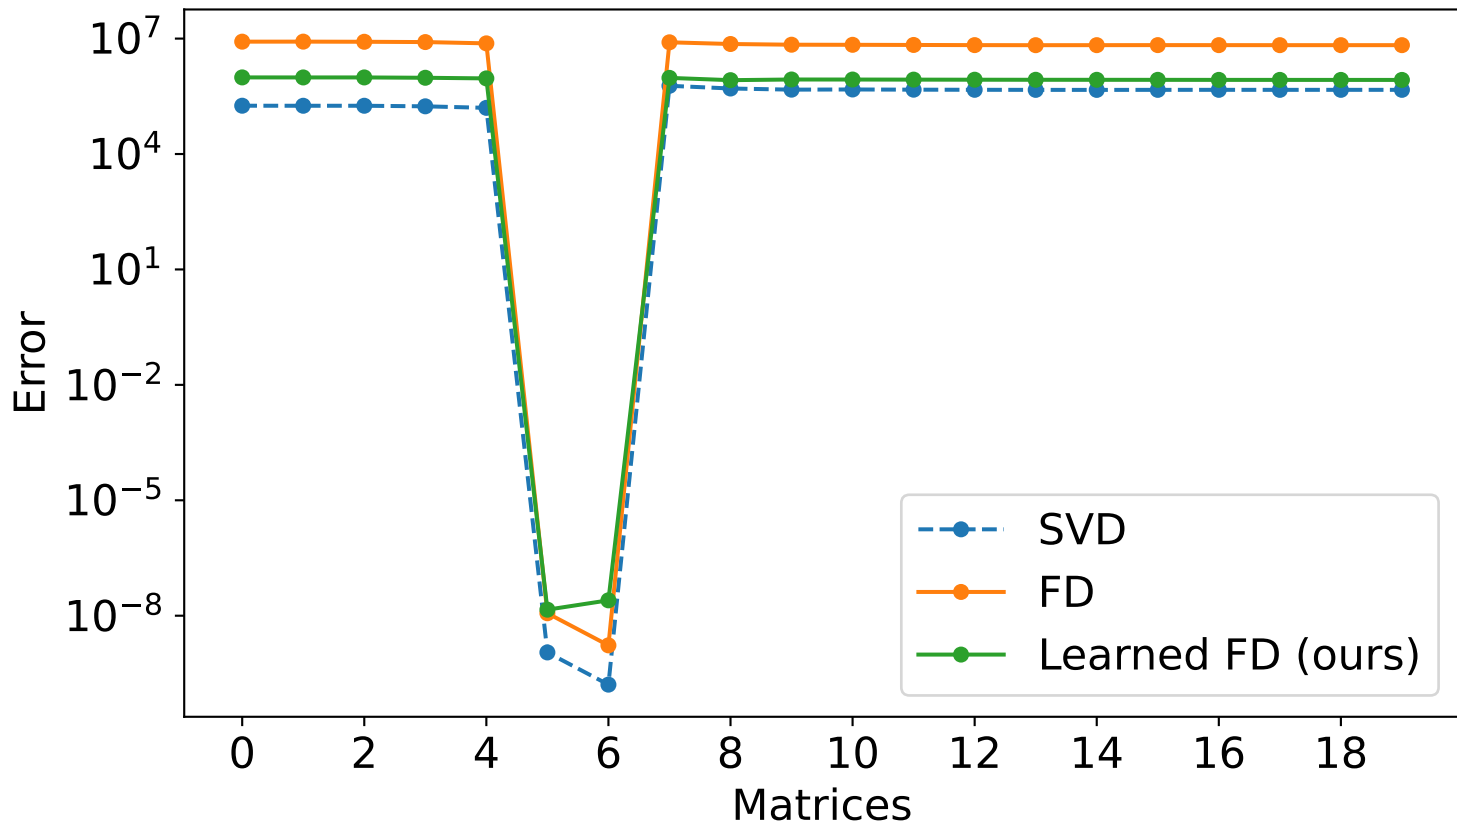

Supplement: supplementary_material [file attachment]

# Error/Space Tradeoff

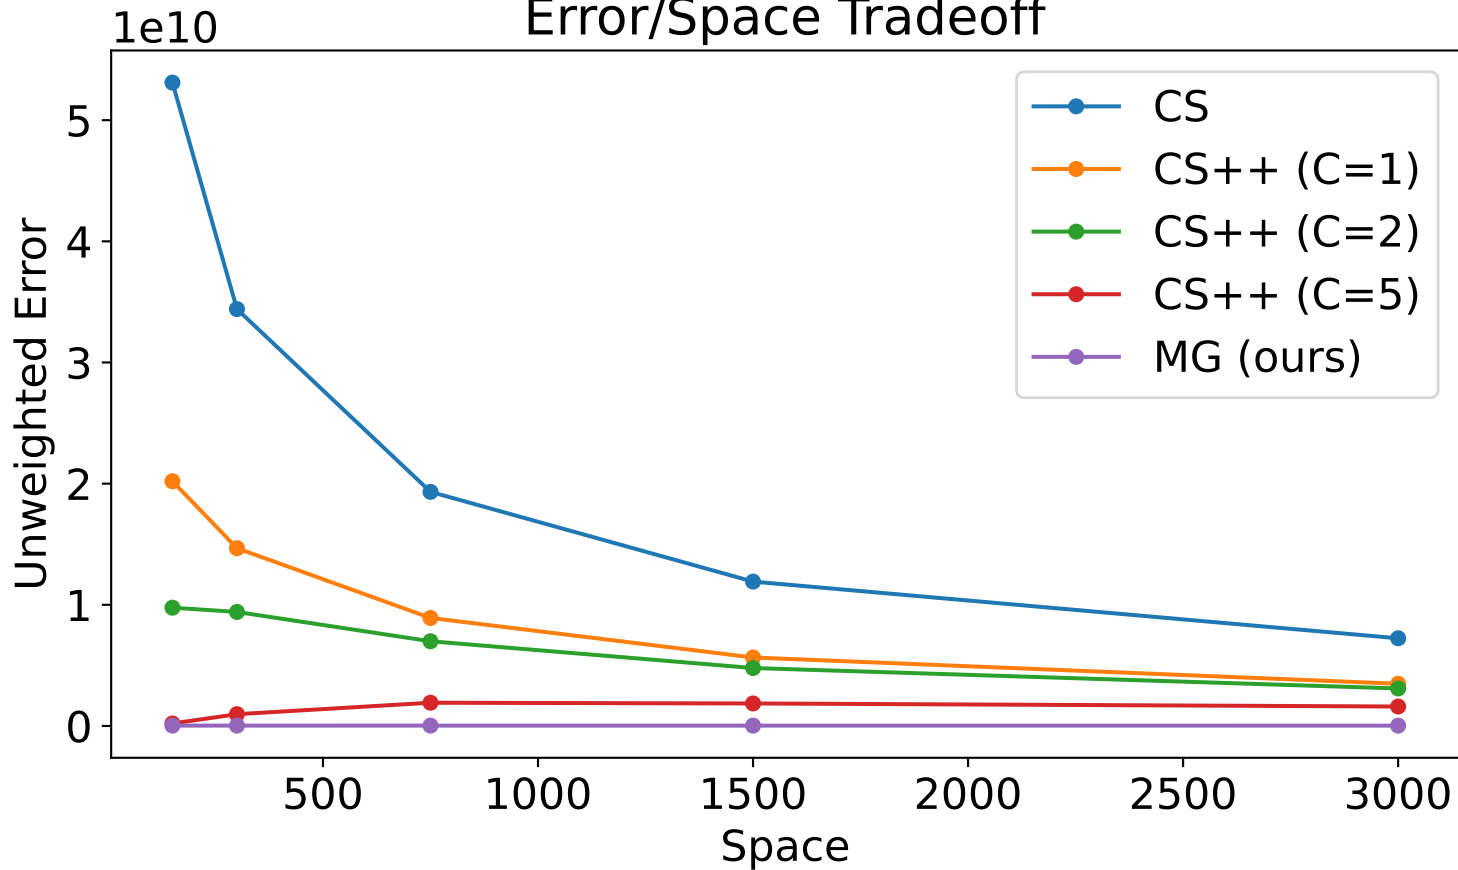

Supplement: supplementary_material [file attachment]

Rank: 100

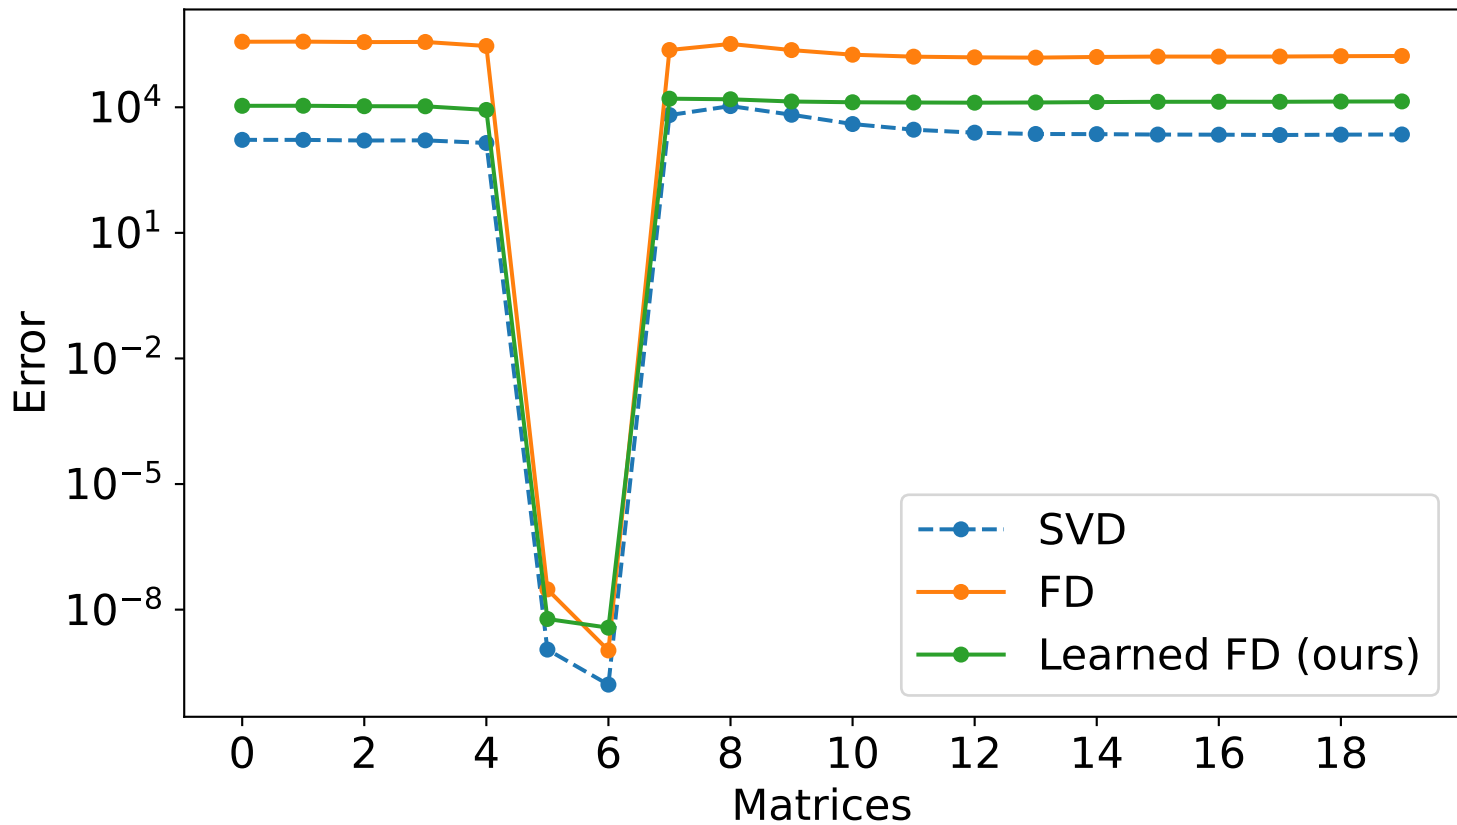

Supplement: supplementary_material [file attachment]

Space: 300

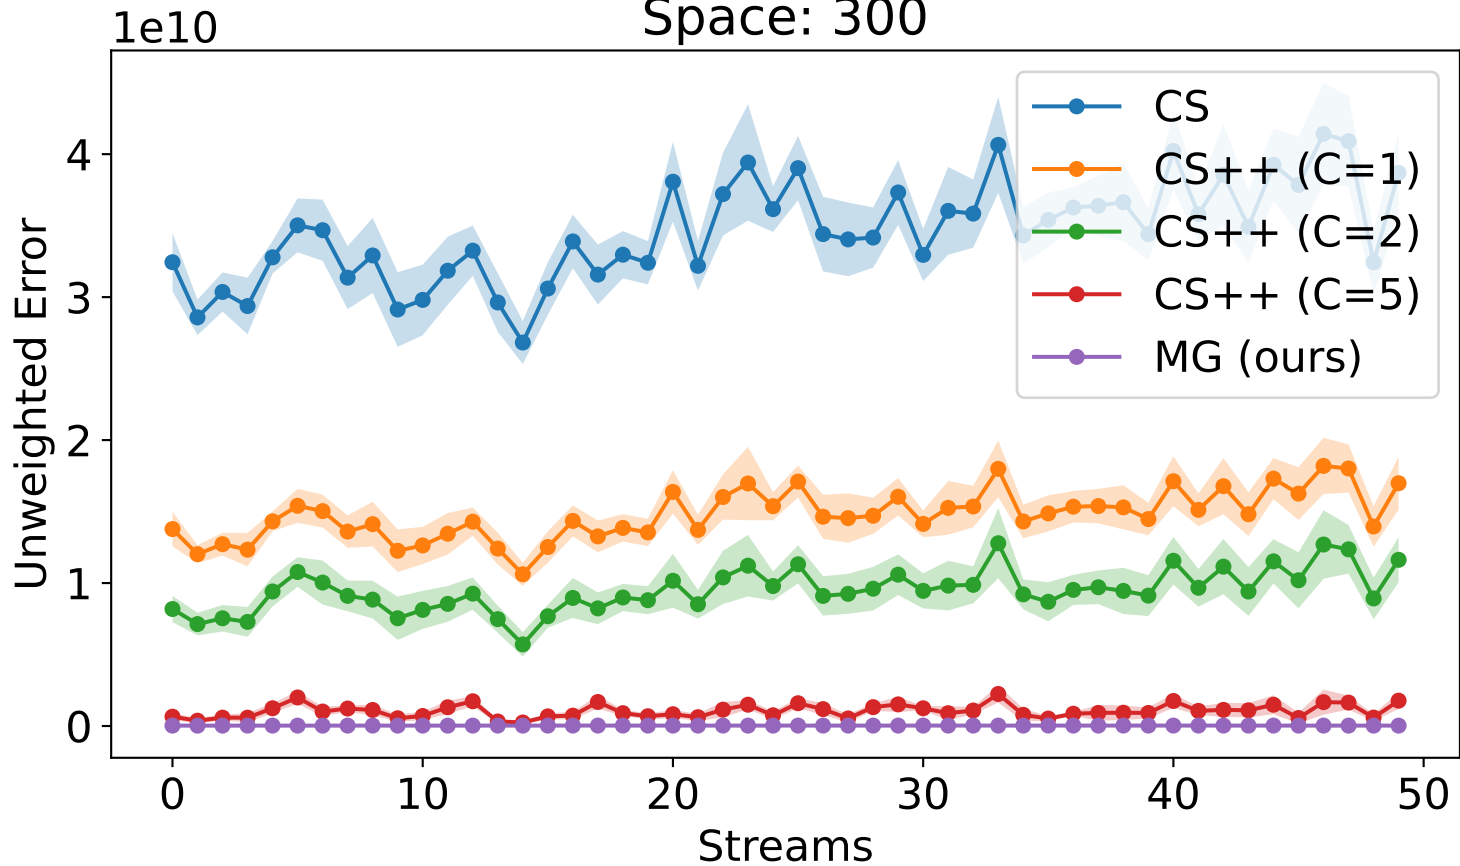

Supplement: supplementary_material [file attachment]

Rank: 60

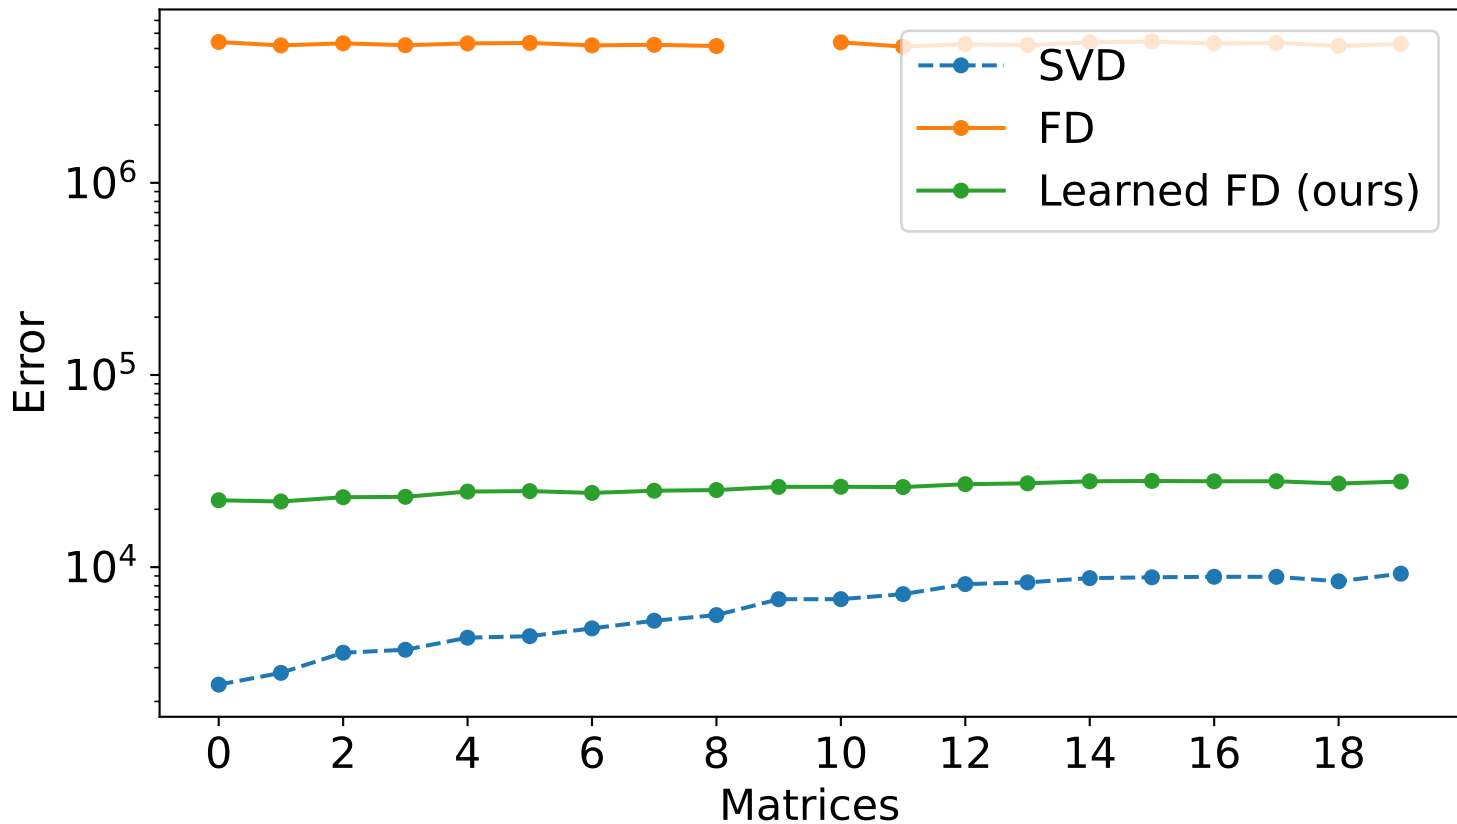

Supplement: supplementary_material [file attachment]

Rank: 120

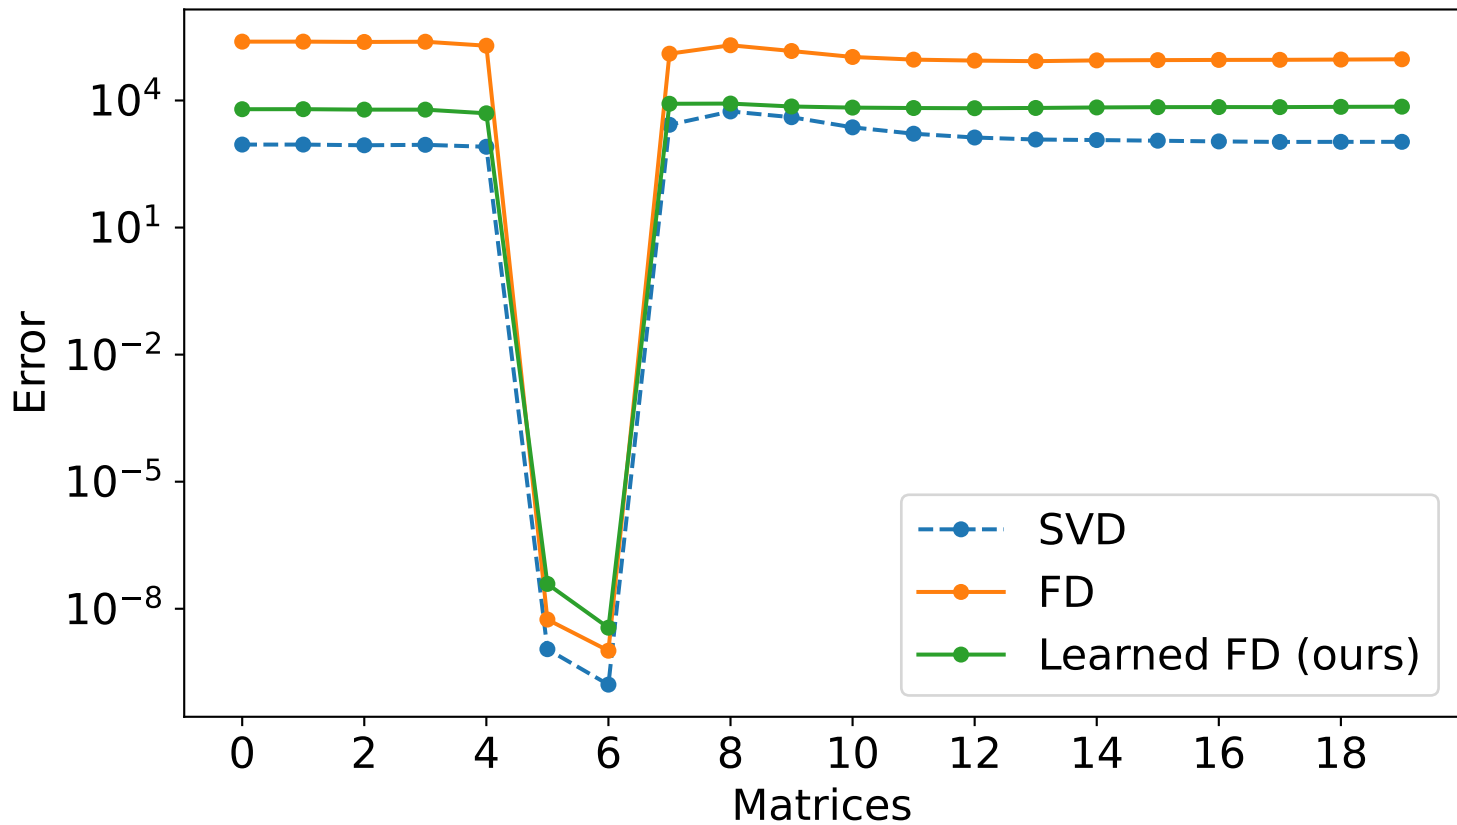

Supplement: supplementary_material [file attachment]

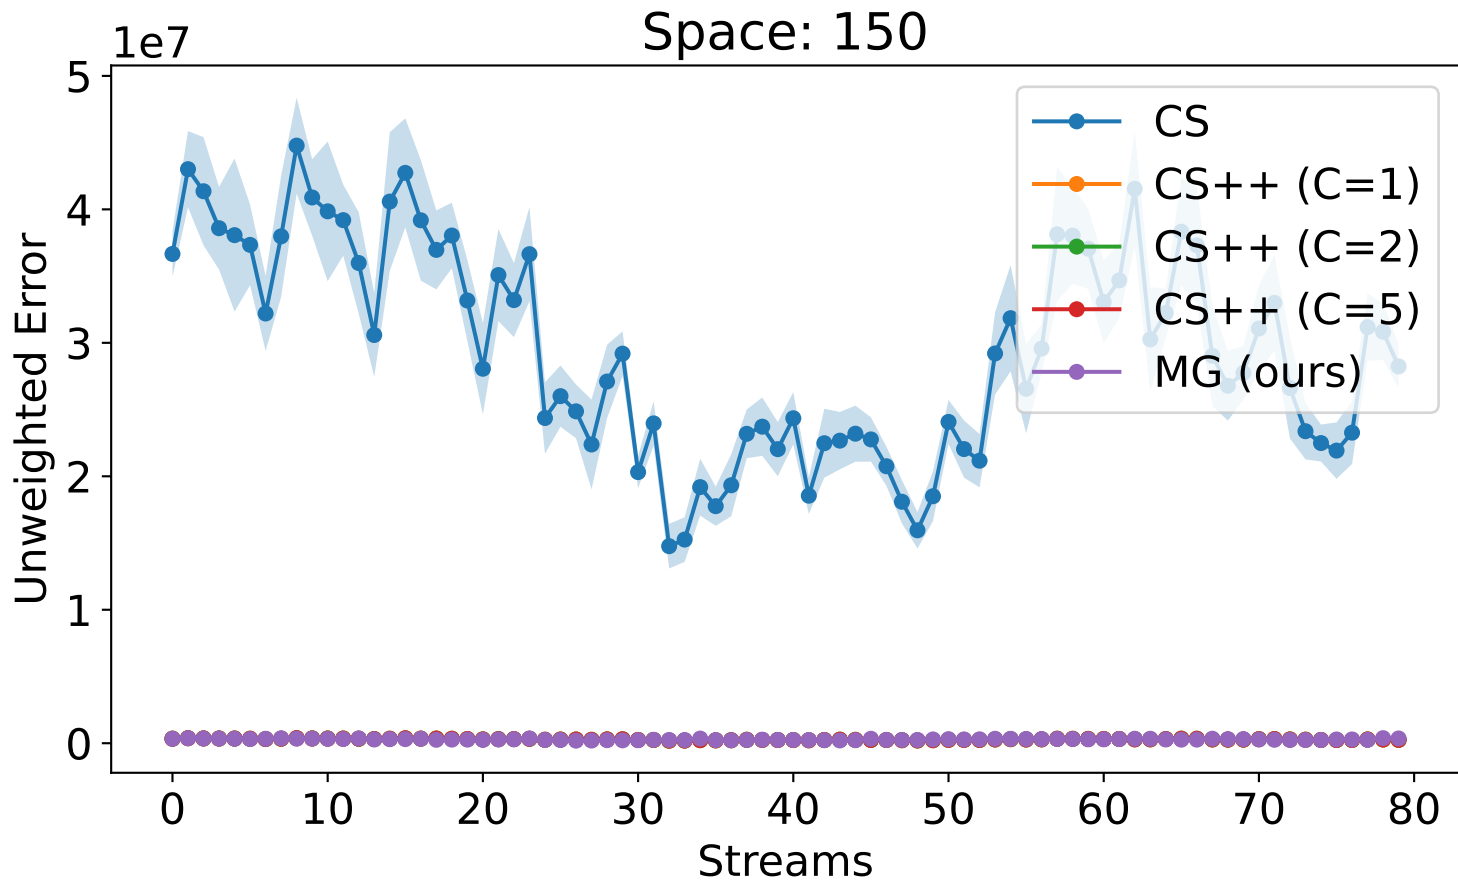

Supplement: supplementary_material [file attachment]

Space: 300

1e7

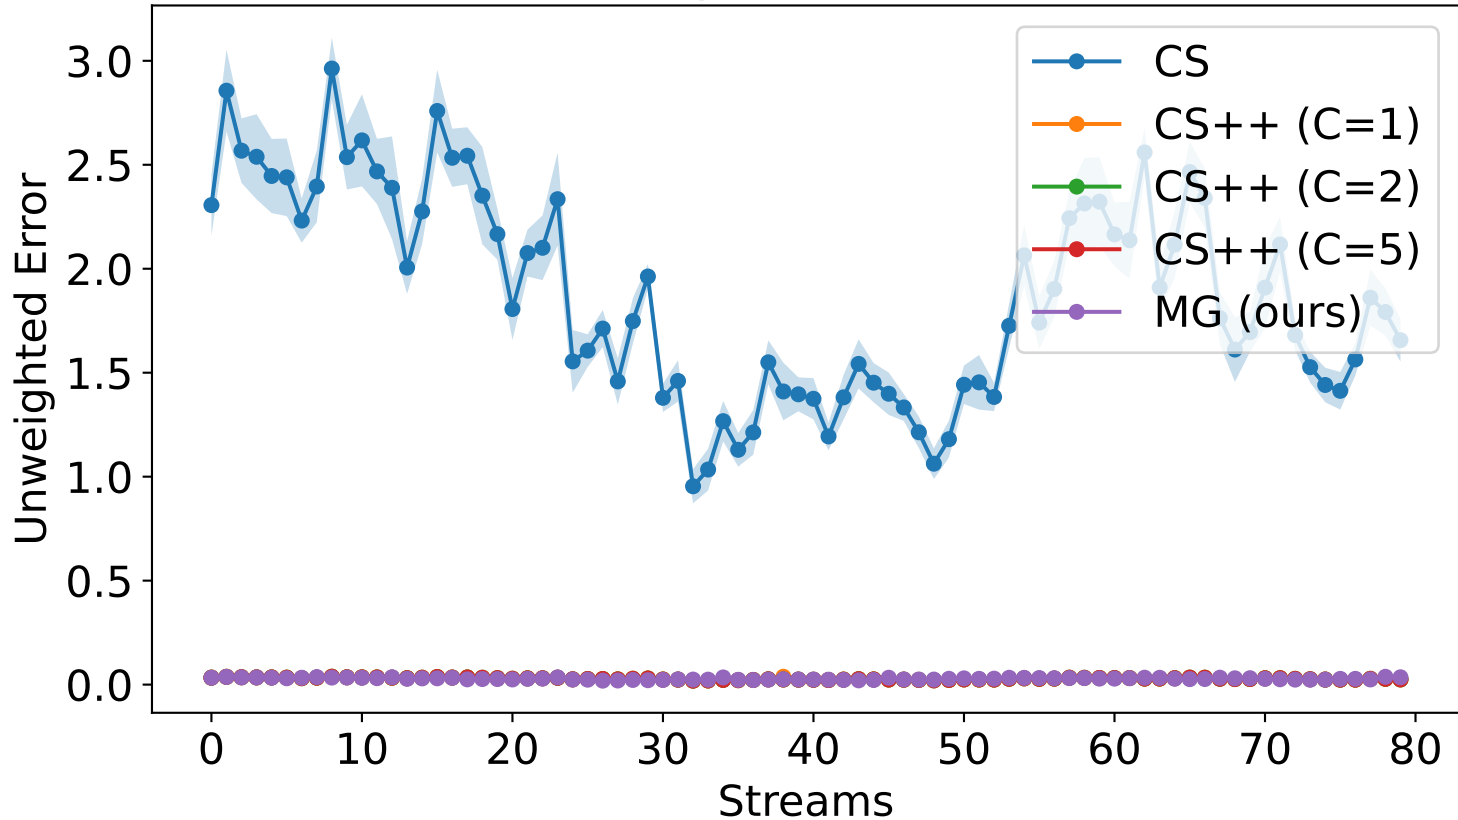

Supplement: supplementary_material [file attachment]

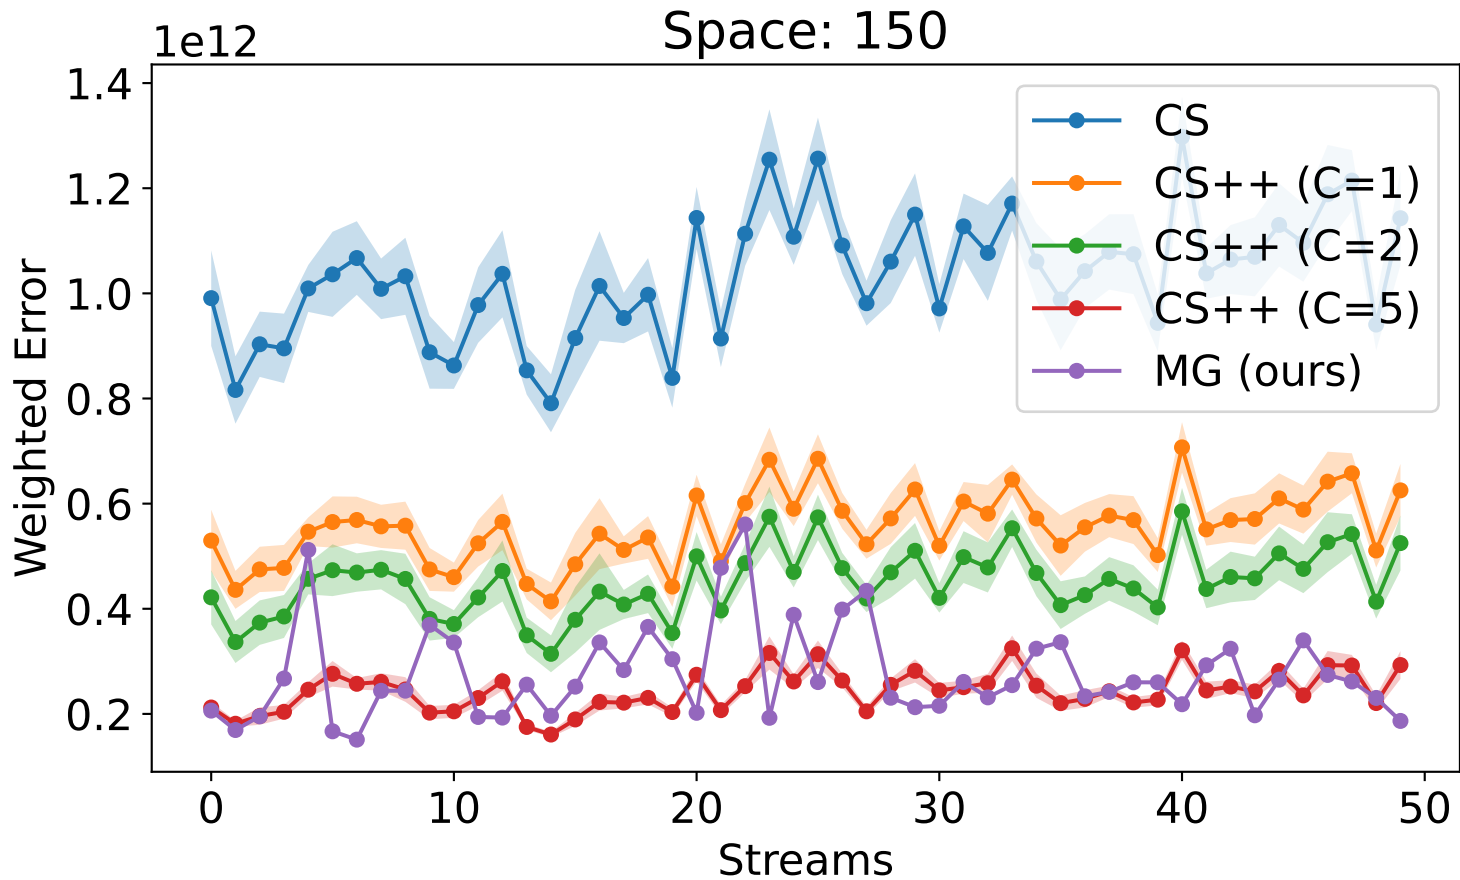

Supplement: supplementary_material [file attachment]

# Error/Space Tradeoff

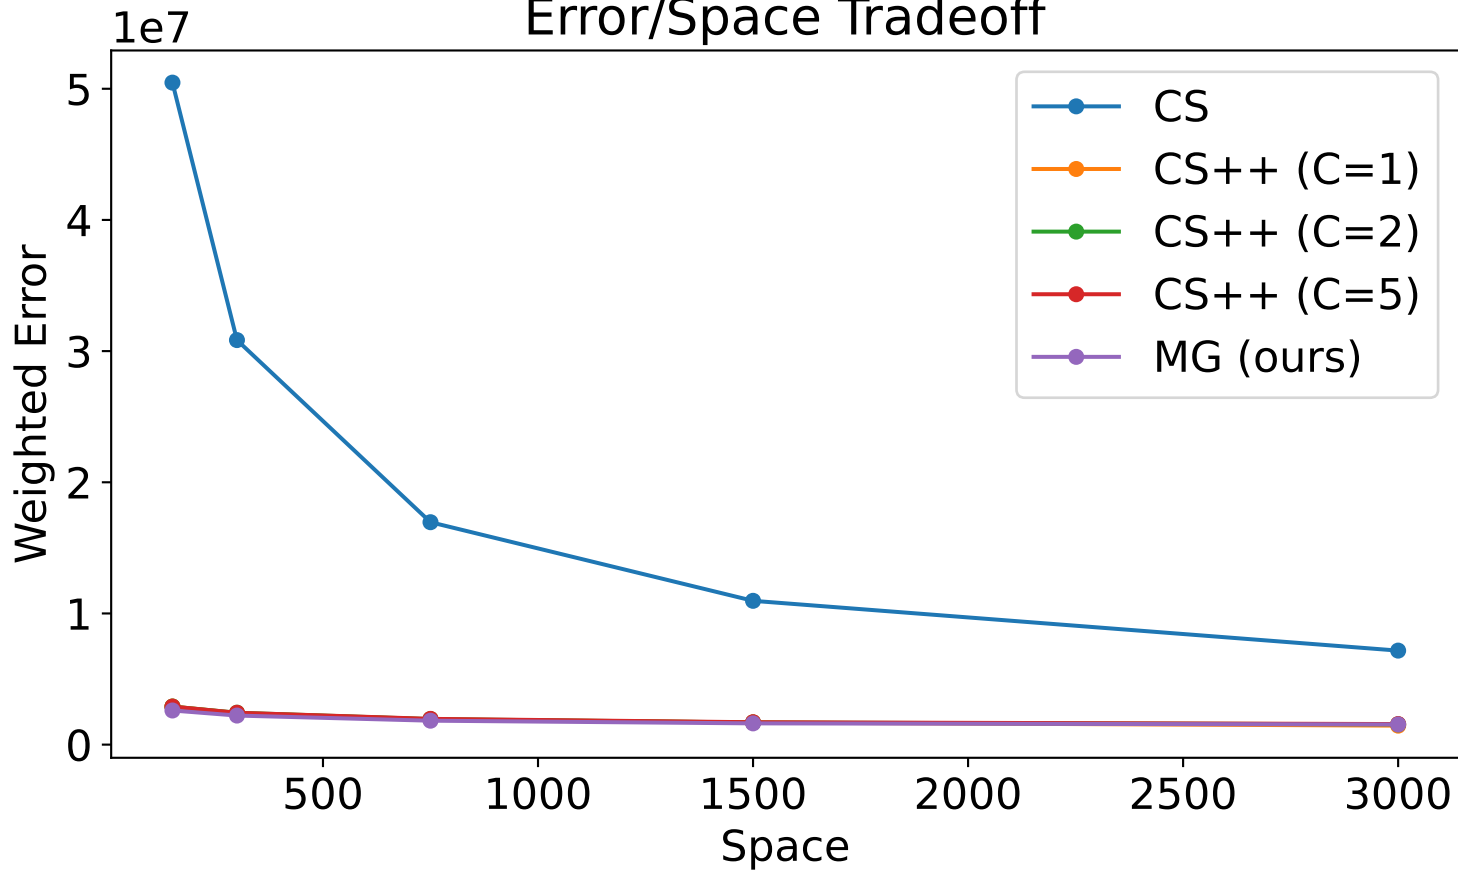

Supplement: supplementary_material [file attachment]

Rank: 80

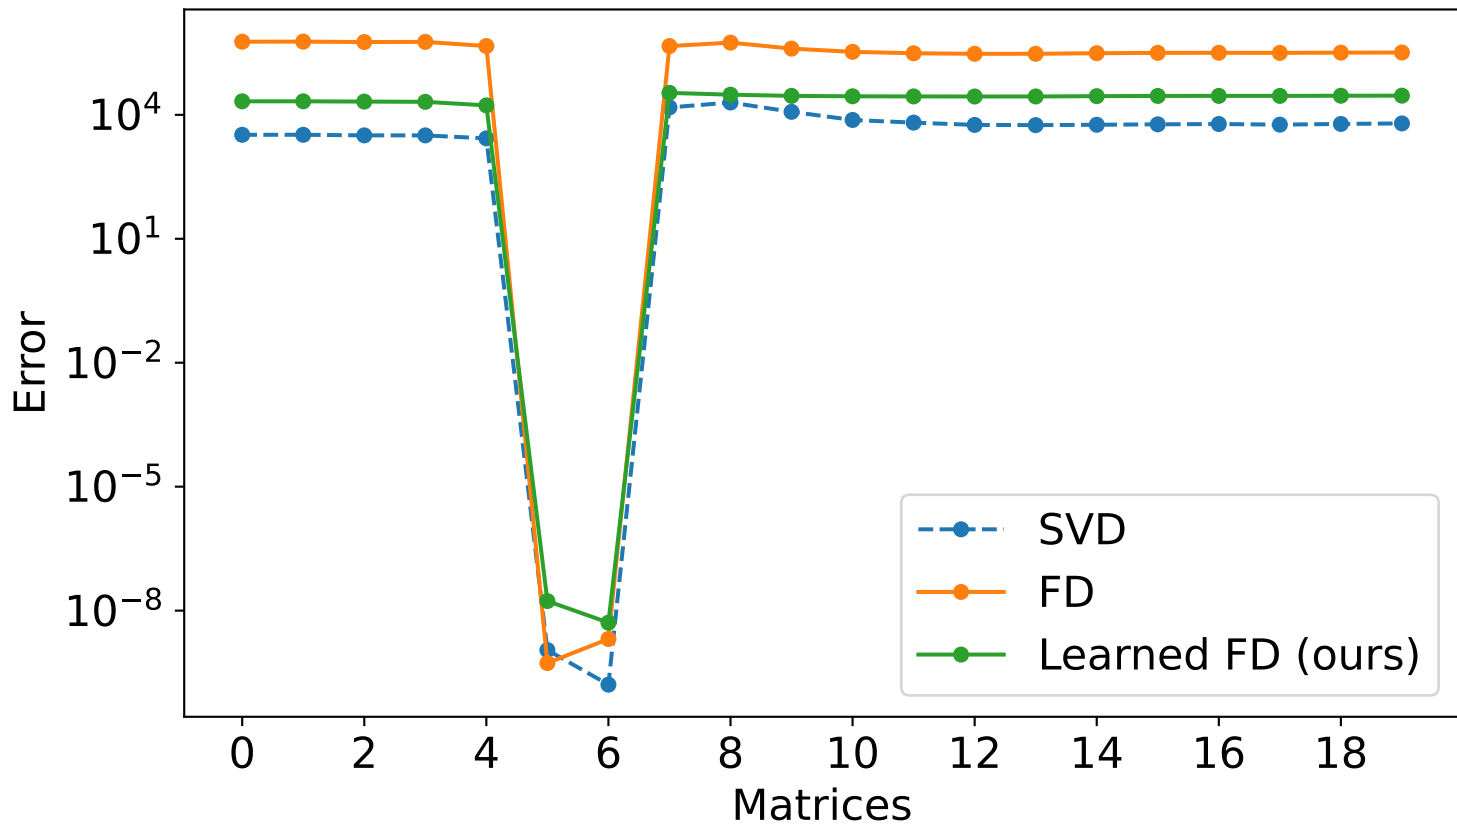

Supplement: supplementary_material [file attachment]

# Error/Rank Tradeoff

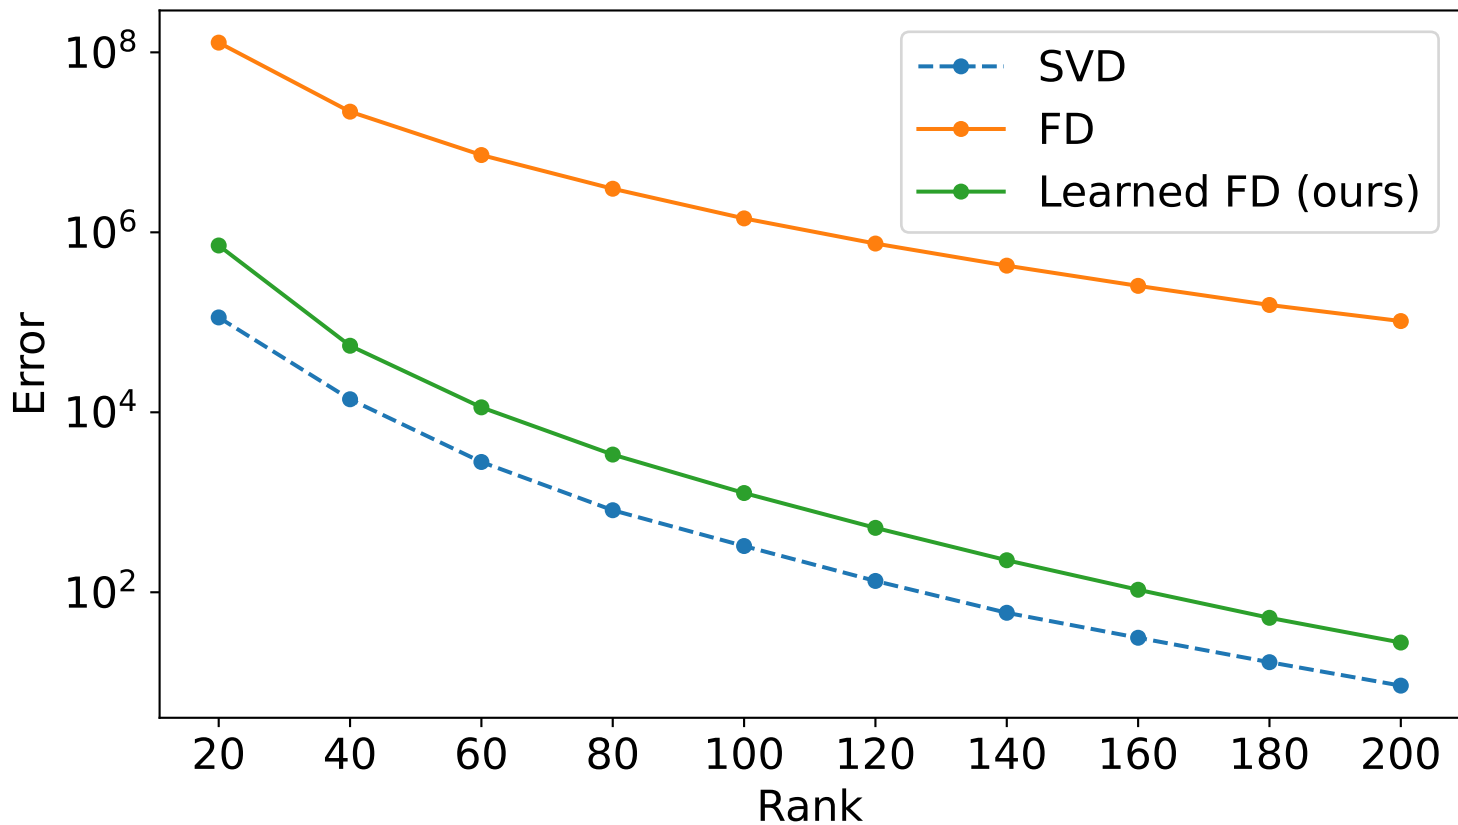

Supplement: supplementary_material [file attachment]

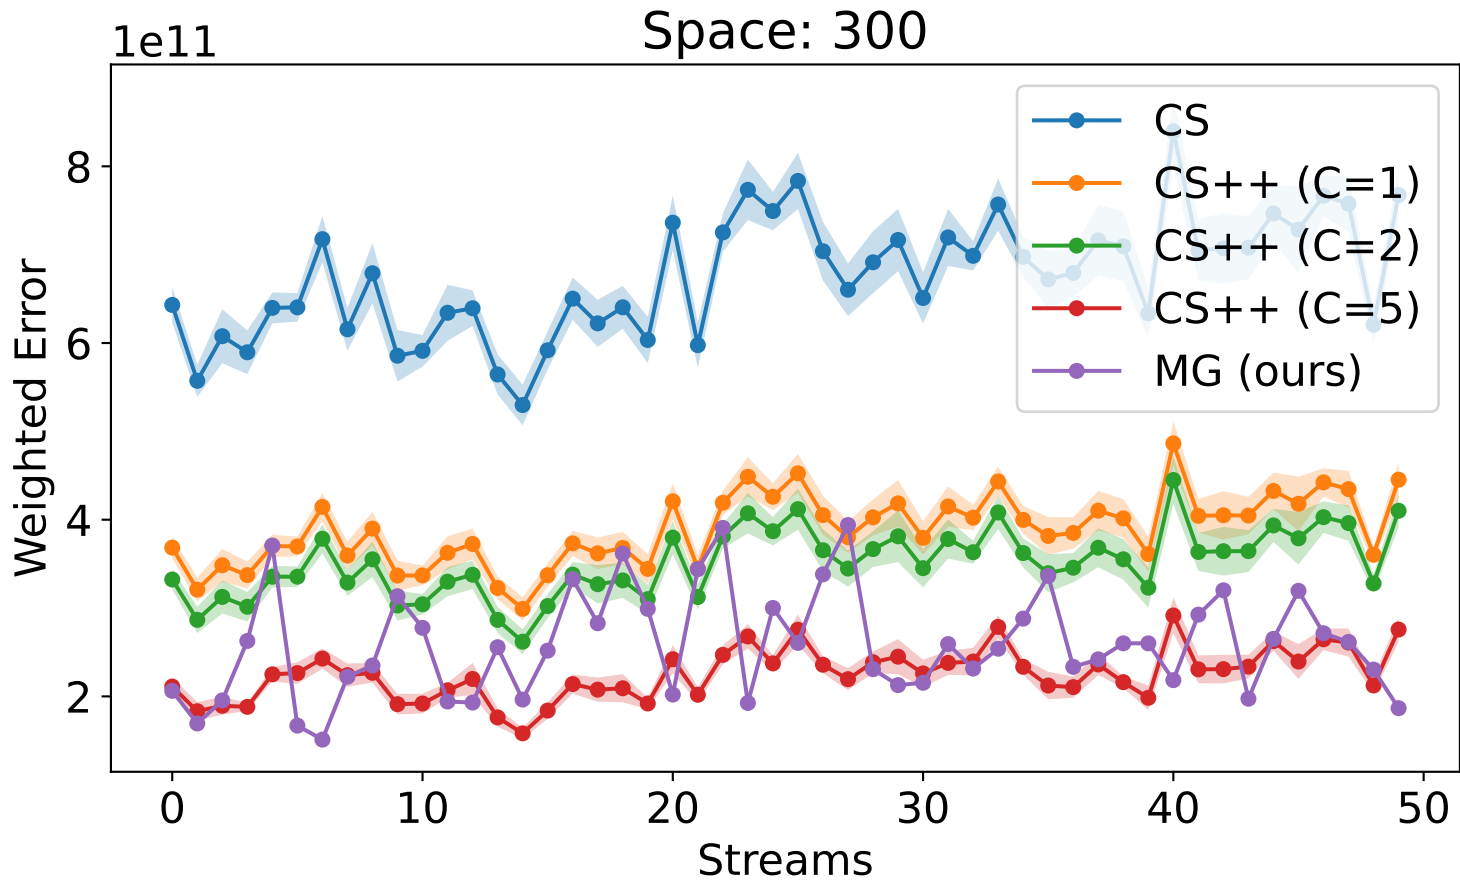

Supplement: supplementary_material [file attachment]

# Error/Space Tradeoff

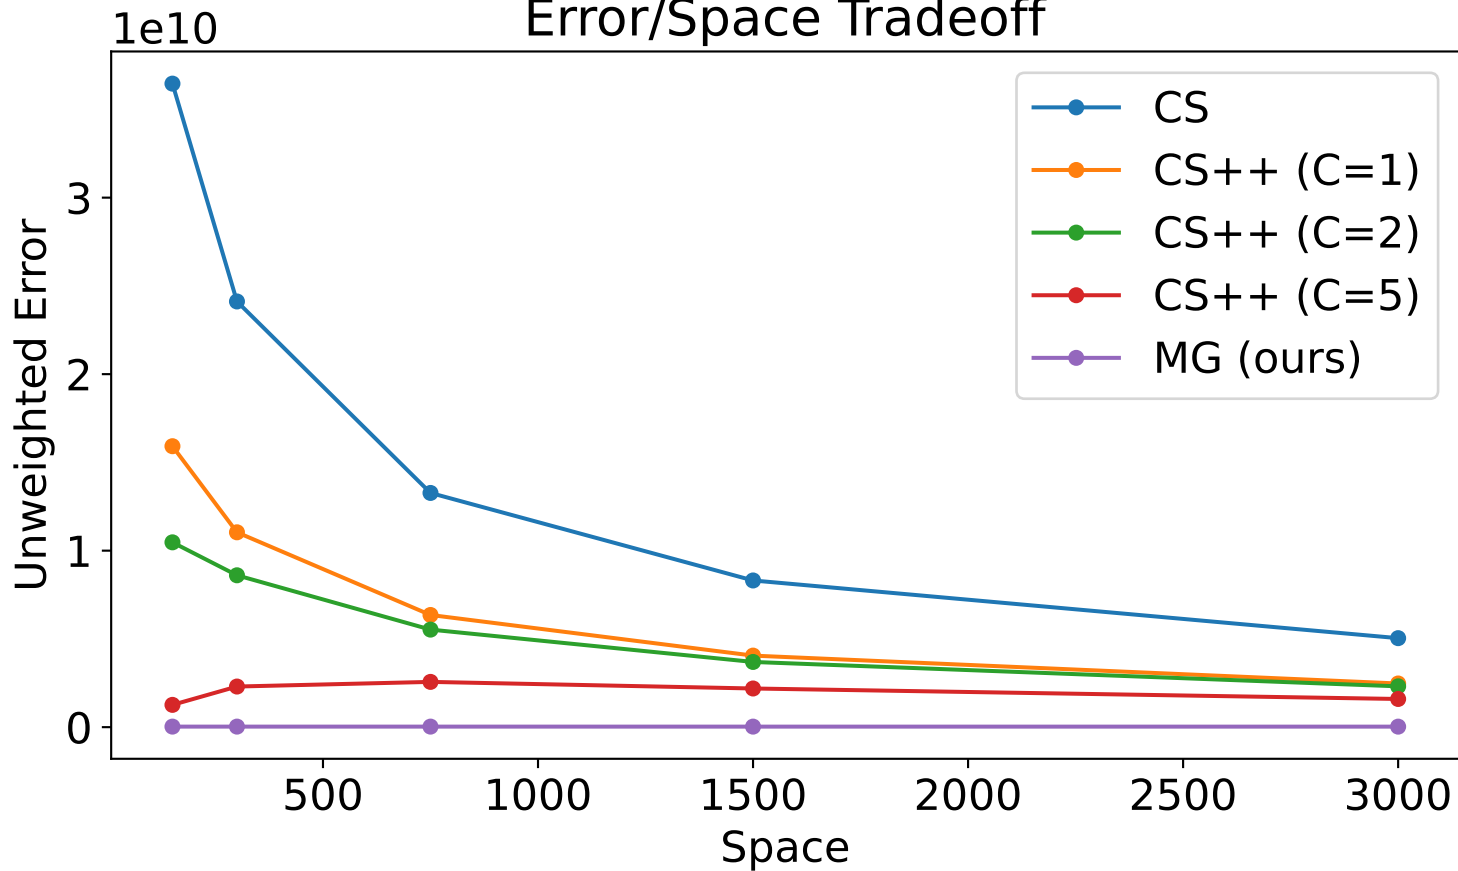

Supplement: supplementary_material [file attachment]

Rank: 80

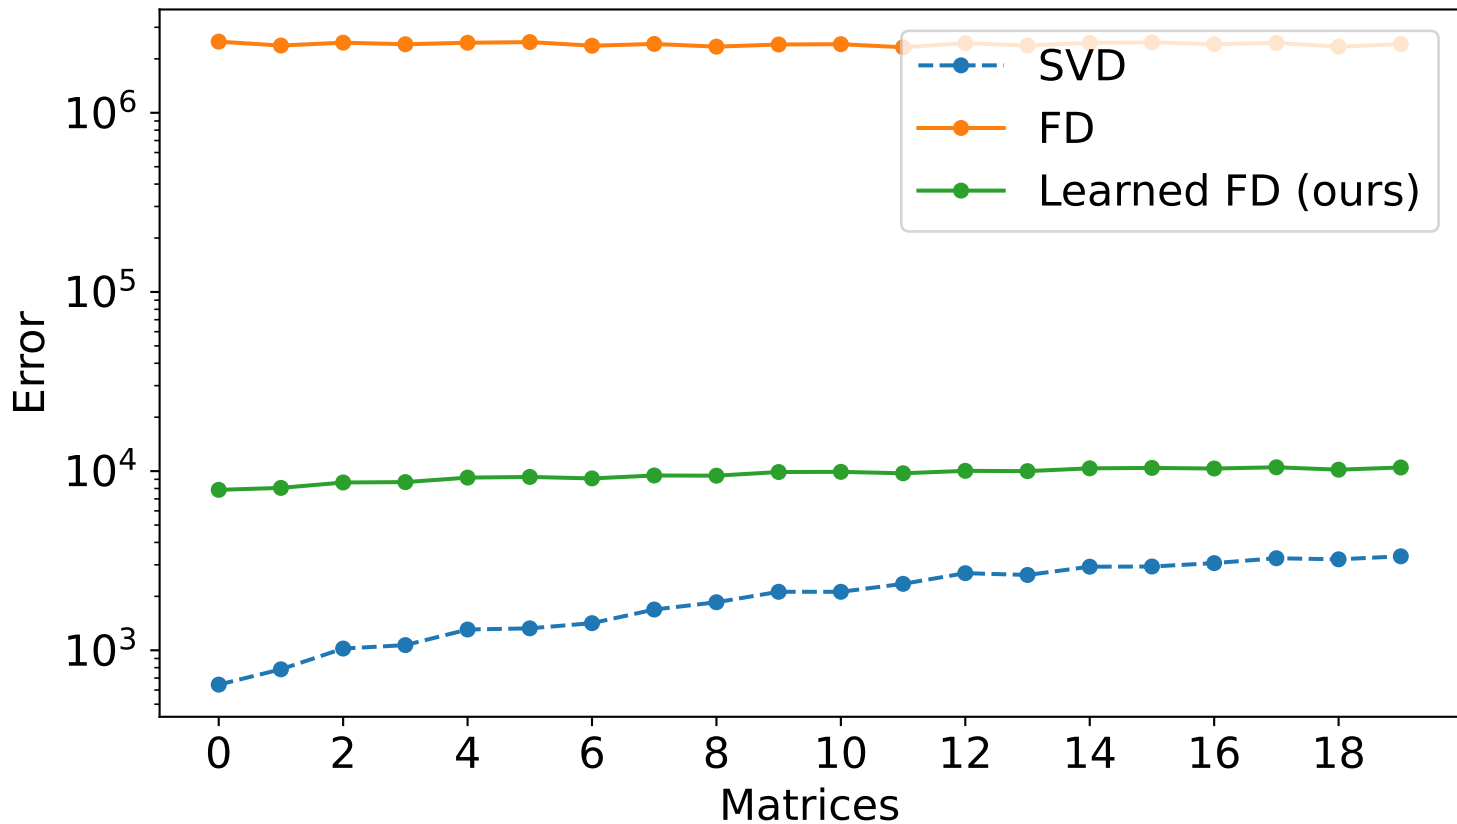

Supplement: supplementary_material [file attachment]

# CAIDA Log-Log Frequencies

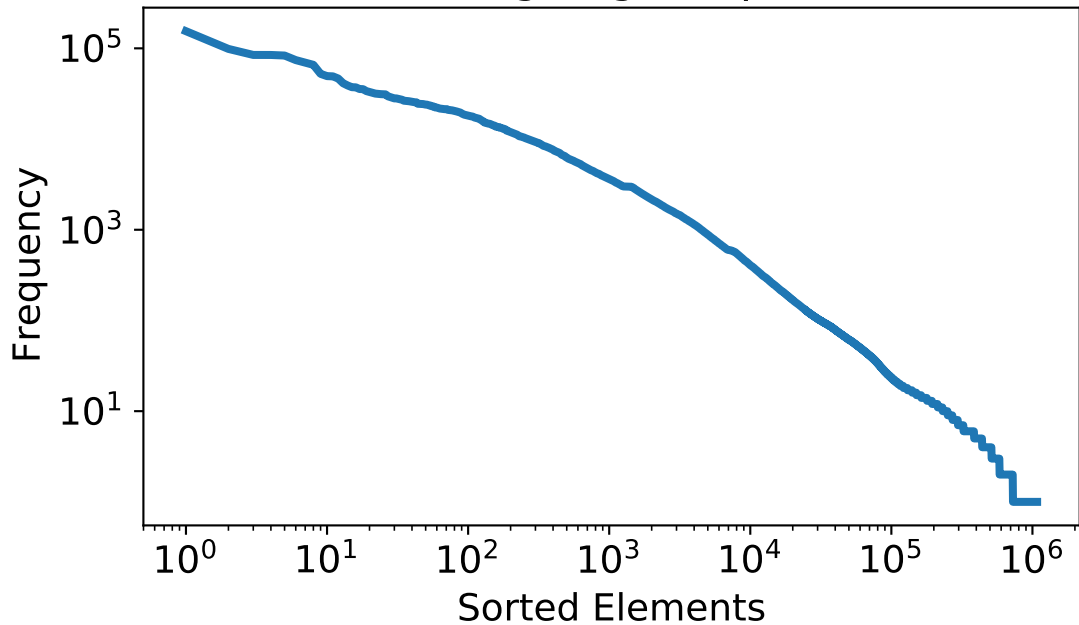

Supplement: supplementary_material [file attachment]

Rank: 180

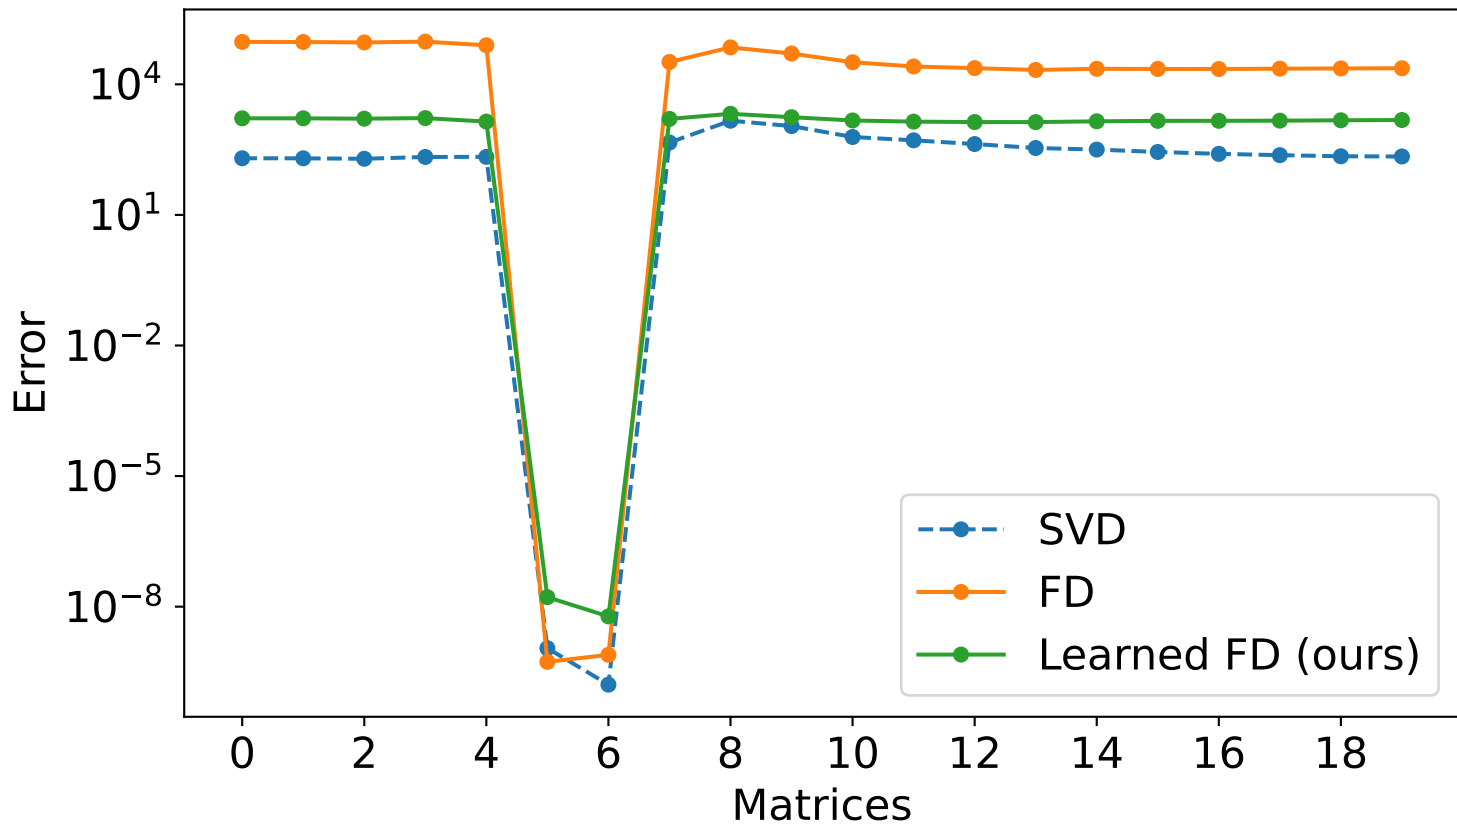

Supplement: supplementary_material [file attachment]

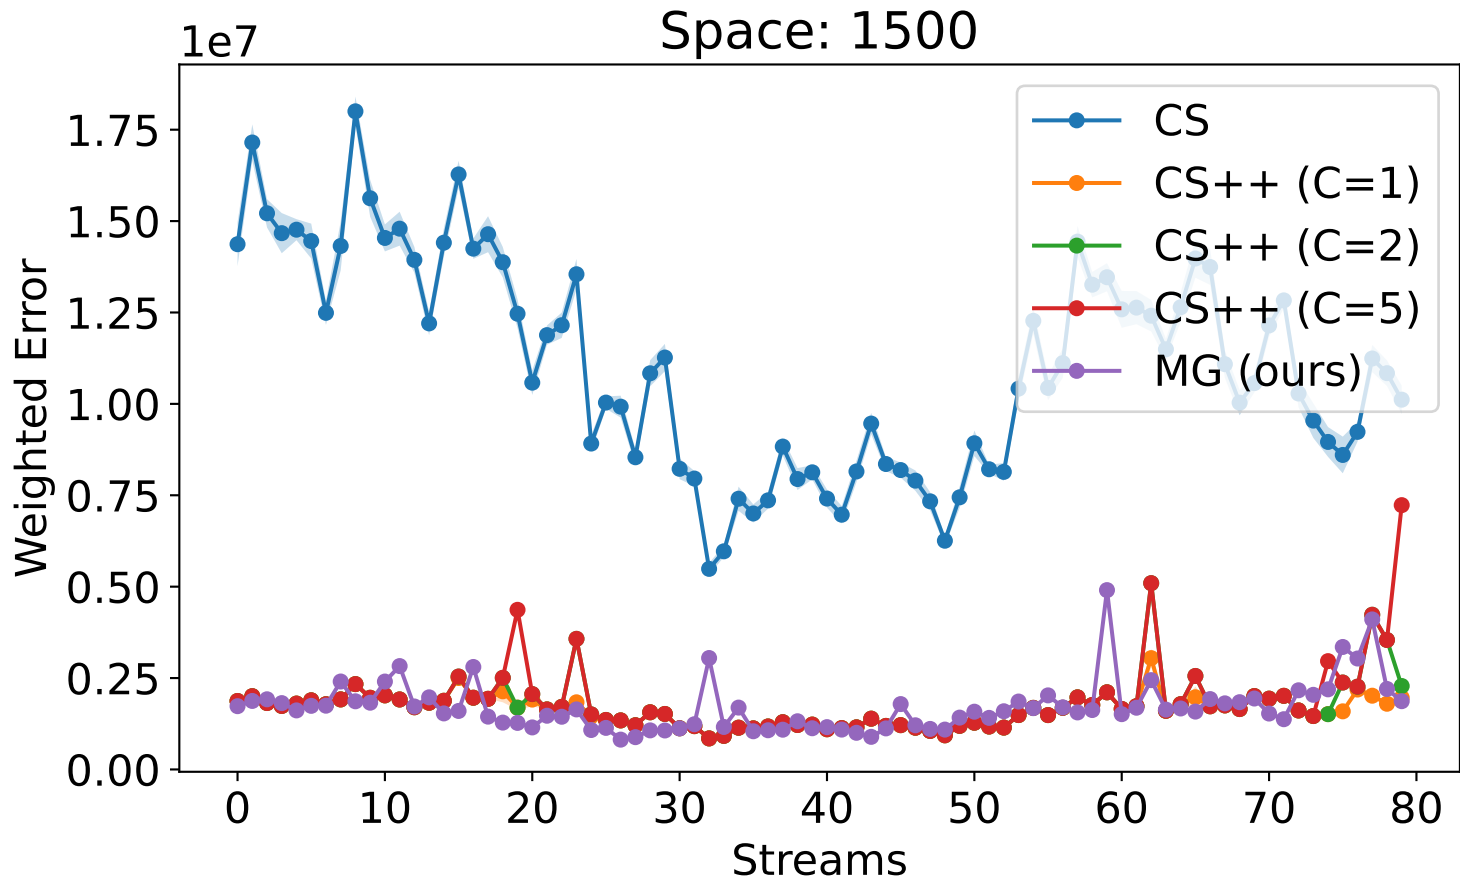

Supplement: supplementary_material [file attachment]

Rank: 80

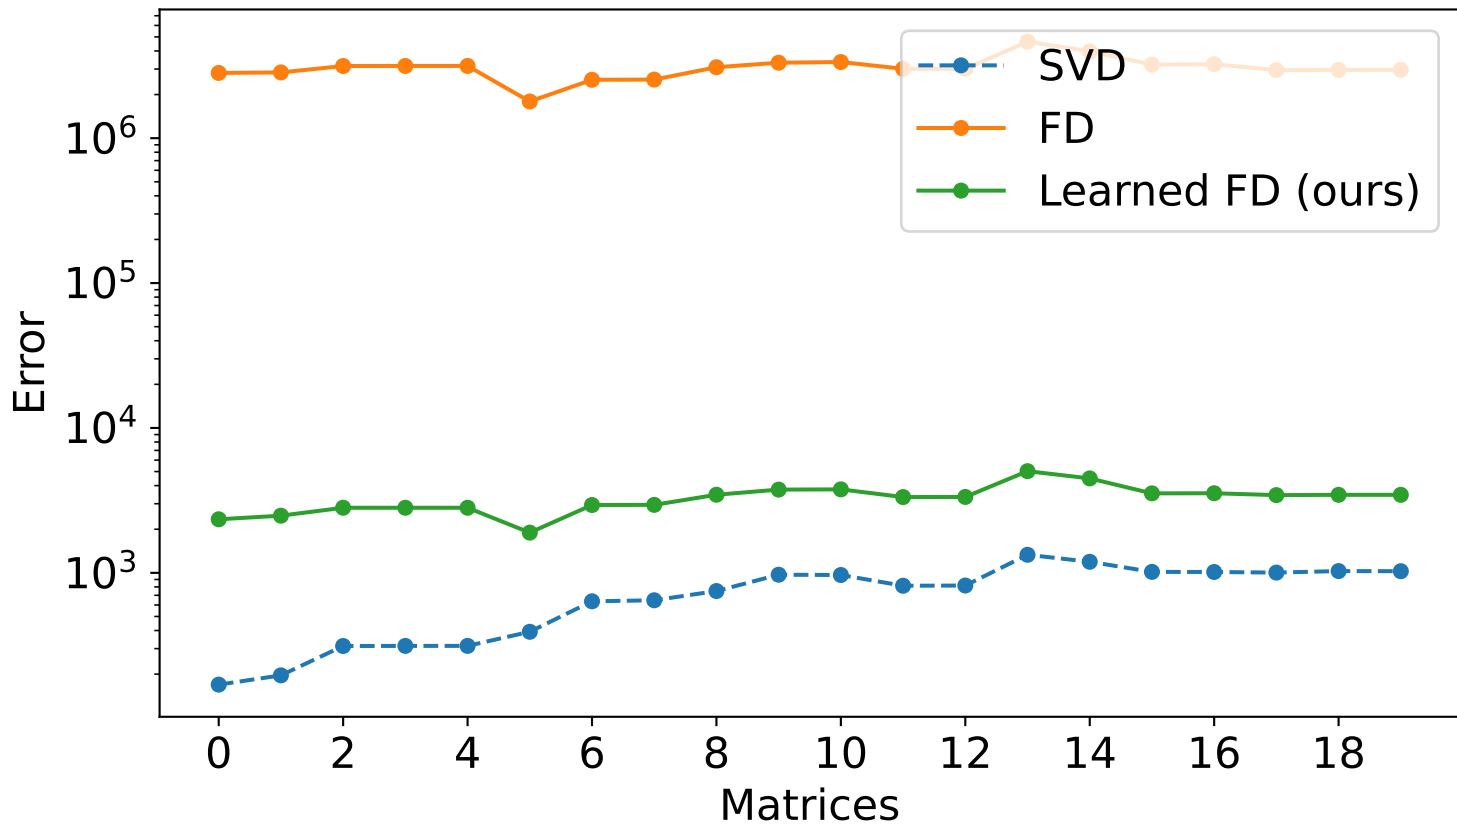

Supplement: supplementary_material [file attachment]

Space: 150

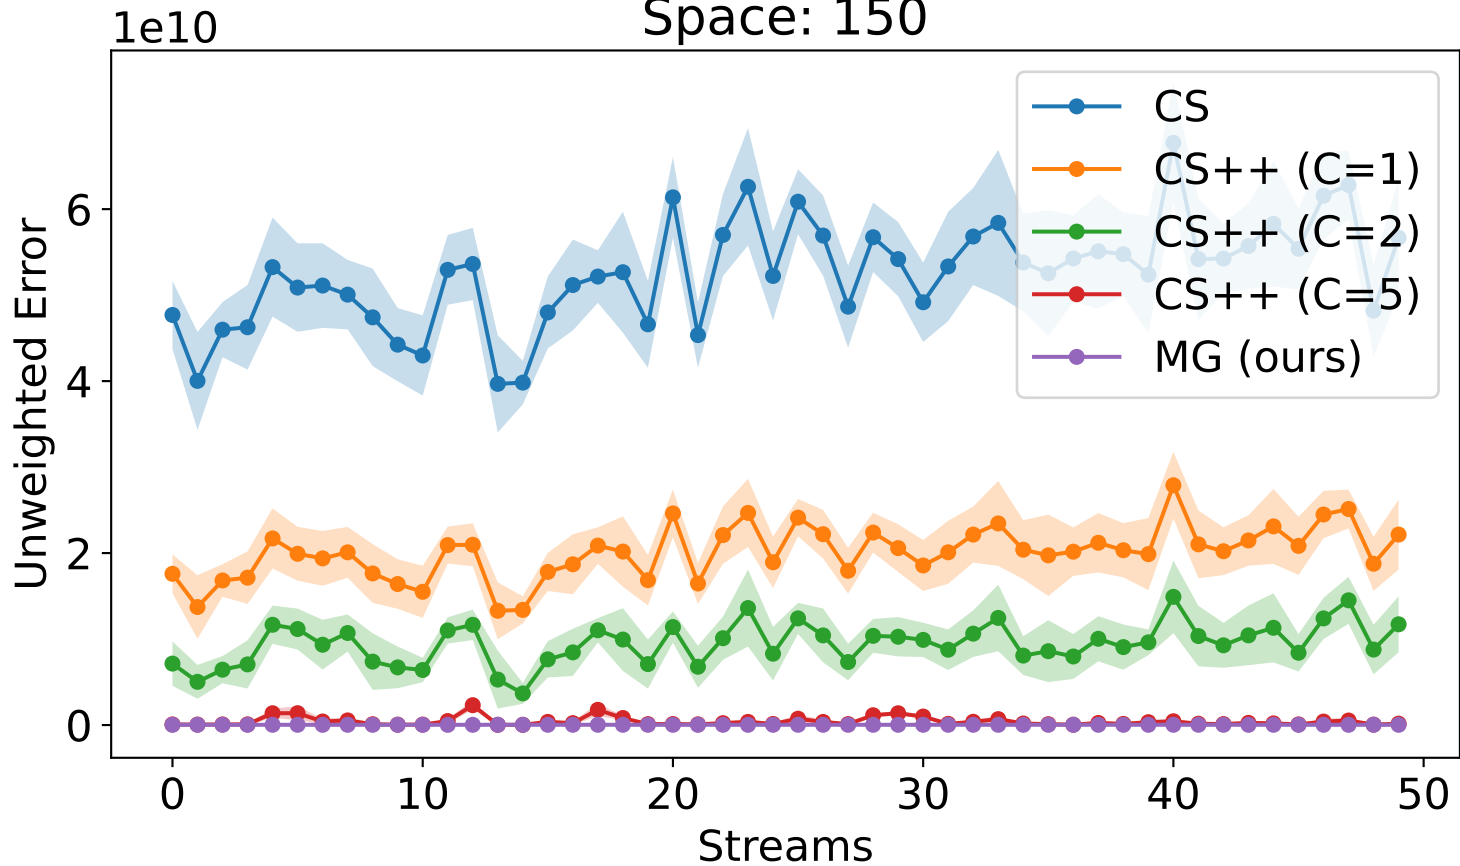

Supplement: supplementary_material [file attachment]

# Hyper Log-Log Singular Values

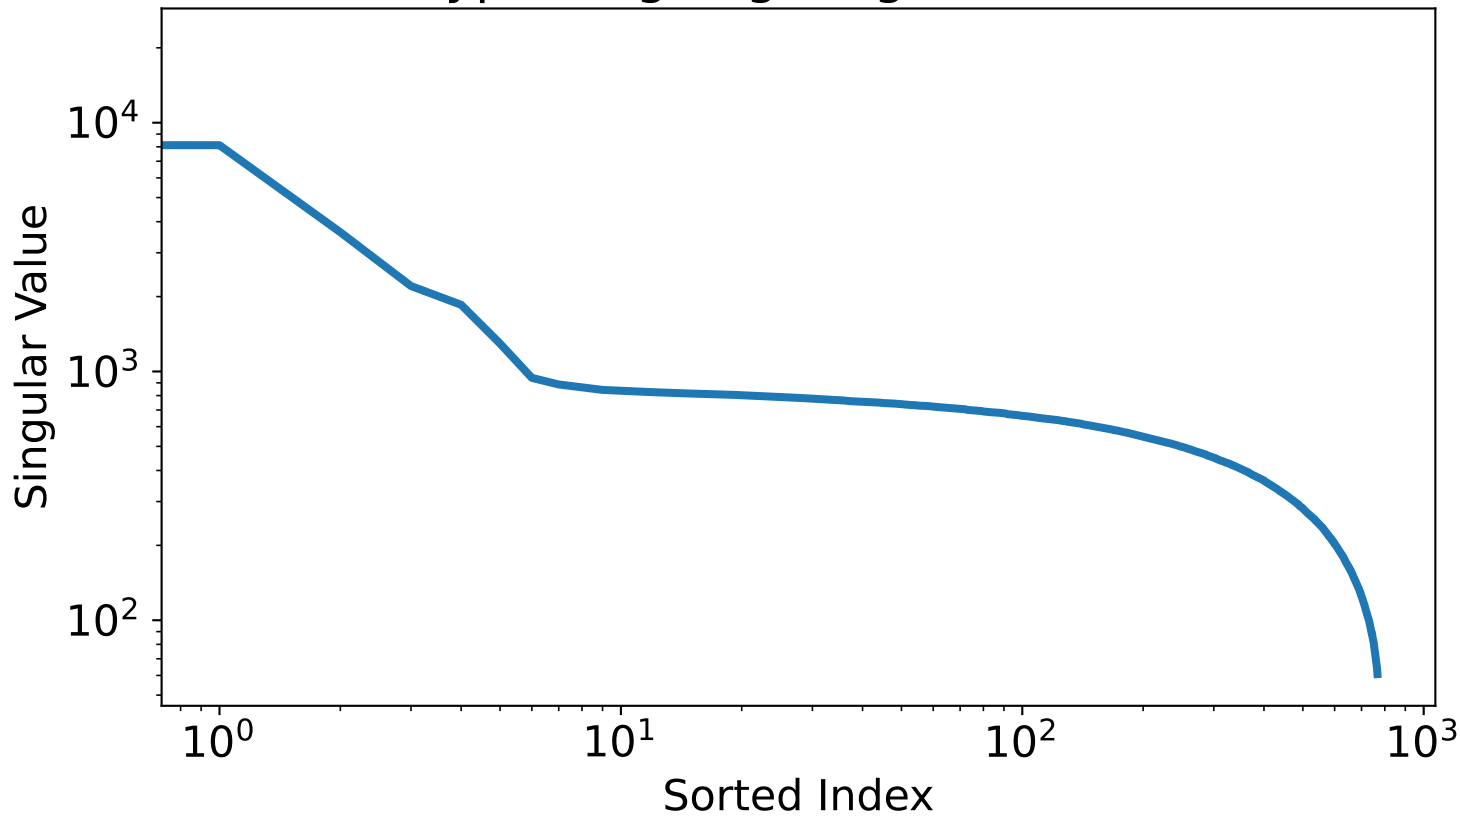

Supplement: supplementary_material [file attachment]

Space: 300

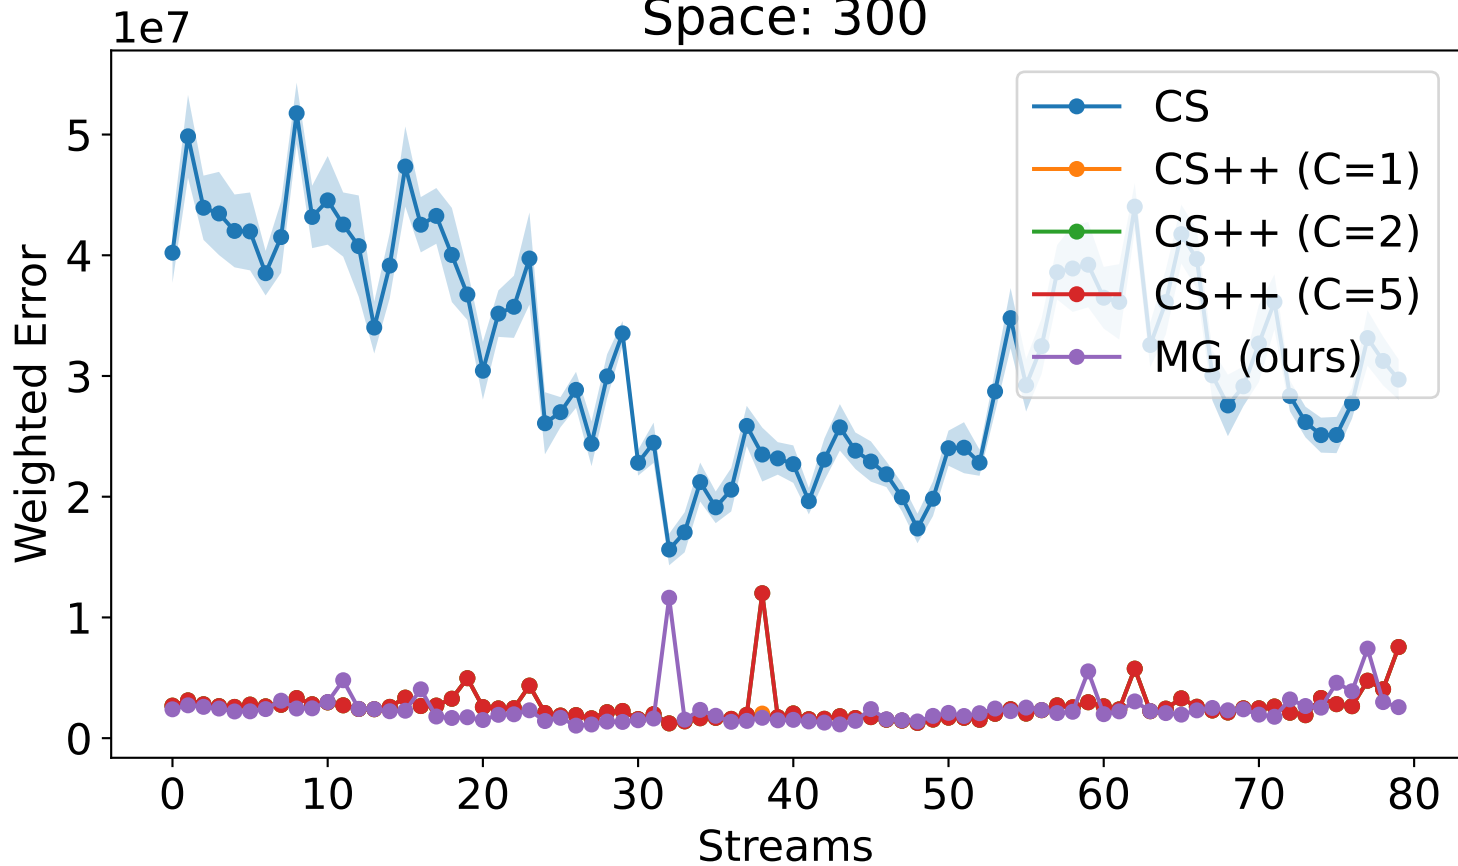

Supplement: supplementary_material [file attachment]
